# Supplementary material for: A Differential Wiring Analysis of Expression Data Correctly Identifies the Gene Containing the Causal Mutation
Source: PLoS Comput Biol. 2009 May 1;5(5):e1000382. doi: 10.1371/journal.pcbi.1000382 (PMC2671163; doi:10.1371/journal.pcbi.1000382)
Supplement: Table S1 — The normalised mean expression for the 11,057 genes across the ten developmental time points for the two breed crosses. (4.30 MB XLS) [file pcbi.1000382.s002.xls]

## Sheet: NME_11K
Gene	P060	P135	P195	P280	P03m	P07m	P12m	P20m	P25m	P30m	W060	W135	W195	W280	W03m	W07m	W12m	W20m	W25m	W30m
11-beta-HSD3	9.748	9.811	8.525	6.886	7.739	7.858	8.143	7.697	8.073	8.403	9.85	9.567	8.757	7.686	7.371	7.482	8.278	7.729	8.363	8.333
5-OPase	4.975	5.135	5.206	4.997	4.947	5.144	5.07	4.772	4.975	5.135	5.251	4.995	5.148	5.38	4.97	4.936	5.461	5.091	5.223	5.402
A4GALT	4.974	5.407	5.345	5.312	5.768	5.789	5.249	5.172	5.219	5.453	5.338	4.808	4.974	5.636	5.507	5.151	5.443	5.168	5.454	5.338
A4GNT	4.277	4.56	4.789	4.944	4.644	4.589	4.634	4.695	4.73	4.682	4.785	4.482	4.733	4.903	4.62	4.772	4.733	4.986	4.727	4.773
AAAS	8.396	8.224	7.831	6.624	7.85	8.019	7.276	7.055	7.681	8.462	8.544	8.045	7.596	7.1	7.623	7.47	7.466	7.354	8.034	8.175
AACS	10.961	11.265	10.264	8.633	8.831	8.991	8.808	8.483	8.917	8.615	10.936	10.632	10.38	9.278	8.854	8.807	8.815	8.555	9.479	8.896
AADAT	8.959	9.034	8.849	8.683	8.875	8.899	8.732	8.505	8.927	8.809	9.111	8.643	8.815	8.716	9.047	8.768	8.914	8.547	9.138	8.944
AAK1	11.991	11.978	11.102	9.253	10.625	10.359	10.33	10.356	10.043	10.534	12.026	11.765	11.317	10.392	10.042	9.916	10.574	10.432	10.274	10.635
AAMP	11.698	12.381	12.21	12.021	11.896	12.191	12.289	11.937	11.962	12.306	11.659	11.96	11.963	12.56	11.705	11.909	12.101	11.994	12.103	12.362
AANAT	8.143	7.934	7.778	7.912	8.094	8.278	7.886	7.473	7.966	8.582	8.003	7.571	7.682	8.14	7.962	7.772	8.177	7.85	8.412	8.278
AARS	13.231	13.849	13.973	14.63	14.484	14.571	14.536	13.987	14.143	14.333	13.276	13.618	14.034	15.094	14.278	14.402	14.503	14.158	14.463	14.49
AARSL	10.36	11.019	10.949	10.527	10.651	10.775	10.924	10.327	10.643	10.62	10.527	10.597	10.742	10.896	10.537	10.768	11.033	10.592	10.965	10.757
AASDHPPT	7.79	7.73	7.062	5.703	5.87	5.92	5.867	5.588	5.888	5.974	7.851	7.36	6.974	6.146	5.623	5.729	6.147	5.82	6.085	6.076
AASS	6.045	6.384	6.561	6.566	5.618	5.776	6.262	5.996	5.762	5.756	5.819	6.943	6.408	6.466	5.674	6.222	6.127	6.023	6.044	5.568
AATF	7.948	8.429	8.559	8.885	8.125	8.314	8.233	7.817	8.39	8.964	8.275	8.36	8.22	9.153	7.931	7.823	8.229	8.03	8.62	9.025
ABAT	8.413	8.373	7.761	7.335	7.885	8.139	7.889	7.686	7.833	8.092	8.61	7.994	7.615	7.794	7.734	7.779	8.087	7.736	8.112	8.152
ABCA1	8.146	8.262	7.919	6.552	6.627	6.228	6.746	6.343	6.581	6.655	8.344	7.752	7.597	6.87	6.37	6.599	6.543	6.618	6.401	6.834
ABCA3	8.902	8.906	7.83	7.513	7.564	7.261	7.302	7.387	6.883	7.06	8.199	8.204	7.217	7.441	7.679	7.406	7.442	7.59	7.084	7.126
ABCA4	5.629	5.756	5.675	5.767	5.545	5.647	5.466	5.352	5.55	5.66	6.035	5.249	5.574	5.981	5.535	5.794	5.778	5.629	5.584	5.871
ABCA8	7.737	8.306	8.599	8.041	7.795	7.197	6.978	6.604	6.612	7.193	8.068	8.074	8.271	7.956	7.418	6.771	6.94	6.761	6.996	7.408
ABCB10	11.359	11.171	10.63	10.973	11.008	11.166	11.368	10.9	10.818	11.089	11.147	10.921	10.776	11	10.908	11.059	11.215	11.133	10.949	11.249
ABCB7	7.787	8.071	8.408	8.254	9.091	9.461	8.823	8.518	8.783	9.107	7.897	8.007	7.981	8.463	8.921	8.903	9.196	8.69	9.19	8.894
ABCB8	6.574	6.998	6.743	7.147	7.034	7.051	6.503	6.552	6.863	6.928	6.811	6.564	6.641	7.474	6.822	6.697	6.707	6.723	7.143	6.96
ABCB9	8.497	9.006	7.422	7.428	8.628	8.366	7.62	7.529	8.187	8.152	8.954	8.989	7.309	7.567	8.496	7.994	8.068	7.661	8.532	8.236
ABCC1	6.662	6.821	7.053	9.149	8.023	7.85	8.299	7.679	7.676	7.704	6.636	6.682	6.732	8.558	7.887	7.984	8.017	8.065	7.651	7.443
ABCC3	8.361	8.616	8.311	7.084	7.812	7.73	7.729	7.508	7.697	7.877	8.471	8.123	8.533	8.282	7.479	7.395	8.011	7.511	7.916	8.388
ABCC4	10.748	10.813	10.476	10.331	10.213	10.885	10.769	10.194	9.544	10.177	10.622	10.442	10.518	9.334	9.433	10.137	10.874	10.899	10.7	10.401
ABCC5	12.532	12.511	12.212	11.675	12.71	12.287	12.272	12.337	12.344	12.975	12.426	12.169	12.093	11.977	11.968	11.88	12.704	12.39	12.455	12.756
ABCC8	11.52	10.628	10.815	10.742	10.712	11.922	11.075	10.138	9.817	10.225	10.787	10.571	11.406	11.791	11.048	11.596	11.086	11.162	9.914	9.993
ABCC9	6.546	7.076	7.855	6.385	7.547	7.82	7.482	7.161	7.333	7.595	7.479	7.851	7.443	6.749	7.364	7.544	7.763	7.294	7.658	7.614
ABCD1	9.313	10.938	10.676	10.242	11.492	12.081	11.624	11.502	11.975	11.854	9.635	10.284	10.794	10.936	11.186	11.656	11.881	11.672	12.223	11.94
ABCD3	4.475	4.377	4.387	4.342	4.902	4.84	4.65	4.728	4.709	4.991	4.339	4.037	4.263	4.518	4.658	4.609	4.886	4.924	4.817	5.238
ABCD4	10.693	10.595	9.869	8.146	9.003	8.699	9.203	8.355	8.699	8.493	10.912	10.115	9.712	8.581	8.933	8.707	9.214	8.392	8.897	8.584
ABCF1	13.197	13.512	13.44	14.161	13.968	14.235	14.452	13.874	13.87	14.081	13.253	13.485	13.611	14.7	13.916	14.18	14.207	13.964	14.06	14.326
ABCF2	11.989	12.021	11.475	13.39	13.484	13.744	13.16	13.336	13.384	14.033	12.244	11.746	11.666	13.775	13.219	13.531	13.195	13.397	13.53	14.008
ABCF3	6.771	6.808	6.942	7.661	7.668	8.032	6.951	7.22	7.111	7.55	6.801	6.692	7.042	7.771	7.676	7.565	7.558	7.513	7.626	7.755
ABCG4	6.165	6.422	6.621	5.335	5.321	5.604	5.848	5.623	5.648	5.49	6.005	6.353	6.456	5.651	5.491	5.506	5.749	5.611	5.732	5.467
ABCG5	5.481	5.08	5.215	5.482	5.032	4.789	4.351	4.323	4.822	4.767	4.908	4.463	5.148	5.479	4.815	4.744	4.952	4.442	4.66	4.54
ABHD10	8.271	8.63	8.272	7.264	8.476	8.919	9.095	8.413	9.034	8.781	8.147	8.22	8.155	7.961	8.394	8.661	9.053	8.446	9.349	8.833
ABHD11	11.59	12.839	11.807	10.882	10.333	10.551	10.228	9.948	10.494	10.76	12.092	11.893	11.704	11.529	10.472	10.348	10.42	10.054	10.89	10.848
ABHD2	8.702	8.817	8.332	7.401	8.175	7.665	8.171	7.719	7.784	8.165	8.679	8.251	8.509	7.542	7.869	8.048	7.726	8.468	8.021	8.33
ABHD3	6.893	6.964	6.552	6.102	7.282	6.623	6.293	6.493	6.681	7.061	6.594	6.557	6.626	7.174	7.209	6.655	6.62	7.186	7.12	7.527
ABHD4	10.875	11.493	12.168	13.578	12.786	12.224	13.169	12.078	12.43	12.788	10.765	10.944	11.75	12.598	12.216	12.099	12.568	12.388	12.769	13.034
ABHD5	6.512	7.445	7.042	8.788	9.221	8.699	8.571	7.932	8.145	8.656	7.046	6.729	7.254	8.299	8.841	8.301	8.716	8.295	8.65	9.003
ABHD6	8.758	9.3	7.571	8.452	8.938	8.86	8.915	8.44	8.797	10.019	8.298	7.842	7.769	8.519	8.636	8.834	8.885	8.869	9.158	10.314
ABHD8	11.644	11.908	10.99	10.578	10.422	10.992	10.685	10.193	10.335	10.945	11.524	11.352	11.188	10.883	10.226	10.699	10.828	10.697	10.819	11.113
ABHD9	9.005	9.107	8.455	7.573	7.615	7.729	8.01	7.485	8.031	8.349	9.093	8.595	8.485	8.334	7.614	7.859	8.115	7.663	8.223	8.585
ABI1	8.201	8.403	8.117	7.346	7.587	8.299	7.519	7.957	7.489	7.637	8.295	7.992	7.834	7.605	8.135	7.445	7.629	7.821	7.471	7.676
ABI3	5.687	6.632	7.376	5.628	7.175	7.046	6.328	6.284	6.716	6.863	5.909	6.412	6.944	6.157	6.973	6.623	6.792	6.55	7.069	6.673
ABL1	8.355	8.171	8.569	8.417	8.306	8.35	7.938	7.879	8.023	8.221	8.396	8.115	8.383	8.441	8.121	7.995	8.093	8.075	8.314	8.156
ABL2	6.35	6.031	5.591	5.009	4.636	4.893	4.788	4.496	4.649	4.877	6.308	5.871	5.178	5.503	4.784	5.043	4.59	5.019	4.713	4.803
ABLIM1	11.675	12.267	12.028	10.631	10.979	10.92	11.338	10.826	10.992	11.754	12.164	11.867	12.079	10.961	10.594	10.605	11.146	10.92	11.231	11.807
ABLIM2	11.929	10.155	10.078	8.211	8.656	8.712	8.498	8.008	7.889	8.329	12.497	10.981	9.794	8.351	8.468	8.225	8.351	7.933	8.165	8.325
ABLIM3	6.574	6.162	6.428	6.03	6.214	6.215	6.179	6.078	6.103	6.376	6.899	6.456	6.241	6.187	6.048	6.207	6.472	6.562	6.558	6.764
ABO	4.722	5.105	5.07	4.706	4.979	5.076	4.855	4.653	4.827	4.546	4.649	4.746	4.992	4.688	4.552	4.65	5.072	4.883	4.935	4.732
ABP1	5.17	5.282	5.174	5.163	5.9	6.075	5.331	5.421	5.836	5.855	4.666	4.739	5.408	5.722	5.735	6.019	5.61	5.403	6.067	5.922
ABR	9.379	9.395	9.021	7.759	8.098	8.438	7.889	8.115	8.108	8.577	9.441	8.956	8.908	8.383	8.102	8.327	8.238	8.469	8.513	8.774
ABTB1	8.272	8.999	9.108	7.227	7.674	7.429	7.611	7.085	7.142	7.707	8.214	8.715	8.642	7.371	7.218	6.721	7.662	7.113	7.247	7.603
ABTB2	7.635	7.923	7.601	5.659	6.628	6.585	6.665	6.44	6.314	6.614	7.847	8.147	7.622	7.078	6.708	6.429	6.767	7.169	6.237	6.671
ACAA1	11.709	12.57	12.143	11.755	12.24	12.503	12.386	11.75	12.068	12.481	11.964	11.766	11.712	12.284	12.132	12.13	12.413	11.989	12.429	12.447
ACAA2	12.655	14.078	13.358	13.312	13.436	13.59	13.741	13.419	13.404	13.66	13.294	13.241	13.36	13.86	13.393	13.48	13.792	13.686	13.847	13.986
ACACA	10.518	11.555	9.844	9.052	8.677	9.27	8.774	8.967	9.7	9.376	10.592	10.599	9.987	9.85	8.743	9.103	8.838	9.417	10.675	10.074
ACACB	7.582	7.329	7.631	7.462	7.481	7.569	7.337	7.002	7.031	7.684	7.592	7.248	7.336	7.85	7.334	7.432	7.279	7.063	7.099	7.541
ACAD10	8.834	10.317	9.964	9.529	9.681	9.338	10.284	9.422	9.722	9.342	9.387	9.69	10.354	9.676	9.843	9.774	10.912	9.71	10.41	10.167
ACAD8	8.041	8.425	8.859	7.763	8.719	8.76	8.675	8.138	8.32	8.532	8.417	8.713	8.337	8.075	8.279	8.559	9.401	8.328	8.534	8.766
ACAD9	10.511	10.967	10.664	9.474	9.359	9.437	9.419	9.167	9.291	9.731	10.583	10.655	10.33	9.779	9.283	9.225	9.363	9.344	9.506	9.821
ACADL	6.787	7.529	7.306	7.345	7.398	7.841	7.924	7.754	7.855	8.627	6.89	7.428	7.296	8.223	7.034	7.524	7.261	7.843	8.035	8.754
ACADS	10.111	12.645	12.386	13.139	13.304	13.198	13.327	13.063	13.245	13.842	10.544	11.64	12.457	13.45	13.209	13.013	13.714	13.339	13.66	14.004
ACADSB	10.484	11.44	10.815	11.043	11.3	11.646	11.385	11.427	11.534	11.86	10.586	10.77	10.684	11.607	11.474	11.738	12.013	11.778	12.057	12.212
ACADVL	12.291	14.005	13.956	15.293	15.01	15.091	15.053	14.754	14.614	15.582	12.521	13.193	13.918	15.978	14.757	14.881	15.06	15.03	15.115	15.644
ACAT1	7.192	8.536	8.161	6.796	7.602	7.722	7.596	7.361	7.485	7.999	7.288	8.266	6.902	7.297	7.565	7.632	8.089	7.811	8.095	8.346
ACBD4	9.006	10.457	10.047	9.068	9.624	10.058	10.244	9.693	9.878	10.205	9.204	9.767	10.035	9.957	9.378	9.851	10.714	9.963	10.39	10.189
ACBD5	6.347	6.956	7.007	6.014	7.63	8.202	7.448	7.518	7.778	8.254	6.674	6.846	7.039	6.567	7.31	7.485	7.741	7.608	7.975	8.306
ACBD7	10.547	8.116	7.432	5.879	6.998	7.195	8.325	7.302	7.647	7.362	8.339	7.552	7.319	6.216	7.318	7.366	8.616	7.333	7.804	7.522
ACCN1	5.5	5.149	5.248	4.875	4.832	4.958	4.943	4.772	4.896	4.659	4.976	5.185	4.74	5.147	4.571	4.568	5.233	4.624	4.906	4.777
ACCN2	5.986	5.519	5.43	5.144	5.228	5.223	5.039	4.895	5.265	5.253	5.516	4.883	5.305	5.332	5.093	4.868	5.166	5.143	5.363	5.282
ACCN3	10.737	11.041	10.756	10.395	10.378	10.48	10.386	10.166	10.633	10.919	10.984	10.595	10.659	11.041	10.347	10.419	10.672	10.757	11.251	11.278
ACCN4	7.998	8.564	6.287	6.025	5.933	6.14	6.012	5.671	6.036	5.958	7.384	7.491	6.182	6.064	6.397	5.997	5.941	5.949	6.108	6.004
ACE	4.599	5.126	4.959	5.036	5.02	5.026	4.951	4.842	4.976	5.039	4.815	4.876	4.701	5.339	4.746	4.672	4.927	4.875	5.028	5.054
ACE2	4.591	6.039	5.693	5.212	5.69	5.785	5.341	5.026	5.346	5.449	4.814	5.465	5.545	5.51	5.913	5.492	5.34	5.4	5.31	5.58
ACHE	6.649	6.515	8.524	4.657	4.711	5.37	4.621	4.624	5.075	4.816	6.501	6.628	8.302	5.049	4.452	4.848	4.74	4.652	5.255	4.93
ACIN1	7.952	8.084	8.224	7.161	7.171	7.318	7.221	6.985	7.023	7.194	8.028	7.791	7.707	7.681	6.861	7.083	7.318	7.087	7.316	7.164
ACLY	13.132	13.634	11.395	9.118	9.768	9.552	9.482	9.457	10.045	9.896	13.048	12.342	11.906	9.872	9.833	9.736	9.465	9.818	11.467	10.591
ACMSD	4.653	5.526	4.781	4.661	4.821	4.944	5.035	5.04	5.473	5.538	4.766	4.735	4.621	4.598	4.962	4.531	5.156	5.444	5.613	5.629
ACO1	8.423	8.367	8.24	8.282	8.128	8.399	7.51	7.648	7.916	8.207	8.468	8.135	8.205	8.793	8.199	8.037	7.729	7.869	8.199	8.423
ACO2	13.643	15.382	15.293	16.853	16.834	17.008	16.617	16.495	16.476	16.862	13.857	14.694	15.382	16.675	16.661	16.641	17.196	16.792	17.037	16.944
ACOT9	10.334	10.623	10.434	9.1	9.809	9.834	9.87	9.537	9.733	9.994	10.433	10.33	10.321	9.631	9.645	9.643	9.835	9.53	9.966	10.089
ACOX1	7.819	8.438	8.391	8.881	9.484	9.427	9.222	8.541	8.799	9.065	8.131	7.948	8.369	9.099	9.345	9.047	9.516	8.726	9.2	9.146
ACOX2	5.759	7.206	7.319	5.289	6.858	6.498	6.403	6.193	6.481	6.941	6.029	6.465	6.879	6.159	6.471	6.402	6.425	6.394	6.742	7.005
ACOX3	11.259	11.769	10.749	11.868	11.193	10.396	10.781	10.025	9.918	10.604	11.474	11.13	10.742	11.57	10.411	10.071	11.186	10.195	10.463	11.075
ACP2	7.427	8.448	8.162	5.892	6.123	6.055	5.92	5.546	6.183	6.412	7.812	8.095	8.332	6.963	6.049	6.082	5.861	5.731	6.425	6.578
ACP5	10.339	11.761	11.015	8.482	9.571	9.325	9.276	8.928	9.51	9.689	10.537	11.224	11.33	9.074	9.202	9.296	9.277	9.223	9.651	9.7
ACP6	9.978	9.923	9.981	9.227	10.544	10.595	11.004	10.503	10.528	10.566	10.498	9.796	9.984	9.515	10.378	10.523	11.193	10.54	10.802	10.683
ACPL2	10.345	10.008	9.378	8.462	9.081	8.929	8.95	8.472	8.483	8.622	10.18	9.786	9.453	8.925	8.755	8.756	8.926	8.468	8.52	8.659
ACPT	5.414	5.129	4.902	4.798	4.81	4.819	5.136	5.054	4.838	4.766	5.053	4.874	4.639	4.916	4.642	4.591	5.207	4.94	5.129	4.923
ACR	4.128	4.37	4.891	4.812	4.87	4.779	4.987	4.58	5.028	4.815	4.738	4.076	4.485	4.644	4.551	4.498	4.613	4.83	4.629	4.943
ACRBP	7.747	7.529	6.435	5.06	5.683	5.783	5.357	5.066	5.871	5.704	7.917	7.254	6.649	5.635	5.522	5.349	5.454	5.473	6.045	5.713
ACRP30	4.989	9.199	4.378	4.826	6.391	7.369	5.635	7.097	8.07	8.775	4.608	8.308	6.031	5.748	5.765	7.733	6.035	7.848	9.389	9.694
ACRV1	4.763	5.02	4.995	5.131	5.197	5.085	5.053	4.904	4.949	5.024	5.106	4.449	4.795	5.471	4.939	5.088	5.196	5.072	5.192	5.159
ACS	10.858	11.359	10.871	9.086	9.086	9.129	8.826	8.89	9.183	9.461	11.214	11.065	10.827	9.608	9.122	9.096	8.936	9.14	9.51	9.664
ACSL1	11.954	13.223	13.149	14.087	14.698	14.22	14.26	14.104	14.237	14.95	12.11	12.321	13.37	15.135	14.073	13.994	14.269	14.34	14.508	15.359
ACSL3	6.919	7.147	6.589	6.063	6.252	6.459	6.069	6.16	6.361	6.915	7.174	6.726	6.496	6.617	6.359	6.358	6.055	6.442	6.688	6.895
ACSL4	11.352	11.416	10.543	11.82	11.509	11.327	11.419	11.019	11.261	11.362	10.963	10.929	10.848	11.829	11.466	11.333	11.489	11.445	11.629	11.526
ACSL5	8.555	10.975	10.329	9.521	10.25	9.885	9.683	9.567	9.987	9.695	8.883	9.726	10.684	10.485	10.255	10.236	9.632	9.748	10.32	10.003
ACSL6	5.765	5.663	5.168	4.982	4.925	5.182	5.259	5.023	5.2	5.084	5.559	5.268	5.212	5.072	5.19	4.837	5.349	5.506	5.338	5.046
ACTA1	15.714	14.688	17.013	16.77	16.873	17.009	16.555	16.665	16.612	16.573	16.851	17.097	16.958	17.007	16.798	16.697	17.061	16.858	16.859	16.747
ACTA2	14.176	15.115	14.144	11.477	12.405	12.879	11.988	11.997	12.336	13.119	14.402	14.54	14.098	12.62	12.83	12.994	12.113	12.6	12.757	13.335
ACTB	15.187	15.92	15.154	12.866	13.731	14.258	13.47	13.531	13.96	13.639	15.713	15.252	15.124	13.771	13.794	14.15	13.848	13.655	14.199	13.744
ACTC	16.363	15.204	17.487	12.233	11.914	10.962	10.855	10.37	11.467	10.92	17.212	16.984	16.34	13.529	12.119	10.172	10.955	11.243	12.264	12.439
ACTG1	16.396	16.01	15.562	13.558	14.114	14.373	14.031	13.846	14.111	14.096	16.498	15.629	15.475	14.06	14.558	14.428	14.469	13.972	14.563	14.251
ACTG2	8.09	8.951	8.377	9.092	8.91	9.359	8.67	8.473	8.751	9.165	7.527	8.271	8.092	9.197	8.933	8.976	9.001	8.814	9.095	9.215
ACTL6A	10.531	10.262	8.943	10.063	8.491	9.249	9.397	8.913	8.759	9.132	10.786	10.099	9.588	9.971	7.9	8.572	8.939	8.89	8.757	9.146
ACTL6B	10.892	10.842	11.081	10.191	10.853	10.938	10.642	10.362	10.556	10.562	10.739	10.516	10.913	10.528	10.764	10.632	10.678	10.402	10.813	10.503
ACTL7A	5.377	5.387	5.716	5.413	5.581	5.384	5.213	5.137	5.17	5.314	5.776	4.914	5.227	5.653	5.368	5.025	5.328	5.29	5.361	5.266
ACTL7B	7.829	8.416	8.344	7.304	7.984	7.79	7.912	7.69	7.908	8.09	8.049	8.157	8.268	7.787	7.608	7.969	7.947	7.838	8.276	8.211
ACTN1	11.532	11.696	10.359	9.391	9.991	9.827	9.364	9.071	9.412	9.835	11.609	10.881	10.455	10.004	10.076	9.827	9.341	9.323	9.751	10.042
ACTN2	13.15	12.063	14.935	15.031	14.931	15.153	15.069	14.924	14.897	15.135	13.961	14.269	15.048	15.732	15.272	15.204	15.43	15.582	15.257	15.53
ACTN3	8.62	10.285	15.246	16.215	17.189	17.564	16.932	16.751	16.605	16.637	9.044	11.008	14.563	16.205	16.799	16.837	17.017	16.578	16.778	16.313
ACTN4	17.161	17.101	17.507	17.205	16.987	17.095	16.961	16.795	16.681	16.933	17.288	17.14	16.916	17.101	16.755	16.852	17.093	16.988	16.975	16.779
ACTR10	9.502	9.301	8.925	7.47	7.691	8.088	8.118	7.92	7.929	8.448	9.413	9.289	9.102	8.144	7.735	8.352	8.122	8.339	8.312	8.734
ACTR1A	13.091	13.257	12.57	12.449	12.973	13.368	12.924	12.745	13.104	13.476	13.23	12.931	12.607	12.976	12.872	13.14	13.154	13.015	13.515	13.559
ACTR3	10.913	11.047	10.918	9.613	9.619	9.858	9.553	9.31	9.494	9.846	10.997	11.115	10.849	10.344	9.663	9.805	9.664	9.6	9.834	10.081
ACTR6	9.792	9.683	9.22	8.718	8.661	8.777	8.872	8.545	8.631	9.232	9.714	9.564	9.221	9.427	8.475	8.775	8.791	8.584	8.851	9.279
ACTR8	10.855	11.069	10.623	10.505	11.045	11.048	11.107	10.639	10.656	11.156	10.963	10.426	10.58	10.928	10.619	10.881	11.037	10.749	10.943	11.276
ACVR1	9.235	8.777	8.781	6.758	8.046	8.17	7.968	7.965	8.005	8.939	9.247	8.953	8.924	7.003	7.777	7.901	7.963	8.222	8.272	8.975
ACVR2	8.905	8.697	8.791	6.976	8.291	8.493	8.422	7.729	8.041	8.209	8.854	8.808	8.412	7.833	8.069	8.184	8.601	7.879	8.355	8.072
ACYP1	5.265	4.986	4.905	4.651	5.065	5.097	5.112	4.953	5.344	5.688	4.794	4.733	4.733	5.356	5.133	5.016	5.239	5.209	5.62	5.76
ACYP2	6.85	8.179	9.159	10.669	11.688	12.093	11.859	11.854	11.739	12.215	7.075	8.195	9.075	11.024	11.458	11.749	11.85	12.024	11.934	12.079
ADA	10.849	11.356	12.392	11.532	11.689	11.644	10.759	11.146	11.274	11.851	10.881	11.354	12.375	11.882	11.897	11.607	11.385	11.576	11.629	11.796
ADAM10	10.571	10.701	10.772	9.184	9.726	9.828	9.56	9.368	9.406	10.004	10.53	10.477	10.506	9.734	9.537	9.651	9.87	9.516	9.734	9.998
ADAM11	5.779	4.774	4.281	4.308	4.885	4.598	4.697	4.659	4.772	4.748	5.006	4.546	4.322	4.637	4.454	4.542	4.75	4.946	4.809	4.981
ADAM12	10.075	10.627	9.074	5.628	6.045	6.146	5.272	5.901	6.015	5.991	10.775	10.056	9.133	5.723	6.495	6.134	6.068	5.763	6.204	6.046
ADAM17	5.757	5.977	5.686	4.942	5.63	5.496	4.734	4.901	5.255	5.31	6.058	5.477	5.691	5.519	5.333	5.132	5.147	4.954	5.181	5.423
ADAM19	6.968	6.839	6.96	6.103	6.399	6.588	5.942	5.986	5.951	5.916	7.35	6.792	6.902	6.803	6.619	6.494	6.299	6.104	6.077	6.12
ADAM22	6.134	5.471	5.681	5.132	5.171	5.411	4.855	5.09	5.27	5.079	5.838	5.536	5.318	5.546	5.145	5.054	5.143	5.152	5.224	5.056
ADAM23	8.367	6.338	5.449	4.551	4.703	4.969	4.295	4.395	4.413	4.666	6.65	5.933	5.706	4.7	4.239	4.369	4.642	4.6	4.48	4.605
ADAM28	6.702	7.179	7.077	6.28	6.043	6.598	5.963	6.065	6.186	6.421	6.903	7.395	6.693	5.67	6.279	6.315	6.196	6.432	6.069	6.268
ADAM30	5.417	5.524	5.775	5.557	5.268	5.329	5.38	4.996	5.375	5.529	5.917	5.349	5.49	5.838	5.196	5.371	5.554	5.283	5.293	5.584
ADAMTS1	12.438	12.159	11.329	11.457	11.404	11.369	11.242	10.731	10.653	10.934	12.606	11.28	11.433	11.36	11.631	11.351	11.883	11.013	11.084	11.04
ADAMTS10	7.478	7.038	7.216	5.939	5.805	5.555	4.967	5.165	5.527	6.318	7.333	7.127	7.011	5.712	5.703	5.156	5.472	5.362	5.667	6.331
ADAMTS14	5.905	5.474	5.3	4.54	4.61	4.746	4.604	4.378	4.871	4.979	6.209	5.354	4.821	4.972	4.402	4.63	4.76	4.677	4.863	4.937
ADAMTS15	9.503	9.942	9.562	7.434	7.89	8.142	7.58	7.793	7.894	8.483	9.805	9.747	9.474	7.938	7.872	8.014	8.043	8.098	8.28	8.514
ADAMTS17	7.944	7.569	7.92	7.666	7.724	7.413	7.698	7.398	7.474	7.631	8.302	7.549	7.58	7.599	7.718	7.348	7.734	7.566	7.459	7.689
ADAMTS18	5.593	6.199	5.403	4.279	4.59	4.351	4.728	4.335	4.719	4.509	5.35	5.338	5.397	4.599	4.521	4.456	4.609	4.796	4.796	4.529
ADAMTS19	7.401	8.753	6.662	4.54	4.663	4.491	4.698	4.411	4.745	4.835	7.841	8.393	6.811	4.985	4.664	4.419	4.819	5.334	4.843	4.977
ADAMTS2	6.824	7.015	6.796	5.056	6.009	5.914	4.825	5.441	5.628	5.37	6.889	7.078	7.4	5.691	6.064	5.542	5.434	5.304	5.73	5.672
ADAMTS20	5.804	5.81	5.673	5.17	5.418	5.593	5.478	5.483	5.186	5.497	6.169	5.834	5.604	5.552	6.177	5.527	5.58	5.792	5.24	5.351
ADAMTS4	10.204	10.63	9.431	6.863	6.901	6.479	5.407	6.582	6.268	6.503	10.405	10.121	9.748	6.748	7.363	6.511	6.827	6.713	6.46	6.852
ADAMTS5	7.908	8.151	7.317	7.264	7.449	7.236	6.623	6.489	6.46	6.898	8.242	7.844	7.433	7.498	7.13	6.83	7.154	6.695	6.888	6.909
ADAMTS6	7.603	6.739	6.447	5.504	6.023	6.04	5.765	5.546	5.613	5.609	7.546	6.529	6.528	5.521	5.76	5.602	5.89	5.803	5.577	5.616
ADAMTS7	9.419	9.421	9.044	7.537	7.918	7.766	7.465	7.305	7.545	7.529	9.734	8.98	8.823	7.962	7.727	7.442	7.687	7.49	7.783	7.501
ADAMTS8	6.138	6.753	7.391	6.556	7.9	7.555	7.097	7.103	6.585	6.562	6.628	7.025	7.499	6.796	7.95	7.634	7.162	7.198	6.668	6.599
ADAMTS9	10.742	10.285	9.983	8.725	8.318	7.989	7.022	7.693	7.606	7.87	10.936	9.959	10.161	8.016	8.486	8.104	7.947	7.793	8.129	7.786
ADAR	8.139	8.467	8.254	7.528	7.676	7.993	7.638	7.687	7.427	7.407	8.266	7.944	7.912	7.468	7.658	7.948	7.788	7.679	7.585	7.405
ADARB1	7.327	7.441	7.169	7.152	7.13	6.994	6.524	6.159	6.659	6.735	7.776	7.111	7.172	7.356	7.12	6.513	6.75	6.371	6.854	7.017
ADARB2	5.845	5.109	4.808	5.434	4.702	4.864	5.082	4.383	4.348	5.565	4.757	4.625	4.964	5.037	4.622	4.545	5.041	4.983	4.605	5.312
ADAT1	10.465	10.571	10.221	9.621	9.268	9.425	9.116	8.924	9.032	9.382	10.645	10.204	10.249	10.065	9.262	9.286	9.327	9.112	9.386	9.538
ADCK1	6.071	6.089	7.128	7.486	9.103	9.492	9.493	9.498	9.232	9.715	6.708	6.743	6.899	8.604	8.922	8.903	9.299	9.394	9.079	9.351
ADCK2	11.127	11.396	10.858	11.486	11.361	11.356	11.177	10.785	11.272	11.308	11.226	10.988	10.951	12.157	11.165	11.266	11.406	11.123	11.69	11.465
ADCK4	5.244	5.217	4.987	5.132	4.815	4.943	4.862	4.668	4.706	4.961	5.352	5.11	4.964	5.452	4.655	4.763	4.889	4.717	4.847	5.101
ADCY1	7.821	6.013	5.772	4.993	5.556	5.971	5.873	5.579	5.884	5.756	6.4	5.564	5.575	5.02	5.727	6.121	5.895	6.022	6.001	5.698
ADCY2	11.31	11.111	10.585	9.757	10.052	10.113	10.028	9.607	9.797	9.811	11.381	11.454	10.664	9.927	9.957	10.085	10.133	9.821	10.061	9.848
ADCY3	11.366	10.635	10.245	8.182	8.112	7.413	6.307	7.027	6.903	7.637	10.982	10.644	10.263	8.538	7.792	7.377	7.39	7.083	7.794	7.584
ADCY5	8.391	7.877	7.314	6.383	7.141	7.128	6.765	6.446	6.701	7.107	8.487	7.391	7.266	6.714	6.995	6.835	6.959	6.723	6.927	7.205
ADCY6	11.231	12.284	11.221	11.852	9.972	9.285	9.321	9.293	9.273	10.198	11.013	11.667	11.56	12.007	9.66	9.357	9.615	9.493	9.884	10.582
ADCY7	10.211	10.907	10.888	6.957	9.099	8.953	9.051	8.966	9.074	9.128	10.404	11.113	11.342	8.239	8.916	8.918	9.024	9.03	9.155	9.052
ADCY8	8.839	7.453	7.206	6.487	6.068	6.083	5.826	5.703	6.211	6.35	7.697	6.863	7.424	6.423	6.035	5.814	5.603	5.835	6.284	6.417
ADCYAP1R1	9.526	9.268	8.218	6.887	6.886	6.715	6.822	6.733	6.366	6.642	7.539	7.548	8.33	7.178	6.735	6.942	6.906	6.8	6.905	6.643
ADD1	4.929	5.239	4.933	4.384	4.748	4.761	4.876	4.466	4.525	4.735	5.165	4.679	4.661	4.611	4.375	4.624	4.434	4.624	4.505	4.783
ADD3	12.739	13.056	12.238	11.058	11.681	11.636	11.58	11.036	11.055	11.03	12.754	12.443	12.413	11.957	11.721	11.7	11.738	11.198	11.456	11.259
ADFP	10.517	10.817	9.716	8.219	7.882	7.445	7.213	7.557	7.819	8.599	10.775	10.088	9.83	9.252	7.697	7.568	7.667	8.058	8.566	10.362
ADH1C	4.844	4.894	4.805	4.374	4.519	4.836	4.723	4.74	4.379	4.527	4.719	4.985	4.264	4.947	4.272	4.572	4.509	4.69	4.56	4.509
ADH4	8.199	8.322	8.258	8.078	8.61	8.908	9.008	8.511	8.62	8.651	8.085	8.452	8.871	8.572	8.866	9.047	8.62	8.978	8.605	9.028
ADH5	12.197	12.729	11.616	9.109	10.74	11.04	10.798	10.775	11.005	11.097	12.305	12.154	11.803	10.038	10.742	11.117	10.741	10.763	11.09	11.248
ADHFE1	7.465	7.59	7.614	7.292	9.682	10.369	10.473	10.043	10.096	10.436	7.62	7.082	7.416	7.972	9.727	10.058	10.841	9.999	10.245	10.681
ADIPOR1	12.772	13.189	12.964	13.462	13.665	13.854	13.912	13.69	13.704	14.075	13.147	12.902	13.006	13.781	13.556	13.784	14.037	13.854	13.904	14.269
ADIPOR2	10.884	12.151	11.465	13.98	13.403	12.874	13.034	12.423	12.541	13.604	10.938	11.439	11.704	13.621	13.2	12.928	12.841	12.644	12.903	13.951
ADM	9.29	10.452	10.05	9.771	9.716	8.938	9.338	8.961	8.967	9.329	9.133	9.582	9.919	9.704	9.559	8.971	9.728	9.068	9.318	9.865
ADMR	7.567	7.895	8.589	8.942	8.697	8.761	8.786	8.302	8.696	9.098	7.843	7.777	8.525	9.185	8.584	8.532	8.963	8.657	9.112	9.082
ADNP	9.403	9.283	8.972	7.271	7.657	7.862	7.717	7.374	7.511	7.681	9.56	8.949	8.629	7.62	7.421	7.515	7.738	7.367	7.639	7.574
ADORA1	6.191	7.182	5.936	6.364	6.132	6.499	6	6.005	5.962	6.466	6.347	6.113	5.556	6.823	5.9	6.072	6.002	6.028	6.256	6.711
ADORA2A	11.533	12.32	11.928	10.48	10.554	10.704	10.874	10.272	10.257	10.251	11.672	12.003	12.063	10.78	10.382	10.601	10.868	10.386	10.487	10.204
ADORA2B	5.507	5.269	5.604	5.408	5.709	5.702	5.48	5.205	5.43	5.657	5.732	5.132	5.375	5.828	5.536	5.407	5.681	5.535	5.615	5.621
ADORA3	5.891	6.443	6.173	5.549	5.83	5.935	5.593	5.375	5.833	5.448	6.191	6	6.199	6.003	5.695	5.792	5.843	5.575	5.948	5.605
ADP50	10.185	10.882	10.958	10.011	10.374	10.052	10.274	9.727	9.731	9.987	10.31	10.475	10.783	10.316	10.059	9.738	10.256	9.924	10.032	10.04
ADPGK	7.344	7.39	7.094	5.864	6.204	6.39	6.126	6.1	6.032	6.074	7.509	7.033	7.15	6.535	6.07	6.434	6.189	6.331	6.303	6.314
ADPRH	5.713	6.552	6.783	5.628	5.872	6.247	5.611	5.692	5.855	6.347	5.961	6.45	6.714	6.084	5.882	6.102	5.812	5.802	6.018	6.356
ADPRHL1	9.184	9.522	12.517	11.764	11.064	10.688	9.9	10.055	10.214	10.973	9.973	11.295	12.781	11.635	11.019	10.393	9.928	10.302	10.37	10.913
ADPRHL2	10.076	10.084	10.175	8.806	9.273	9.711	9.703	9.237	9.284	9.473	10.215	9.971	10.01	9.5	9.095	9.501	9.898	9.427	9.58	9.596
ADRA1B	5.308	5.544	5.629	5.679	5.693	5.719	5.451	5.113	5.4	5.659	5.751	4.919	5.158	6.096	5.417	5.337	5.648	5.53	5.645	5.651
ADRA1D	5.867	6.026	6.9	5.009	5.653	5.82	5.13	5.132	5.507	5.511	6.045	6.028	6.887	5.566	5.614	5.406	5.677	5.393	5.817	5.569
ADRA2A	9.729	9.16	9.505	9.286	8.2	8.125	8.266	8.162	8.286	8.58	9.508	9.173	9.31	9.185	7.953	7.974	8.277	8.309	8.458	8.509
ADRB1	5.888	6.003	6.072	6.093	5.632	5.887	5.796	5.402	5.642	5.812	5.841	5.51	5.604	6.01	5.643	5.527	5.7	5.892	5.615	5.655
ADRB2	7.143	8.582	9.508	11.593	11.345	11.711	11.643	11.139	11.098	10.947	7.673	7.993	9.439	11.758	12.082	11.57	11.61	11.529	11.518	11.155
ADRB3	7.592	9.332	6.026	5.333	5.75	5.842	5.73	5.322	5.557	5.709	7.162	8.025	5.876	5.919	5.751	5.919	5.608	5.653	5.719	6.002
ADRBK1	11.251	11.623	11.415	10.468	10.923	11.429	11.219	10.76	10.776	11.117	11.311	11.367	11.315	10.788	10.813	11.193	11.228	10.963	11.087	11.117
ADRBK2	8.206	8.446	8.733	6.833	5.7	5.582	5.371	5.355	5.98	5.815	8.601	8.507	8.567	7.101	5.447	5.414	5.571	5.555	6.082	5.987
ADRM1	5.283	5.094	5.266	5.042	4.815	4.724	4.606	4.748	4.688	5.191	5.155	4.879	4.71	5.162	4.538	4.53	4.915	4.744	4.703	5.089
ADSS	10.666	10.914	9.996	9.204	9.075	9.164	9.194	8.894	9.17	9.297	10.899	10.534	10.402	10.37	9.026	9.351	9.025	9.094	9.322	9.464
ADSSL1	9.266	9.408	10.173	8.519	9.818	9.581	9.027	9.191	9.225	9.667	8.601	9.101	9.831	8.679	9.629	9.202	9.405	9.251	9.434	9.667
AEBP1	13.991	13.739	12.399	9.597	10.183	10.273	9.371	10.14	10.207	10.135	14.178	13.935	12.83	10.146	10.186	10.471	9.959	9.615	10.741	10.188
AEBP2	11.906	12.305	11.77	10.888	11.11	11.216	11.209	11.024	10.938	11.109	12.07	12.032	11.876	10.984	10.923	11.157	11.196	11.193	11.032	11.231
AES	13.525	13.785	13.422	11.892	12.335	12.845	12.764	12.407	12.495	13.143	13.36	13.321	13.64	12.46	12.272	12.689	13.029	13.004	13.044	13.354
AF013074	6.977	6.568	6.154	4.866	4.912	4.985	4.863	4.612	5.331	5.295	6.94	6.438	5.869	5.065	4.868	4.862	4.892	4.897	5.477	5.446
AF317556	7.614	8.417	7.513	6.372	6.339	7.068	6.232	5.76	6.007	6.508	9.277	8.435	7.454	7.003	7.326	6.612	8.82	6.732	6.689	7.241
AF451179	11.731	12.62	12.639	10.602	11.388	11.384	11.16	10.941	11.035	10.941	11.981	12.208	12.818	10.756	11.364	11.269	11.566	11.178	11.526	11.103
AF451181	11.81	12.099	11.679	10.904	10.757	10.483	10.862	10.329	10.11	10.954	11.709	11.619	11.574	11.342	10.278	10.417	10.706	10.262	10.372	10.828
AF451185	8.745	10.156	9.243	7.011	7.641	7.146	6.879	6.98	6.383	7.84	8.368	9.518	9.328	7.608	7.192	6.611	6.804	6.732	6.417	7.736
AF491290	4.926	4.744	4.979	4.621	5.189	5.597	4.564	4.726	5.285	5.528	4.757	4.528	4.907	4.692	4.98	4.918	4.908	4.768	5.559	5.39
AFG3L1	6.252	6.485	6.433	6.506	7.258	7.33	7.042	6.742	7.056	7.262	6.39	6.27	6.389	6.633	7.068	6.863	7.239	6.861	7.334	7.326
AFG3L2	12.436	12.672	11.829	11.188	11.78	12.005	11.575	11.409	11.628	11.821	12.662	12.322	12.021	11.668	11.98	11.838	12.007	11.716	12.114	11.959
AGC1	9.28	7.355	6.151	5.55	5.321	5.256	5.189	5.135	5.472	5.348	9.12	7.476	5.905	5.93	5.077	5.097	5.396	5.114	5.577	5.289
AGER	8.907	9.53	9.3	6.562	7.088	6.835	7.006	6.581	6.573	6.669	8.939	9.489	8.657	6.726	6.829	6.385	7.303	6.752	6.794	6.7
AGL	11.225	11.017	12.431	12.163	13.527	13.548	13.126	13.103	13.307	13.279	11.957	12.157	12.01	12.356	13.315	13.331	13.361	13.044	13.466	13.228
AGO2	8.519	8.677	8.762	9.978	9.6	9.579	9.101	9.033	8.944	10.139	8.702	8.428	8.423	10.362	9.13	9.247	8.716	9.114	8.921	10.058
AGO61	11.454	11.711	10.744	11.838	11.375	11.363	11.079	10.611	10.566	11.341	11.416	11.073	11.025	12.386	11.094	11.126	11.346	11.028	10.974	11.535
AGOUTI	11.236	10.786	10.604	9.674	9.242	9.386	9.378	8.805	8.962	9.33	11.237	10.597	10.161	9.904	8.984	9.162	9.116	8.768	8.95	9.174
AGPAT1	11.802	11.621	11.009	8.652	9.368	9.361	9.173	8.798	8.624	8.944	11.605	11.224	11.05	9.427	9.346	9.056	9.257	8.788	8.949	8.928
AGPAT4	11.334	11.848	11.067	6.371	7.723	7.692	7.092	7.204	7.223	7.108	11.218	11.543	11.007	7.385	7.675	7.346	7.739	7.309	7.822	7.168
AGPS	9.565	9.781	9.41	8.607	8.888	9.015	8.849	8.425	8.429	8.918	9.747	9.696	9.442	9.159	8.689	8.794	8.83	8.629	8.673	8.99
AGRN	10.456	10.475	10.651	7.869	9.693	9.945	9.463	8.925	9.312	9.439	10.19	10.416	10.564	8.38	9.974	10.306	9.348	9.09	9.304	9.425
AGRP	6.053	6.85	5.815	5.678	5.486	5.441	5.21	5.087	5.332	5.563	7.218	6.78	6.311	6.073	5.352	5.229	5.208	5.353	5.593	5.676
AGT	6.998	7.805	9.545	13.058	10.557	10.04	9.622	9.423	9.47	11.149	6.771	7.372	9.47	13.058	9.954	10.036	9.588	9.53	9.773	11.223
AGTR1	9.328	10.08	10.017	9.401	9.68	9.334	8.606	8.385	8.321	8.262	9.778	9.479	9.969	9.648	9.69	9.054	9.018	8.732	8.793	8.636
AGTRAP	9.482	10.238	10.293	8.879	9.527	9.964	9.687	9.189	9.637	10.094	9.598	9.632	10.047	9.169	9.42	9.604	9.945	9.293	9.907	10.059
AGTRL1	6.273	6.636	6.691	6.101	6.051	6.096	5.866	5.533	5.591	5.877	6.546	6.383	6.457	6.591	5.772	5.539	6.119	5.829	5.813	5.889
AGXT	4.473	5.18	5.32	5.396	5.436	5.496	5.539	5.497	5.051	5.199	4.831	4.788	5.206	5.669	5.332	5.227	5.505	5.45	5.262	5.413
AGXT2	4.329	4.603	4.671	4.39	4.536	4.827	4.608	4.686	4.518	4.667	4.415	4.144	4.44	4.793	4.082	4.548	4.586	4.469	4.533	4.666
AGXT2L1	4.765	5.367	7.515	8.572	12.073	12.201	12.271	11.912	12.381	11.423	4.864	4.686	7.48	9.187	12.132	12.18	12.902	12.416	12.903	12.072
AHCY	12.448	13.217	13.159	13.921	12.412	12.898	12.331	12.553	12.367	13.106	12.731	12.736	12.97	14.122	12.452	12.949	12.506	12.788	12.736	13.283
AHCYL1	12.307	12.438	11.661	11.422	11.05	10.736	11.024	10.556	10.673	11.125	12.153	12.008	11.87	11.664	10.992	10.846	10.628	10.637	10.961	11.491
AHI1	5.805	5.944	5.942	5.086	5.12	5.185	4.916	4.873	5.113	5.45	6.277	5.697	5.577	5.531	4.787	5.013	5.135	5.085	5.019	5.621
AHR	9.396	8.777	8.08	6.395	7.547	7.477	7.542	7.237	7.39	7.272	9.135	8.283	8.163	6.853	7.565	7.299	7.677	7.22	7.642	7.39
AHSA1	13.167	13.592	13.203	13.924	13.882	14.076	14.113	13.63	13.67	14.158	13.333	13.117	13.189	14.747	13.845	14.03	13.889	13.873	13.74	14.235
AICDA	3.981	4.614	4.156	4.611	4.768	4.596	4.834	4.51	4.898	4.754	4.458	4.685	4.921	5.426	4.958	4.914	4.958	4.805	4.735	5.034
AIF1	9.107	9.947	9.441	7.214	9.664	9.846	9.475	9.591	10.088	9.69	8.964	9.638	9.873	8.085	9.891	10.187	9.699	9.935	10.337	10.112
AIM1	8.379	9.961	9.951	7.867	8.822	8.644	8.825	8.35	8.535	8.482	7.974	9.036	9.891	8.084	8.534	8.392	8.859	8.417	9.016	9.068
AIM1L	7.166	8.737	8.738	7.748	9.13	9.188	9.255	8.899	9.256	9.002	7.362	8.169	8.843	8.286	9.161	9.228	9.303	9.245	9.495	9.119
AIM2	7.404	7.924	7.439	6.643	8.135	8.091	7.853	7.253	7.606	7.368	7.319	7.649	7.841	7.145	7.894	7.976	7.654	7.355	7.818	7.509
AIP	4.738	5.073	4.995	4.883	4.563	4.769	4.701	4.711	4.72	4.983	5.065	4.675	4.902	5.057	4.369	4.532	4.678	4.652	4.919	5.045
AIPL1	4.467	4.682	4.926	4.633	4.627	4.652	4.357	4.612	4.587	4.533	4.647	4.384	4.674	4.759	4.186	4.448	4.674	4.499	4.425	4.724
AJ580633	6.027	6.75	7.409	5.5	6.569	6.088	5.877	5.69	6.022	6.198	6.301	6.547	7.261	6.467	6.159	5.649	5.857	5.542	5.932	5.927
AK1	11.844	14.144	15.77	15.795	16.598	16.76	16.333	16.155	15.995	16.038	12.429	14.594	15.414	16.05	16.373	16.387	16.5	16.111	16.074	15.851
AK2	4.684	4.919	4.41	4.459	4.286	4.408	4.767	4.508	4.285	4.666	4.657	4.548	4.203	4.629	4.411	4.626	4.744	4.361	4.542	4.669
AK3	6.729	6.651	6.952	7.254	7.627	8.083	7.683	7.064	7.634	7.994	6.942	6.039	6.493	7.059	7.662	7.62	7.793	7.509	7.922	8.367
AK3L1	8.865	9.848	9.413	10.491	10.697	10.651	10.665	10.624	10.784	11.11	8.997	9.274	9.706	10.868	10.519	10.695	11.011	10.809	11.143	11.401
AK5	5.733	5.121	4.693	4.567	4.39	4.907	4.681	4.686	4.652	4.811	6.047	4.843	4.457	4.873	4.531	4.778	4.941	4.873	5.008	5.106
AK7	6.944	6.387	5.151	4.303	4.644	4.568	4.412	4.696	5.242	4.753	6.506	5.924	5.459	4.881	4.429	5.019	4.679	4.925	4.867	4.949
AKAP10	11.402	11.759	11.511	10.481	10.511	10.431	10.528	10.093	10.289	10.313	11.752	11.42	11.454	10.957	10.535	10.78	10.577	10.747	10.836	10.812
AKAP11	9.267	9.09	8.331	6.48	7.132	6.761	6.972	6.782	6.602	6.709	10.279	8.999	8.371	6.795	6.753	6.571	6.859	6.714	6.826	7.126
AKAP12	13.068	13.109	11.721	9.952	11.218	11.168	11.285	10.393	10.461	10.479	13.041	12.633	12.389	10.443	11.092	11.011	11.336	10.424	10.753	10.892
AKAP13	9.704	8.937	9.158	8.194	7.665	7.54	7.445	7.075	7.42	7.862	9.861	9.084	8.838	8.233	7.532	7.501	7.6	7.34	7.639	8.062
AKAP3	4.358	4.791	4.642	4.199	4.266	4.482	4.706	4.428	4.402	4.528	4.499	4.467	4.316	4.6	4.399	4.256	4.638	5.035	4.525	4.761
AKAP4	6.823	9.088	6.634	5.036	5.202	5.042	4.752	4.696	5.001	5.413	7.038	8.594	7.009	5.544	5.547	5.253	4.823	4.956	5.356	5.538
AKAP6	7.786	8.219	9.602	7.849	9.562	9.885	9.936	9.219	8.903	7.902	8.681	9.2	8.793	7.934	8.764	8.59	9.769	9.339	9.323	8.666
AKAP7	8.635	9	9.226	7.419	9.262	9.409	10.373	9.006	9.354	8.742	8.523	8.638	9.029	8.229	9.197	9.582	10.386	9.029	9.723	8.67
AKAP8	10.447	10.855	10.225	10.455	10.866	10.495	10.731	10.152	10.482	10.598	10.677	10.34	10.402	10.919	10.338	10.252	10.462	10.312	10.532	10.971
AKAP8L	9.497	9.888	10.012	10.194	9.379	9.215	9.312	8.688	8.684	9.633	9.733	9.669	9.546	9.914	8.824	8.58	9.312	8.885	8.93	9.604
AKAP9	9.585	9.592	9.177	8.044	8.201	8.514	8.68	8.277	8.541	8.583	9.588	9.632	9.09	8.339	8.221	8.466	8.521	8.493	8.577	8.548
AKNA	7.375	7.603	6.847	6.051	5.967	6.035	5.849	5.87	6.147	6.134	7.728	7.1	6.77	6.238	6.011	6.03	6.265	6.26	6.312	6.369
AKR1A1	11.885	12.77	12.763	11.344	11.082	11.059	11.014	10.505	11.081	11.082	12.416	12.36	12.698	11.174	11.171	11.144	11.143	10.766	11.426	11.39
AKR1B10	4.975	4.701	4.928	4.212	4.623	5.019	4.881	4.3	5.027	4.604	5.005	4.47	4.308	4.667	4.726	4.845	4.863	4.718	5.221	4.957
AKR1C1	5.694	5.854	6.127	5.446	6.891	6.474	7.037	6.778	6.415	6.466	6.086	6.082	6.503	6.947	6.962	6.76	7.673	7.001	6.895	6.717
AKR1CL1	4.821	4.748	4.415	4.765	4.594	4.459	4.708	4.363	4.487	4.462	4.1	4.45	4.527	4.571	4.543	4.459	5.073	4.437	4.82	4.362
AKR7A2	12.19	12.742	11.741	11.832	11.886	11.68	11.754	11.17	11.608	11.764	12.363	12.158	11.93	12.264	11.69	11.331	11.902	11.316	11.843	11.862
AKT1	13.312	13.777	13.261	12.087	12.505	12.737	12.675	12.197	12.225	12.526	13.533	13.419	13.191	12.937	12.54	12.655	12.84	12.442	12.548	12.567
AKT1S1	11.793	12.639	12.732	13.371	13.407	13.664	13.412	13.137	13.266	13.44	12.137	12.337	12.73	14.157	13.161	13.184	13.606	13.223	13.394	13.414
AKT2	5.968	6.31	6.673	6.894	6.817	7.363	6.307	6.286	6.481	6.929	6.016	6.342	6.361	6.986	6.456	6.834	6.631	6.325	6.763	6.833
AKT3	8.798	8.589	8.359	7.241	6.937	6.806	6.936	6.591	6.594	6.715	8.519	7.952	7.808	7.128	6.655	6.417	6.73	6.116	6.265	6.733
ALAD	11.904	13.482	12.581	11.557	12.366	12.567	12.845	12.469	12.213	12.928	12.366	12.484	12.739	12.895	12.296	12.671	13.039	12.864	12.895	13.372
ALAS2	9.492	9.749	9.484	5.192	5.468	4.878	4.48	4.885	6.132	5.006	9.891	8.772	9.561	4.923	6.049	4.365	4.512	5.336	5.826	4.859
ALB	6.096	5.867	5.539	4.59	4.617	4.833	4.795	4.511	4.686	4.563	6.023	5.75	5.23	4.964	4.508	4.801	4.741	4.766	4.572	4.783
ALCAM	7.909	7.356	6.595	5.874	6.423	6.555	6.384	6.372	6.597	7.053	7.335	6.602	6.248	6.369	6.082	6.135	6.289	6.736	6.567	7.035
ALDH18A1	11.895	11.686	10.546	10.004	9.86	10.056	9.893	9.915	9.904	10.1	11.855	11.303	11.071	10.805	10.03	10.145	10.012	9.974	10.193	10.485
ALDH1A1	9.021	9.399	8.694	8.418	9.718	10.006	9.724	9.854	10.293	10.465	8.563	8.73	8.992	8.89	9.791	10.034	9.97	10.085	10.577	10.81
ALDH1A2	9.166	9.301	8.537	7.887	8.175	7.417	6.503	7.021	6.952	7.284	8.57	8.487	8.398	7.764	7.791	7.053	7.244	7.301	7.177	6.913
ALDH1A3	8.04	8.623	7.243	6.174	6.526	6.5	6.688	6.31	6.579	6.699	8.695	8.151	7.758	6.458	6.67	6.809	6.451	6.43	6.919	6.952
ALDH1B1	4.414	4.791	5.078	4.576	4.685	4.868	4.754	4.614	4.561	4.985	4.773	4.321	4.638	4.972	4.341	4.511	4.789	4.509	4.545	5.091
ALDH3A1	6.118	6.036	5.986	5.724	5.594	5.299	5.192	5.073	5.573	5.39	6.436	5.921	5.775	5.894	5.039	5.026	5.381	5.039	5.692	5.478
ALDH3A2	7.208	7.295	7.525	6.532	6.957	7.216	6.758	6.472	6.871	7.035	7.246	7.069	7.555	6.978	6.861	6.931	6.98	6.724	7.204	7.279
ALDH3B2	9.487	9.703	9.651	8.718	9.189	9.288	9.118	8.954	9.033	9.156	9.588	9.528	9.551	9.165	9.236	8.989	9.355	9.115	9.268	9.195
ALDH5A1	10.632	11.068	10.547	9.161	10.479	10.876	11.062	10.575	10.868	10.707	10.622	10.879	10.344	9.952	10.51	10.804	11.21	10.709	10.963	11.019
ALDH6A1	5.653	6.295	6.347	5.826	6.275	6.789	6.536	6.327	6.925	6.602	6.198	5.88	6.25	6.1	6.276	6.371	6.535	6.471	6.924	6.844
ALDH7A1	9.056	8.979	8.496	7.489	8.316	9.025	8.655	8.461	8.502	8.406	9.437	8.725	8.683	8.293	8.48	8.74	9.028	8.616	8.833	8.658
ALDH8A1	5.526	4.345	4.785	4.494	4.791	4.925	4.568	4.386	4.414	4.5	4.916	4.574	4.432	4.715	4.519	4.397	4.678	4.475	4.457	4.645
ALDH9A1	13.609	13.876	13.623	11.693	11.448	11.593	11.77	11.063	11.199	11.535	13.804	13.589	13.271	12.05	11.191	11.385	11.619	10.968	11.44	11.54
ALDOA	14.982	16.893	17.824	17.556	17.761	18.028	17.68	17.663	17.49	17.58	15.554	16.841	17.366	17.936	17.373	17.535	17.809	17.734	17.737	17.54
ALDOB	7.859	6.967	6.923	6.882	7.684	7.75	7.068	7.263	7.351	7.5	7.199	6.615	6.882	7.239	7.294	7.63	7.398	7.716	7.62	7.586
ALDOC	11.988	10.565	8.824	7.786	8.136	8.481	8.387	7.833	8.962	8.107	10.589	9.676	8.971	7.925	8.216	8.169	8.368	7.829	9.694	8.294
ALG10	6.657	6.613	6.432	5.405	6.547	6.971	6.678	6.155	6.811	6.985	6.895	6.442	6.213	6.104	6.601	6.747	6.787	6.342	6.92	6.857
ALG2	8.056	8.132	7.688	6.537	6.804	7.121	6.767	6.466	7.059	7.219	8.258	7.974	7.756	7.151	6.668	7.009	6.792	6.792	7.432	7.384
ALG6	8.808	9.07	8.348	6.795	7.416	7.6	7.818	7.325	7.492	7.685	8.797	9.35	8.26	7.436	7.347	7.427	7.52	7.263	7.549	7.671
ALG8	10.56	9.982	9.26	6.101	7.789	7.909	8.024	7.418	7.712	7.801	10.464	9.611	9.081	7.198	7.565	7.555	7.906	7.465	7.981	7.63
ALG9	9.603	9.682	9.129	6.052	7.221	7.583	7.332	7.148	7.26	7.522	9.403	9.302	8.979	7.148	7.222	7.505	7.476	7.355	7.649	7.767
ALK	4.412	4.482	4.816	5.345	5.547	5.617	5.622	5.054	4.966	5.222	4.562	4.388	4.558	5.388	5.523	5.287	5.359	5.346	4.969	5.384
ALKBH	10.854	10.819	10.467	10.874	10.834	10.807	11.062	10.31	10.182	10.436	10.547	10.405	10.547	10.598	10.341	10.372	10.872	10.333	10.311	10.533
ALKBH3	7.92	8.148	8.647	9.222	9.547	9.678	9.746	9.107	9.443	9.422	8.033	8.114	8.626	9.635	9.408	9.214	9.549	9.065	9.523	9.409
ALMS1	10.56	10.154	9.502	7.871	7.878	7.842	7.864	7.752	7.486	8.331	10.455	9.939	9.659	8.256	7.666	7.77	7.934	7.78	7.727	8.47
ALOX12B	7.006	7.116	7.252	7.215	7.765	7.797	7.409	7.135	7.284	7.506	7.28	7.027	7.32	7.379	7.5	7.393	7.572	7.287	7.402	7.387
ALOX5	6.168	6.277	5.776	5.097	5.325	5.367	5.4	5.208	5.828	5.504	6.282	6.158	6.191	5.282	5.237	5.309	5.471	5.446	5.986	5.825
ALOX5AP	4.695	5.033	5.03	4.363	4.549	4.499	4.494	4.248	4.749	4.595	4.951	4.572	4.318	4.905	4.35	4.483	4.674	4.75	4.573	4.544
ALPI	6.094	5.676	6.157	5.829	6.322	6.117	6.301	6.181	5.814	5.949	5.693	5.952	5.876	6.153	6.485	6.458	6.403	6.228	6.238	5.955
ALPL	6.596	6.38	6.304	7.169	6.839	7.281	5.529	5.56	6.089	7.06	6.548	6.226	6.44	6.723	6.736	6.511	5.887	5.884	6.241	6.897
ALS2	11.286	10.863	10.676	9.801	10.912	11.147	11.501	10.813	10.879	11.116	11.251	10.717	10.558	10.41	10.81	11.153	11.41	10.901	11.026	11.272
ALS2CL	10.617	11.885	12.788	12.867	12.025	11.609	12.506	11.594	11.863	12.644	10.971	11.259	12.557	13.057	11.638	11.238	12.076	11.542	11.958	12.592
ALS2CR13	9.633	8.519	7.614	8.006	6.42	6.051	6.383	5.708	5.987	6.161	8.962	7.984	7.801	7.02	6.192	6.062	6.186	6.03	6.276	6.466
ALS2CR19	11.398	11.019	10.556	8.171	8.712	9.129	8.885	8.322	8.317	8.67	11.266	10.922	10.299	8.981	8.783	9.129	9.425	8.558	8.7	8.92
ALS2CR2	6.428	6.258	6.391	8.144	8.742	9.025	8.707	8.45	8.692	9.553	6.793	6.129	6.152	8.379	8.651	8.569	8.742	8.66	8.833	9.563
ALS2CR4	7.941	7.987	6.844	5.635	6.84	6.706	6.77	6.312	6.445	6.242	7.814	7.43	7.267	6.652	6.632	6.504	6.99	6.798	6.464	6.295
ALS2CR7	4.868	5.113	4.517	4.413	4.643	4.846	4.55	4.763	4.579	4.401	5.372	4.422	4.345	4.492	4.422	4.343	4.606	4.506	4.582	4.513
ALS2CR8	4.796	4.519	4.889	4.215	4.471	4.572	4.294	4.548	4.431	4.401	4.963	4.622	4.568	4.452	4.677	4.647	4.606	4.874	4.428	4.575
ALX3	5.056	4.981	5	4.659	4.75	4.578	4.818	4.734	4.522	4.759	5.085	4.788	4.773	4.748	4.252	4.259	5.027	4.917	4.612	4.674
ALX4	4.515	4.575	4.641	4.904	4.927	5.018	4.81	4.544	4.888	4.975	4.77	4.241	4.35	4.995	4.81	4.87	4.979	4.992	4.925	5.083
AMACR	8.421	8.943	8.776	8.968	9.872	10.183	10.435	10.132	10.734	10.773	8.432	8.496	8.972	9.969	10.197	10.188	10.386	10.783	11.102	11.17
AMBP	4.553	4.717	4.605	4.452	4.632	4.519	4.719	4.595	4.92	5.152	5.2	5.028	4.488	4.884	4.445	4.52	4.721	5.016	5.124	5.61
AMD1	8.818	8.371	8.344	8.732	9.057	8.677	8.455	8.237	7.888	8.273	8.724	8.339	8.285	8.966	9.244	8.488	8.4	8.652	8.176	8.27
AMFR	8.656	9.035	8.873	8.878	9.738	10.217	9.816	9.854	9.942	10.3	8.738	8.839	8.886	9.195	9.577	9.957	10.205	10.059	10.187	10.42
AMH	9.709	9.802	9.825	9.406	9.307	9.39	9.032	8.61	8.904	9.114	9.805	9.567	9.54	9.628	9.004	8.914	9.195	8.881	9.112	9.034
AMID	7.387	9.596	9.144	7.123	8.841	8.988	9.263	8.707	9.136	9.476	7.192	8.946	8.763	7.482	8.465	8.797	9.441	9.138	9.526	9.586
AMOTL1	11.22	11.966	12.138	12.559	12.25	12.223	12.423	11.711	11.757	12.024	11.504	11.825	12.106	12.906	12.124	12.318	12.061	11.643	11.741	12.036
AMOTL2	11.15	11.022	11.268	9.373	9.345	9.32	8.975	8.434	8.821	9.358	11.343	10.887	10.516	9.578	9.453	9.735	9.503	8.85	9.357	9.527
AMPD1	12.502	11.968	15.164	13.331	15.531	15.757	16.042	15.433	15.157	14.779	13.158	14.107	14.855	13.29	15.141	15.221	15.693	14.939	15.121	14.259
AMPD3	6.755	6.377	5.849	11.995	9.112	8.779	9.971	9.247	9.595	10.956	6.632	5.691	6.002	12.208	9.297	8.752	9.351	9.841	9.615	11.565
AMPH	11.231	9.316	7.786	5.736	6.796	7.369	6.775	7.227	6.824	7.121	11.174	9.811	7.945	6.588	6.603	7.234	6.999	6.792	7.084	6.851
AMT	12.173	12.774	12.294	9.729	10.86	10.914	11.258	10.61	10.766	10.794	12.381	12.448	12.413	10.319	10.76	10.608	11.486	10.717	11.029	10.877
AMY2A	9.856	9.369	8.649	11.048	12.232	12.466	12.85	12.273	12.228	12.81	9.857	9.138	8.289	11.411	11.749	12.214	12.741	12.336	12.273	12.953
AMZ2	12.243	12.637	12.365	12.055	12.85	13.314	13.199	12.916	12.897	13.277	12.421	12.353	12.378	12.724	12.749	13.104	13.169	13.024	13.146	13.281
ANAPC1	7.549	7.422	7.12	6.675	7.058	6.694	7.297	6.87	6.508	6.594	7.822	7.068	7.053	7.232	6.744	6.405	7.16	7.283	6.881	6.776
ANAPC10	8.692	8.993	9.057	8.436	9.363	9.416	9.693	9.112	9.048	9.067	8.805	8.94	8.872	8.94	9.116	9.192	9.565	9.177	9.309	9.051
ANAPC13	11.065	10.935	10.795	9.213	10.463	10.695	10.832	10.493	10.566	10.845	11.063	10.704	10.494	9.865	10.31	10.449	10.796	10.551	10.778	10.749
ANAPC4	12.414	12.36	12.105	10.603	10.866	10.842	10.965	10.764	10.867	11.242	12.414	12.168	12.054	11.575	10.788	10.943	10.988	10.999	11.036	11.308
ANAPC5	12.138	12.215	12.179	10.549	11.115	11.421	11.358	10.82	10.92	11.085	12.245	11.916	11.909	11.379	11.042	11.212	11.245	10.885	11.139	11.022
ANAPC7	12.616	12.735	12.144	11.179	11.683	11.834	11.866	11.762	11.373	12.258	12.657	12.45	12.325	12.053	11.551	11.524	12.171	12.087	12.004	12.51
ANG	8.233	9.709	8.761	7.067	8.774	8.332	7.965	7.778	8.147	8.921	9.364	9.335	8.781	8.099	8.189	7.91	8.071	7.662	8.349	8.436
ANGPT1	9.492	10.042	9.239	7.884	8.539	9.634	8.91	8.595	8.946	8.947	10.482	9.668	9.852	8.125	8.955	9.208	9.855	8.823	8.783	8.67
ANGPT2	7.772	8.068	7.844	6.91	7.156	7.306	6.98	6.908	7.015	7.263	7.612	7.882	7.819	6.951	7.054	7.054	7.422	7.134	7.291	7.36
ANGPTL1	10.493	10.38	9.483	6.725	7.983	7.971	7.409	7.587	7.293	7.737	10.754	10.734	10.39	7.992	8.063	8.163	7.891	7.563	8.048	8.124
ANGPTL2	11.021	11.88	11.046	6.276	9.338	9.841	9.224	9.059	9.444	9.532	11.247	11.917	11.268	8.65	9.314	9.588	9.293	8.851	9.689	9.569
ANGPTL4	10.507	10.481	7.152	11.572	13.899	11.26	12.421	12.039	10.367	13.574	10.411	8.648	7.309	12.416	12.069	10.767	11.813	12.558	11.112	13.683
ANK1	8.141	8.608	9.109	9.049	10.113	10.532	10.025	9.871	10.034	10.339	8.431	9.039	9.009	9.129	9.796	9.946	9.654	9.805	9.995	9.935
ANK2	8.609	8.575	8.447	6.46	7.475	7.637	7.308	7.119	7.508	7.388	8.983	8.848	8.294	6.871	7.441	7.5	7.647	7.505	7.845	7.677
ANK3	7.916	7.761	8.406	7.014	7.486	7.916	7.643	7.67	7.287	7.487	8.078	8.033	7.944	7.092	7.349	7.859	7.808	7.217	7.27	7.268
ANKFY1	8.541	8.713	8.291	7.052	7.498	7.482	7.589	7.116	7.421	7.425	8.596	8.316	8.522	7.616	7.443	7.437	7.801	7.412	7.675	7.65
ANKH	6.674	7.094	6.687	6.051	6.895	6.968	6.825	6.934	6.903	6.858	7.016	6.771	6.561	6.387	6.831	6.639	6.886	6.841	6.916	6.844
ANKHD1	9.16	9.121	9.13	8.609	9.399	9.699	9.424	8.842	8.95	9.207	9.187	8.83	9.025	9.087	9.22	9.292	9.351	8.999	9.266	9.222
ANKIB1	5.997	5.6	5.822	6.244	6.331	6.378	6.041	6.096	6.039	6.037	6.168	5.681	5.59	6.706	6.207	6.178	6.275	6.29	6.174	6.184
ANKK1	5.39	5.745	5.887	5.817	5.256	5.27	5.324	5.197	5.958	5.567	5.738	5.465	5.519	5.962	4.821	5.212	5.56	5.44	6.068	5.591
ANKMY2	8.086	8.414	8.418	8.7	8.545	8.795	8.875	8.317	8.384	8.514	8.419	8.386	8.512	8.537	8.062	8.261	8.518	8.217	8.376	8.555
ANKRA2	9.414	9.712	9.706	9.12	9.893	10.055	10.545	9.917	9.761	9.92	9.305	9.52	9.632	9.444	9.472	9.631	10.345	9.572	9.873	9.768
ANKRD1	11.874	9.336	13.454	16.12	15.845	15.936	16.267	15.492	15.988	15.667	12.459	11.465	11.499	16.37	16.9	16.766	15.681	16.576	16.781	16.868
ANKRD10	11.735	12.093	12.292	12.382	12.57	12.535	12.503	12.206	12.143	12.233	11.89	12.081	12.368	13.372	12.548	12.247	12.209	12.471	12.269	12.351
ANKRD11	12.266	12.341	11.738	11.747	11.691	11.617	11.586	11.006	10.986	11.593	12.433	11.889	11.662	11.769	11.314	11.311	11.649	11.146	11.233	11.709
ANKRD12	10.657	10.775	10.708	10.148	10.222	10.282	10.241	9.763	9.704	9.835	10.699	10.586	10.513	10.358	9.887	9.851	10.257	9.895	9.893	9.817
ANKRD13	8.875	8.601	8.435	7.595	7.637	7.5	7.035	6.797	7.084	7.366	9.192	8.548	8.314	7.485	7.452	7.268	7.228	6.896	7.298	7.363
ANKRD16	10.557	10.89	10.459	9.488	10.687	10.898	10.756	10.351	10.647	10.981	11.136	10.77	10.472	10.385	10.696	10.696	11.029	10.781	11.152	11.129
ANKRD17	9.752	9.702	9.546	9.474	9.428	9.384	9.418	8.847	8.99	9.04	9.691	9.504	9.471	9.512	9.12	9.063	9.353	9.105	9.259	9.188
ANKRD23	4.251	4.687	7.331	9.513	11.179	11.419	11.033	10.828	10.835	10.891	4.208	4.622	7.371	9.664	11.271	10.962	10.882	10.98	11.126	10.787
ANKRD25	10.992	12.365	12.364	10.603	10.8	11.015	10.951	10.279	10.619	10.643	11.837	12.396	12.718	11.06	10.645	10.781	10.91	10.33	10.91	10.73
ANKRD28	6.626	6.529	6.742	6.069	7.333	7.701	7.005	6.852	6.893	7.391	6.876	6.553	6.519	6.424	6.921	7.348	7.176	6.718	6.92	7.32
ANKRD32	10.901	10.349	9.792	7.988	8.16	8.131	9.04	7.963	8.265	8.197	11.395	10.235	9.492	8.183	7.928	8.138	8.305	7.844	8.271	8.401
ANKRD46	10.453	10.088	9.991	9.805	10.074	10.261	10.103	9.821	9.896	10.236	10.175	9.996	10.032	10.26	9.972	10.164	10.257	10.149	10.223	10.196
ANKRD6	7.457	7.303	8.575	6.509	7.517	8.317	7.798	7.735	7.822	7.959	7.257	7.676	8.156	7.874	7.792	7.918	8.138	7.872	8.055	7.906
ANKRD9	11.844	12.211	12.176	12.218	12.457	12.588	12.3	12.212	12.284	12.46	12.063	12.097	12.104	12.386	12.214	12.286	12.552	12.328	12.571	12.342
ANKS1	12.641	13.419	12.336	11.204	11.332	10.803	10.955	10.595	10.33	10.832	12.975	13.364	12.373	11.195	11.154	10.614	11.061	10.541	10.561	11.107
ANKZF1	11.056	11.659	11.381	11.208	10.641	10.299	10.666	10.063	10.203	10.85	11.22	11.31	11.386	11.493	10.299	10.264	10.341	10.115	10.319	10.931
ANLN	9.589	8.983	7.899	4.74	6.459	5.795	6.129	5.904	6.974	5.679	9.793	8.574	7.958	5.14	5.991	5.309	5.698	5.689	6.683	5.776
ANP32B	11.226	11.283	10.342	9.592	9.234	9.583	9.358	9.168	9.05	9.684	11.415	10.955	10.294	10.511	9.237	9.737	9.436	9.426	9.274	9.964
ANP32D	13.471	13.35	12.755	11.43	11.094	11.56	11.371	11.074	10.89	11.503	13.524	13.123	12.815	11.786	11.068	11.581	11.564	11.303	11.363	11.655
ANP32E	9.524	9.367	9.284	8.771	8.583	8.863	8.958	8.709	8.68	8.996	9.183	8.986	9.19	9.497	8.637	8.838	8.927	8.811	8.748	9.33
ANPEP	9.189	10.217	7.962	6.635	6.966	7.228	6.587	7.108	7.457	7.387	9.168	9.348	8.029	7.173	6.836	7.308	6.775	7.755	8.13	7.747
ANTXR1	10.225	9.923	9.369	6.796	7.829	7.938	7.62	7.466	7.476	7.88	10.205	9.927	9.552	7.4	7.504	8.092	7.653	7.355	7.749	7.503
ANTXR2	11.921	12.467	11.475	9.504	10.305	10.502	10.102	10.136	10.161	10.54	12.233	12.208	11.785	10.146	10.196	10.433	10.489	10.269	10.743	10.767
ANUBL1	5.262	5.34	4.923	4.571	5.218	5.062	4.834	4.584	4.965	4.953	5.243	5.14	4.686	4.924	5.263	4.924	5.19	4.856	5.215	5.22
ANXA11	11.449	11.528	10.399	9.585	10.122	10.346	9.553	9.53	9.975	10.257	11.796	10.985	10.5	10.169	10.004	10.023	9.757	9.67	10.27	10.246
ANXA13	5.792	5.637	5.777	4.572	4.915	4.757	4.624	4.407	4.882	5.225	6.617	5.452	5.729	5.048	4.499	4.536	4.715	4.78	4.931	4.913
ANXA2	14.292	14.856	14.339	12.43	13.284	12.938	12.057	12.496	12.985	13.375	14.082	14.431	14.448	12.983	13.352	12.704	12.756	12.727	13.486	13.74
ANXA3	11.276	12.184	12.486	11.123	11.778	12.167	12.264	11.983	11.899	12.041	11.07	11.821	12.406	11.345	12.06	12.151	12.21	12.274	12.325	12.044
ANXA4	11.563	11.865	11.045	10.023	10.901	10.736	11.006	10.41	10.695	10.848	11.719	11.872	11.34	10.419	10.751	10.474	11.085	10.243	10.869	10.77
ANXA5	5.98	6.399	6.527	8.391	7.762	7.832	8.454	7.584	7.693	8.776	5.63	6.355	6.343	8.192	7.349	7.626	7.984	7.946	7.898	8.665
ANXA6	10.043	10.006	10.197	9.06	9.831	10.211	9.353	9.386	9.601	9.586	10.305	10.133	10.025	9.233	9.761	9.962	9.754	9.513	9.962	9.731
ANXA7	9.406	9.739	9.844	10.075	10.683	10.997	11.338	11.039	10.928	10.875	9.515	9.636	9.932	10.539	10.549	10.89	11.103	11.097	11.108	11.043
ANXA8	9.613	10.137	11.626	10.868	9.888	9.776	10.006	9.744	10.203	10.774	8.353	9.78	11.383	11.507	9.401	9.174	9.851	9.227	10.241	10.628
ANXA9	5.136	4.551	4.605	6.73	5.513	5.723	5.485	5.698	6.066	7.461	5	4.297	4.556	6.992	5.295	5.845	5.447	6.308	6.32	7.246
AOAH	5.838	6.426	6.379	5.205	5.642	5.869	5.865	5.465	6.034	5.499	6.353	6.076	6.444	5.475	5.494	5.67	5.838	5.593	6.005	5.686
AOC2	9.192	8.869	8.979	8.147	8.517	8.721	8.009	7.926	7.864	8.292	8.829	8.206	8.697	8.992	8.667	8.509	8.373	8.092	8.392	8.349
AOC3	9.373	11.216	12.085	8.622	9.798	10.032	9.8	9.539	9.835	9.915	9.785	11.143	11.717	9.08	9.824	9.675	10.008	9.621	10.18	9.802
AOF1	6.325	6.856	6.571	6.91	7.323	7.548	7.251	6.948	7.142	7.51	6.524	7.008	6.716	7.333	7.17	7.409	7.482	7.207	7.283	7.406
AOX1	6.286	6.987	7.361	8.404	8.33	8.221	7.996	7.776	7.887	8.316	7.491	7.436	7.674	8.353	7.867	7.746	7.803	7.941	8.1	8.328
AOX2	4.67	4.893	4.525	4.525	4.798	4.474	4.819	4.684	5.001	5.037	4.787	4.343	4.388	4.452	4.633	4.772	4.75	4.545	5.08	5.058
AP1B1	8.506	8.881	8.767	8.694	8.976	9.337	9.046	8.696	8.967	9.133	8.676	8.637	8.764	9.061	9.107	9.157	9.129	8.86	9.14	9.318
AP1G1	11.742	11.822	11.33	10.196	10.83	11.224	11.077	10.892	10.78	11.143	11.706	11.471	11.493	10.944	10.527	11.006	11.216	10.896	11.03	11.213
AP1G2	6.218	6.082	5.827	5.607	5.571	5.596	5.214	5.139	5.382	5.579	6.258	5.903	5.698	5.816	5.365	5.214	5.474	5.192	5.574	5.6
AP1GBP1	6.996	7.531	7.311	7.035	7.237	7.142	7.027	6.783	6.799	6.852	7.52	7.13	7.125	7.318	6.877	7.145	7.278	6.973	7.006	7.036
AP1M1	13.277	13.554	13.08	12.041	12.473	12.643	12.433	11.974	12.186	12.666	13.39	13.083	12.89	12.711	12.219	12.452	12.416	12.148	12.479	12.595
AP1S1	11.367	11.366	10.484	9.21	9.157	9.273	9.239	9.161	9.313	9.66	11.35	10.825	10.514	9.798	9.117	9.193	9.38	9.273	9.61	9.765
AP1S2	11.438	11.382	10.004	8.508	8.942	8.59	8.715	8.312	8.528	8.866	11.19	11.344	10.075	8.872	8.915	8.582	8.846	8.453	8.786	9.012
AP1S3	9.884	9.53	11.111	11.514	11.664	11.628	11.518	11.097	11.19	10.961	9.888	9.862	10.912	11.534	11.603	11.326	11.678	11.173	11.371	10.946
AP2A2	14.338	14.578	14.317	13.808	13.782	13.957	13.992	13.566	13.553	13.934	14.592	14.104	14.114	14.267	13.686	13.784	13.943	13.727	13.783	14.023
AP2S1	10.767	11.251	11.01	10.746	11.456	11.859	11.352	10.913	11.164	11.719	10.956	10.837	10.63	11.128	11.351	11.363	11.522	11.072	11.52	11.583
AP3B1	11.806	11.726	11.075	10.291	10.763	11.058	10.664	10.543	10.622	10.921	12.005	11.485	11.133	10.723	10.743	10.897	10.794	10.662	10.806	11.038
AP3B2	10.809	7.917	6.463	5.804	5.896	5.878	5.934	5.722	5.822	5.967	8.322	6.773	6.149	6.214	5.68	5.502	5.989	5.925	5.876	5.998
AP3D1	10.89	11.296	10.767	9.811	9.583	9.728	10.132	9.477	9.866	10.146	11.056	11.074	10.613	9.976	9.412	9.615	10.144	9.58	10.015	10.229
AP3S1	12.758	12.052	10.053	5.366	6.656	7.041	6.599	6.467	6.627	6.765	12.972	11.339	10.381	6.065	7.255	7.343	7.05	6.542	7.261	7.248
AP4B1	8.32	8.416	7.918	6.138	7.025	6.943	6.967	6.883	7.162	7.398	8.162	7.974	8.078	7.368	6.997	7.119	7.183	7.121	7.5	7.714
AP4E1	8.299	8.575	8.401	8.758	8.692	8.939	8.693	8.508	8.64	9.126	8.513	8.402	8.362	9.102	8.468	8.794	8.723	8.686	8.87	9.294
APAF1	5.851	5.124	5.117	4.783	5.024	4.747	4.664	4.731	4.738	4.847	6.26	5.433	5.067	5.193	4.949	4.769	4.805	5.14	4.846	4.762
APBA2BP	8.884	8.35	8.022	5.37	6.326	6.852	7.127	6.242	6.487	7.26	9.044	8.086	7.784	6.35	6.263	6.483	7.32	6.405	6.772	7.063
APBA3	10.632	11.047	11.297	11.647	11.423	11.507	11.18	10.972	11.014	11.326	10.699	10.803	11.084	11.652	11.425	11.283	11.369	11.154	11.339	11.381
APBB1	13.204	13.232	12.865	10.528	11.385	11.401	11.426	10.994	11.079	11.001	12.952	12.857	12.696	11.127	11.092	10.991	11.386	10.978	11.163	10.952
APBB1IP	9.047	9.756	8.891	7.126	8.093	8.092	8.069	7.873	8.122	8.321	9.23	9.196	8.735	7.484	7.863	7.999	8.002	7.946	8.172	8.489
APBB2	6.629	6.184	6.39	5.127	5.157	5.253	4.775	5.008	5.292	5.272	6.448	5.944	5.756	5.078	4.88	5.096	5.12	4.856	5.324	5.325
APBB3	4.91	5.091	5.276	4.995	4.707	4.803	4.68	4.407	5.136	5.15	5.324	4.859	4.985	5.196	4.617	4.66	4.885	4.843	5.279	5.261
APC	7.075	7.068	7.018	5.563	6.63	6.748	6.788	6.33	6.621	6.815	6.967	6.941	7.145	6.694	6.394	6.72	7.004	6.596	6.702	6.898
APC2	10.416	9.544	9.205	7.929	9.326	9.308	9.216	8.642	8.889	9.032	9.509	8.996	9.137	8.816	8.985	8.858	9.432	8.814	9.141	9.008
APCDD1	13.832	11.056	10.855	11.445	10.915	10.788	11.723	10.614	10.415	10.439	13.216	9.757	10.535	11.042	10.87	10.868	11.76	10.871	10.654	10.872
APEX1	12.603	12.855	11.949	11.92	11.743	11.872	11.815	11.509	11.64	12.077	12.983	12.338	12.024	12.698	11.494	11.696	11.79	11.552	11.831	12.23
APEX2	10.441	10.649	9.773	7.972	8.623	8.764	8.526	8.275	8.876	9.039	10.681	10.065	9.858	8.864	8.464	8.697	8.774	8.371	9.22	9.03
API5	10.672	10.696	10.517	10.411	11.008	11.303	11.21	10.784	10.635	10.982	10.578	10.656	10.485	10.93	10.879	11.113	11.204	10.755	10.943	11.08
APITD1	9.503	9.52	8.794	7.352	8.513	8.505	8.338	8.081	8.436	8.643	9.567	9.179	8.827	8.227	8.361	8.266	8.461	8.247	8.667	8.705
APLN	8.693	9.077	9.009	7.462	7.757	7.976	7.77	7.834	8.272	7.862	8.823	8.903	8.975	6.911	7.797	7.808	8.071	8.076	8.445	7.864
APLP1	11.032	9.762	9.655	7.982	9.449	10.326	9.733	9.476	9.477	9.973	9.718	9.191	9.341	8.377	9.344	9.76	10.011	9.638	9.869	9.853
APOA1	13.597	13.951	13.301	9.398	8.941	8.999	8.684	8.576	8.978	9.148	13.613	13.311	13.194	10.161	9.423	9.136	9.04	9.153	9.827	9.774
APOA1BP	9.859	10.684	9.735	9.449	10.047	10.514	10.367	10.011	10.271	10.41	10.354	9.926	10.374	10.36	10.245	10.295	10.362	10.146	10.53	10.413
APOA4	5.246	5.656	6.86	4.918	5.759	5.897	5.707	5.215	6.211	5.692	5.668	5.02	6.716	5.512	5.796	5.745	6.298	5.524	6.529	5.718
APOBEC1	4.575	4.834	4.519	4.393	4.633	4.699	4.581	4.848	4.769	4.399	4.495	4.338	4.346	4.57	4.444	4.639	4.998	5	4.398	4.488
APOBEC2	4.524	4.582	4.764	4.401	4.504	4.702	4.578	4.737	4.674	4.593	4.299	4.512	4.988	4.48	4.623	4.739	4.469	4.856	4.734	4.608
APOC3	7.39	7.959	8.015	6.803	7.171	7.208	6.841	6.547	6.806	6.96	7.788	7.412	7.763	7.112	6.983	6.822	7.033	6.658	7.09	6.912
APOD	9.041	8.962	9.081	9.128	9.465	10.068	10.238	9.988	9.832	10.171	8.694	8.262	9.203	9.609	9.67	10.344	10.672	10.137	10.467	10.659
APOE	13.199	14.356	12.077	9.97	11.308	11.852	11.279	11.622	12.088	12.543	14.056	13.645	12.161	10.721	11.063	11.55	11.08	11.649	12.723	12.614
APP	13.82	13.733	13.505	11.123	11.353	11.14	10.987	10.9	10.919	11.183	13.81	13.784	13.711	11.355	11.276	11.096	11.217	10.97	11.334	11.321
APPBP1	9.565	8.956	8.461	9.217	9.331	9.615	9.614	9.299	9.493	9.613	9.573	8.882	8.659	9.925	9.267	9.497	9.372	9.43	9.723	9.886
APPBP2	11.104	10.948	10.307	8.409	8.911	9.384	9.087	8.778	8.783	9.223	11.185	10.587	10.255	9.07	8.848	9.327	9.15	8.911	9.098	9.28
APRIN	10.186	9.969	9.511	7.83	7.709	8.062	7.936	7.366	7.354	7.745	10.012	9.733	9.338	8.206	7.528	7.837	7.905	7.607	7.644	7.563
APRT	13.288	13.909	13.08	13.047	12.822	13.055	12.595	12.486	12.751	13.121	13.495	13.255	13.161	13.865	12.747	12.879	12.543	12.668	12.893	13.054
APTX	7.763	7.804	7.503	7.187	7.426	7.179	7.575	6.982	7.322	7.467	7.694	7.389	7.818	7.342	7.362	7.675	7.144	7.359	7.562	7.942
APXL	8.413	7.413	7.054	6.802	6.826	6.674	6.196	6.206	6.165	6.629	8.138	7.062	6.897	6.87	6.719	6.292	6.294	6.404	6.222	6.672
AQP1	12.608	13.289	12.759	13.191	13.17	13.016	11.928	12.226	11.964	12.598	13.311	13.12	12.578	13.16	12.907	12.871	12.169	12.707	12.323	12.778
AQP11	8.979	8.713	9.358	10.161	9.747	9.875	9.936	8.274	8.487	8.526	9.015	8.363	9.602	8.462	9.137	9.76	9.558	8.92	8.693	9.364
AQP2	7.898	7.907	8.194	7.955	7.484	7.388	7.077	6.979	6.989	7.431	8.094	7.914	7.992	7.975	7.352	7.154	7.293	7.239	7.241	7.397
AQP3	8.173	8.19	7.029	6.858	7.98	8.316	8.391	7.9	8.588	8.896	8.257	6.9	7.154	8.618	7.742	8	8.142	8.247	8.533	9.138
AQP4	9.644	9.732	11.137	9.257	10.206	10.872	10.835	10.387	10.035	9.924	10.096	10.882	11.027	9.305	10.892	10.558	11.034	10.999	10.612	10.001
AQP5	6.264	6.366	6.26	5.637	5.629	5.554	5.704	5.217	5.719	5.792	6.436	6.27	6.283	6.242	5.347	5.309	5.605	5.396	5.768	5.786
AQP8	8.714	8.602	8.535	8.101	7.722	7.579	7.619	7.287	7.227	7.475	8.612	8.255	8.425	8.612	7.505	7.249	7.647	7.535	7.52	7.472
AQR	10.763	11.333	10.824	10.742	11.203	11.224	10.938	10.601	10.963	11.113	10.945	10.592	10.819	11.236	11.033	10.887	11.143	10.91	11.389	11.257
AR	5.375	5.311	4.75	4.811	4.759	5.662	4.908	5.122	5.417	5.704	5.107	4.865	4.749	5.249	4.547	5.317	5.395	5.08	5.581	5.73
ARAF	11.122	12.227	13.096	13.682	13.143	13.511	12.973	12.923	12.891	13.402	11.737	12.28	12.729	13.834	12.954	13.161	13.11	12.952	13.091	13.301
ARC	8.009	7.896	7.524	6.92	6.966	7.186	6.679	6.549	6.731	6.887	8.188	7.732	7.64	7.111	6.598	6.795	6.951	6.719	7.125	6.88
ARCN1	10.533	10.438	9.714	9.202	9.279	9.471	9.405	9.1	8.985	9.289	10.502	10.187	9.949	9.803	8.944	9.308	9.394	9.01	9.031	9.293
ARF1	10.839	10.633	10.522	10.617	10.547	10.907	10.315	10.038	10.153	10.814	10.911	10.68	10.506	10.787	10.565	10.531	10.539	10.215	10.475	10.774
ARF3	12.708	12.565	11.625	10.403	10.7	10.687	10.237	10.186	10.21	10.585	12.651	12.081	11.909	11.187	10.461	10.644	10.373	10.397	10.413	10.679
ARF5	12.692	13.062	12.018	10.138	11.27	11.573	11.355	11.191	11.339	11.655	12.684	12.579	12.122	10.717	11.203	11.555	11.356	11.22	11.543	11.75
ARF6	12.098	12.708	11.701	10.789	11.317	11.387	11.104	10.995	10.89	11.233	12.311	12.199	11.934	11.417	11.203	11.426	11.259	11.248	11.186	11.394
ARFGAP3	9.414	9.857	8.567	7.669	7.83	7.816	7.426	7.306	7.829	8.169	9.372	9.402	8.885	7.865	7.862	7.616	7.552	7.457	8.071	8.431
ARFGEF1	6.805	6.668	6.431	6.125	6.282	6.68	5.981	6.202	6.345	6.951	6.8	6.475	5.993	6.65	5.813	6.413	6.357	6.476	6.331	6.752
ARFGEF2	6.923	7.297	8.228	8.209	8.52	8.624	8.747	8.046	8.239	8.588	7.203	7.219	7.761	8.411	8.34	8.169	8.749	8.099	8.467	8.566
ARFIP1	11.877	11.972	11.745	9.922	10.095	10.199	10.652	9.996	10.142	10.194	11.867	11.849	11.797	10.648	9.958	10.328	10.355	10.037	10.371	10.456
ARFIP2	11.336	11.457	10.823	9.107	9.602	9.461	9.31	8.86	9.143	9.396	11.522	11.163	10.921	9.99	9.349	9.124	9.371	9.069	9.346	9.397
ARFRP1	9.284	10.024	9.839	9.177	9.866	10.169	9.782	9.149	9.677	10.213	9.541	9.802	9.648	9.63	9.642	9.585	9.819	9.277	9.835	9.925
ARFRP2	7.284	7.06	6.517	5.31	6.192	6.282	5.655	5.739	5.871	6.174	7.658	6.941	6.693	5.669	6.183	5.939	5.93	5.727	6.052	6.113
ARG2	9.877	7.896	6.57	7.123	8.539	6.81	6.438	7.144	6.888	8.104	9.707	7.617	8.245	7.034	8.214	6.733	6.088	9.086	8.067	8.478
ARHGAP1	12.08	12.583	12.125	10.456	10.868	10.85	10.691	10.59	10.604	11.125	12.136	12.008	12.117	11.086	10.683	10.716	10.483	10.576	10.702	11.121
ARHGAP11A	6.926	6.234	5.678	4.686	4.963	4.959	4.544	4.808	4.714	4.771	7.26	6.118	5.391	4.944	4.554	4.695	4.721	4.981	4.781	4.609
ARHGAP12	9.079	8.424	7.67	6.775	7.104	6.885	6.966	6.718	6.854	7.323	8.897	8.217	7.668	7.116	6.939	6.821	7.207	7.091	7.226	7.447
ARHGAP15	5.69	6.184	6.19	5.894	6.019	6.096	5.706	5.568	5.877	6.033	6.001	5.703	6.123	6.294	5.811	5.846	5.936	5.853	5.928	6.036
ARHGAP17	11.829	12.536	12.431	11.568	12.046	12.139	11.957	11.499	11.514	11.891	12.254	12.211	12.377	12.193	11.842	11.932	11.969	11.489	11.665	11.955
ARHGAP18	9.957	11.1	11.128	8.869	10.042	9.842	9.907	10.079	9.967	10.421	10.31	10.957	11.408	8.98	9.737	9.731	9.991	9.797	9.933	10.287
ARHGAP19	5.581	4.989	5.173	4.628	4.847	4.824	4.767	4.619	4.76	4.791	5.589	4.852	4.893	4.994	4.619	4.698	4.818	4.715	4.805	4.791
ARHGAP20	5.531	5.46	5.298	4.23	4.669	4.464	4.417	4.344	4.456	4.594	5.325	5.248	5.348	4.833	4.645	4.466	4.505	4.724	4.409	4.571
ARHGAP21	13.263	13.009	12.962	12.647	12.772	12.611	12.889	12.324	12.013	12.201	13.04	12.73	13.267	12.941	12.898	12.481	12.843	12.625	12.281	12.45
ARHGAP22	7.978	8.436	8.255	6.38	7.701	8.222	8.174	7.805	7.947	8.099	8.206	7.703	8.214	7.537	7.631	8.127	8.306	7.991	8.137	8.09
ARHGAP23	4.831	4.712	4.9	5.003	4.754	4.922	4.846	4.872	4.872	5.201	4.862	4.801	4.741	5.116	4.452	4.551	4.936	4.903	5.221	5.391
ARHGAP24	10.38	9.865	9.649	6.997	7.789	8.241	8.419	8.249	7.75	8.237	8.739	9.656	8.499	7.166	7.652	8.537	8.282	9.396	8.311	8.529
ARHGAP26	7.647	7.695	7.688	6.252	6.65	6.839	7.46	6.919	7.052	6.5	8.063	7.53	7.581	6.672	6.678	6.541	7.298	6.557	6.872	6.446
ARHGAP27	8.851	9.726	10.18	7.539	8.46	8.285	8.025	7.991	8.405	8.383	8.917	9.345	10.014	7.734	8.596	8.15	8.521	8.27	8.764	8.777
ARHGAP6	6.013	6.049	6.103	5.857	6.058	6.32	6.078	6.083	5.638	5.829	6.005	5.613	6.022	6.282	6.572	6.463	5.949	6.234	5.939	5.735
ARHGAP8	6.34	5.994	5.619	5.123	5.028	4.955	5.517	4.693	5.055	4.879	6.131	5.179	5.26	5.247	4.786	5.011	5.096	4.903	5.132	4.986
ARHGAP9	4.343	5.11	4.613	4.447	5.147	5.026	4.537	4.737	5.087	4.971	4.685	4.388	4.677	4.558	5.05	4.881	4.771	4.871	5.043	5.167
ARHGDIA	7.787	7.758	7.881	6.745	7.252	7.96	6.738	6.575	7.173	7.692	7.826	7.733	7.668	7.193	7.235	7.387	7.036	6.892	7.559	7.496
ARHGDIB	9.272	10.088	10.43	9.863	10.942	10.91	10.224	10.226	10.619	10.657	9.477	9.664	10.343	10.336	11	10.822	10.614	10.501	10.929	10.748
ARHGEF1	13.155	13.412	14.215	14.228	14.413	14.886	14.21	14.082	13.964	14.225	13.371	13.346	13.872	14.295	14.185	14.347	14.429	14.223	14.222	14.113
ARHGEF10	8.44	8.574	8.201	7.605	7.929	7.642	7.442	7.209	7.447	7.536	8.332	8.291	7.912	7.519	7.629	7.603	8.02	7.445	7.36	7.651
ARHGEF11	9.119	9.385	8.857	7.013	7.246	7.605	7.568	6.782	7.194	7.616	9.05	8.813	8.635	7.453	6.859	6.932	7.361	6.861	7.225	7.476
ARHGEF12	9.414	9.687	8.987	8.158	8.377	8.33	8.284	7.961	8.252	8.655	8.945	9.136	8.903	8.502	8.039	7.93	8.172	8.137	8.319	8.765
ARHGEF15	9.146	10.427	10.954	8.526	9.355	9.313	8.91	8.854	8.807	8.906	9.475	10.053	10.947	9.232	9.444	9.244	9.355	9.059	9.19	8.956
ARHGEF16	8.094	8.226	8.426	6.235	7.024	6.89	7.33	6.404	6.815	6.705	7.725	7.298	8.154	6.844	6.776	6.361	7.068	6.247	6.755	6.549
ARHGEF17	12.728	12.769	12.018	9.519	10.087	10.042	9.65	9.78	9.684	9.919	12.869	12.481	12.129	10.219	10.176	10.025	9.839	9.967	9.932	9.92
ARHGEF18	8.715	8.863	8.638	7.82	8.126	8.067	7.891	7.549	7.775	7.843	8.818	8.516	8.644	8.315	8.063	7.965	8.047	7.801	8.003	7.99
ARHGEF19	4.943	4.809	4.879	4.638	4.481	4.668	4.264	4.484	4.39	4.564	4.931	4.861	4.77	5.137	4.586	4.345	4.596	4.965	4.582	4.825
ARHGEF2	11.88	12.534	12.481	9.279	10.374	10.601	10.455	10.015	10.126	10.289	12.423	12.448	12.505	10.142	10.608	10.685	10.787	10.193	10.554	10.45
ARHGEF3	10.406	10.581	10.159	8.602	9.008	8.271	8.348	7.904	7.748	8.578	10.645	10.31	10.342	8.88	8.781	8.498	8.587	8.075	8.196	8.727
ARHGEF4	5.203	4.955	5.028	4.928	4.965	4.847	4.639	5.104	4.763	5.112	4.959	5.133	5.132	5.349	4.624	4.753	4.877	5.203	4.839	5.016
ARHGEF5	7.941	7.949	5.153	4.687	4.564	4.704	4.84	5.038	5.102	4.77	7.776	7.779	4.742	4.685	4.36	4.365	4.667	4.754	4.891	4.619
ARHGEF6	9.482	8.866	8.534	10.546	10.078	9.625	9.37	10.298	8.667	10.422	8.898	9.22	8.742	10.145	9.491	10.572	10.137	11.319	9.629	9.495
ARHGEF7	12.197	11.488	11.232	10.633	10.748	10.354	10.334	9.846	9.819	10.306	11.232	11.112	11.002	10.896	10.471	10.082	10.456	10.025	10.08	10.526
ARHGEF9	10.702	9.974	9.8	7.352	7.939	7.661	7.649	7.226	7.351	7.618	10.191	9.635	9.662	7.617	7.892	7.467	7.941	7.665	7.765	7.666
ARID1B	10.175	10.539	10.457	9.903	10.533	10.963	10.504	10.093	10.243	10.598	10.369	10.295	10.009	10.114	10.216	10.551	10.73	10.241	10.326	10.362
ARID2	11.412	11.287	10.918	9.877	10.035	9.997	9.861	9.524	9.475	9.826	11.414	10.984	10.787	10.356	9.785	9.83	10.016	9.782	9.708	9.853
ARID3A	9.109	8.835	7.08	6.481	6.802	7.316	7.514	6.851	6.775	7.284	9.247	8.197	6.894	6.803	6.482	7.259	7.319	6.776	6.746	7.111
ARID4A	8.571	8.543	8.401	7.483	7.408	7.726	7.673	7.602	7.4	7.729	8.299	8.212	8.117	7.637	7.151	7.728	7.788	7.827	7.741	8.042
ARID4B	10.145	9.952	9.586	8.74	9.256	9.162	9.04	8.471	8.526	8.962	10.103	9.673	9.265	8.737	8.883	8.837	9.234	8.646	8.756	8.85
ARID5A	4.732	4.895	4.859	4.792	4.825	4.505	4.435	4.714	4.969	4.704	5.177	4.868	4.686	4.958	4.605	4.562	4.701	5.185	4.873	4.816
ARID5B	7.609	7.622	7.687	11.05	8.928	7.941	8.019	7.359	7.311	7.958	7.527	7.352	7.317	9.713	8.661	7.831	8.116	7.763	7.45	8.01
ARIH1	8.414	8.464	8.342	7.926	8.238	8.573	8.185	8.111	8.138	8.438	8.468	8.231	8.196	8.335	8.089	8.292	8.358	8.31	8.302	8.408
ARIH2	9.172	9.149	9.803	10.185	10.663	11.035	10.752	10.74	11.024	11.261	9.42	8.737	9.036	10.407	10.487	11.128	11.234	11.257	11.318	11.353
ARL1	11.375	11.573	11.021	10.659	11.958	11.989	11.973	11.747	11.883	12.107	11.702	11.426	11.451	11.339	11.817	11.84	12.289	11.894	12.269	12.178
ARL11	5.306	5.979	6.251	5.971	9.378	9.524	8.718	9.401	9.365	9.346	5.487	5.2	6.246	5.684	8.596	8.697	8.431	8.643	8.873	8.932
ARL2BP	11.689	11.623	10.908	10.036	10.648	10.864	10.851	10.347	10.292	11.002	11.575	11.558	11.389	10.753	10.662	10.831	10.93	10.453	10.539	11.205
ARL3	13.018	13.101	12.101	9.314	10.457	10.741	10.995	10.277	10.251	10.591	13.064	12.799	12.277	10.223	10.664	10.702	10.743	10.126	10.474	10.681
ARL4A	9.344	10.226	9.845	8.288	9.204	9.653	10.147	9.056	9.131	9.389	9.403	10.154	9.7	8.662	9.283	9.226	10.057	9.137	9.404	9.314
ARL6	7.447	7.52	7.166	5.942	6.541	6.754	6.475	6.637	6.587	7.184	7.39	7.247	7.065	6.348	6.227	6.57	6.694	6.55	6.697	7.193
ARL6IP	13.321	13.213	12.265	10.335	11.102	11.075	11.069	10.496	10.836	10.887	13.292	12.689	12.228	10.596	11.195	11.118	10.998	10.665	11.258	11.247
ARL6IP2	9.721	9.954	10.431	10.009	10.188	10.928	10.299	9.87	9.76	10.465	10.064	9.767	10.033	10.569	9.877	10.612	10.35	10.017	10.106	10.268
ARL6IP4	12.221	12.981	12.607	11.466	11.62	11.92	11.83	11.302	11.363	11.814	12.239	12.748	12.68	11.924	11.425	11.366	11.823	11.467	11.672	11.751
ARL6IP5	10.811	11.358	11.608	9.637	10.249	10.573	10.703	10.058	10.39	10.551	11.038	11.617	11.848	10.21	10.402	10.443	10.619	10.246	10.798	10.965
ARL6IP6	11.076	11.258	10.861	9.472	10.311	10.115	10.806	9.824	10.06	10.124	11.395	10.878	10.807	10.018	10.025	9.996	10.464	9.825	10.221	10.088
ARMC1	10.153	10.243	9.981	8.938	9.599	9.725	9.61	9.114	9.194	9.404	10.305	10.119	9.895	9.672	9.305	9.581	9.489	9.269	9.503	9.444
ARMC4	5.208	4.686	4.802	4.31	4.529	4.723	4.53	4.514	4.312	4.692	5.289	4.767	4.501	4.63	4.503	4.433	4.551	4.737	4.43	4.696
ARMC5	10.081	10.691	10.413	9.088	9.297	9.383	9.283	9.102	9.122	9.629	10.176	10.376	10.437	9.725	8.925	9.128	9.375	9.301	9.43	9.723
ARMC6	10.902	11.521	11.251	10.058	12.804	13.078	12.529	12.196	12.129	12.111	11.149	11.198	11.149	10.866	12.822	12.529	12.525	12.14	12.35	11.974
ARMC8	6.149	6.319	6.295	6.02	6.323	6.946	7.137	6.379	6.391	6.605	6.215	6.291	6.268	6.416	6.556	6.942	6.664	6.525	6.774	7.186
ARMCX1	10.368	10.58	9.991	7.946	8.916	8.83	8.63	8.378	8.424	8.767	10.493	10.542	10.159	8.54	8.849	8.457	8.833	8.515	8.782	8.936
ARMCX2	11.2	11.331	10.568	6.305	7.09	7.097	6.975	6.657	6.568	6.934	11.418	11.373	10.693	7.102	7.231	6.933	7.169	6.818	7.048	6.977
ARMCX3	11.218	11.296	11.378	10.389	11.191	10.519	10.278	9.923	9.649	10.574	11.481	11.447	11.308	10.494	11.009	10.543	10.2	9.997	9.538	9.946
ARMCX5	8.384	8.071	7.409	6.583	7.222	6.762	6.884	6.415	6.681	7.081	8.31	7.697	7.456	6.975	7.121	6.482	7.145	6.585	6.89	7.116
ARMCX6	12.978	13.505	13.08	7.981	9.179	9.015	9.04	8.934	8.438	8.846	13.361	13.507	13.169	9.027	9.136	8.948	9.136	8.892	8.67	8.689
ARNT	7.346	7.512	7.432	6.939	7.081	7.213	7.092	6.88	6.738	7.048	7.648	7.295	7.171	7.305	6.811	6.911	7.244	6.759	6.96	7.054
ARNT2	8.11	7.347	6.66	4.985	5.004	5.013	4.709	4.839	5	4.881	7.946	6.896	6.579	5.509	4.825	4.855	5.005	4.937	5.128	4.975
ARNTL	7.674	8.602	9.221	10.269	9.533	9.197	9.378	9.281	8.924	9.68	7.576	8.289	8.817	9.597	8.814	9.295	9.605	9.495	8.697	9.593
ARNTL2	4.631	5.082	4.867	4.263	4.409	4.406	4.663	4.519	4.257	4.38	4.63	4.541	5.072	4.773	4.203	4.657	4.631	5.013	4.51	4.654
ARPC1A	12.056	11.952	10.783	10.178	9.815	9.515	9.405	9.577	9.537	10.806	12.152	11.388	10.643	10.516	9.387	9.287	9.481	9.859	9.704	10.84
ARPC1B	10.342	10.415	10.296	9.233	9.276	9.317	9.199	8.849	9.254	9.448	10.375	10.212	9.995	9.601	8.984	9.014	9.223	9.012	9.39	9.449
ARPC3	10.718	10.771	10.097	9.019	8.564	8.323	8.056	8.202	8.722	9.35	10.795	10.112	9.505	9.171	8.367	8.126	8.296	8.206	9.058	8.918
ARPC4	8.622	8.233	7.608	5.972	6.449	6.615	6.26	6.212	6.358	6.682	8.297	7.892	7.908	6.583	6.377	6.609	6.51	6.458	6.6	6.929
ARPC5	10.721	10.534	9.727	8.035	8.613	8.137	8.006	7.934	8.338	8.519	10.783	10.236	9.878	8.61	8.622	8.34	8.378	8.245	8.66	8.792
ARPC5L	13.073	13.331	12.746	13.014	13.732	14.111	14.278	13.688	13.71	14.198	13.31	13.009	12.872	13.563	13.69	13.898	14.137	13.861	13.963	14.267
ARPP-19	9.171	9.118	9.153	9.595	10.605	11.041	10.989	11.065	11.258	11.747	9.081	9.119	9.127	9.744	10.475	10.838	11.185	11.456	11.667	12.133
ARRB1	9.142	9.66	8.992	6.748	7.911	8.131	7.839	7.585	7.908	7.935	9.029	9.055	9.142	7.484	7.913	7.747	8.108	7.764	8.187	7.948
ARRB2	8.594	8.634	8.303	6.505	7.32	7.389	7.065	6.682	7.115	7.342	8.686	8.461	8.062	7.353	7.005	6.834	7.461	6.959	7.244	7.263
ARRDC1	11.489	12.319	11.959	9.681	11.264	11.458	11.461	11.191	11.654	11.565	11.858	12.171	11.89	9.89	11.015	11.14	11.454	11.269	11.682	11.591
ARRDC2	9.938	10.775	10.939	15.773	14.904	14.103	14.351	12.919	12.955	14.29	9.841	10.176	10.81	15.184	14.263	13.908	13.851	12.945	13.277	14.811
ARRDC3	9.524	8.723	8.89	7.866	8.138	8.14	7.524	7.432	7.543	7.431	9.087	8.671	8.42	8.06	8.079	7.933	7.999	7.637	8.011	7.516
ARRDC4	11.35	11.249	10.273	11.6	9.928	9.725	9.744	9.14	9.327	9.749	11.491	10.814	10.4	10.894	9.995	9.811	9.62	9.542	9.43	9.963
ARSA	9.708	11.008	10.456	9.8	10.074	10.034	10.022	9.538	10.02	10.366	9.716	10.314	10.365	10.371	9.834	9.867	10.05	9.736	10.247	10.432
ARSD	7.719	7.596	7.177	6.575	6.485	6.469	6.383	6.023	6.313	6.441	7.883	7.471	7.15	6.941	6.134	6.097	6.268	6.114	6.481	6.373
ARSK	7.986	8.355	8.599	5.419	7.229	7.582	7.472	7.15	7.681	7.627	8.393	8.532	8.289	6.769	7.518	7.884	8.198	7.781	8.281	8.069
ART1	6.03	6.369	6.372	6.091	6.242	6.016	6.579	6.185	6.347	6.535	6.268	6.012	6.167	6.439	5.87	5.91	7.382	6.098	6.567	6.801
ART3	7.013	7.97	12.295	15.239	13.687	12.676	13.386	12.048	11.827	13.315	7.464	9.085	11.262	15.403	13.25	12.704	13.086	12	11.773	13.613
ARVCF	11.849	12.499	12.779	12.098	12.225	12.296	12.376	12.003	12.001	12.206	12.057	12.191	12.746	12.568	11.875	11.957	12.316	11.996	12.16	12.173
ARX	7.826	6.968	7.138	7.722	7.64	7.915	8.508	7.56	7.111	7.208	7.416	8.877	7.337	7.356	7.47	8.312	8.301	8.092	7.35	7.221
AS3MT	10.702	11.094	10.527	8.976	9.855	9.915	9.98	10.032	10.259	10.54	10.739	10.951	10.528	9.675	9.894	9.944	10.157	10.154	10.546	10.703
ASAH1	11.524	11.77	11.222	8.749	10.122	10.477	10.746	10.333	10.568	10.426	12.038	11.483	11.081	9.772	10.346	10.54	11.062	10.66	11.219	10.726
ASAH3L	6.711	6.971	6.874	6.746	6.737	6.584	6.359	6.135	6.137	6.461	7.061	6.676	6.629	7.158	6.362	6.079	6.573	6.382	6.299	6.391
ASAHL	5.522	7.679	7.073	4.962	5.981	5.923	5.559	5.468	6.389	6.059	6.533	6.73	7.165	5.265	5.987	5.581	5.676	5.762	6.325	6.25
ASB1	9.321	9.357	9.467	9.033	9.103	9.314	8.851	8.625	9.032	9.288	9.511	9.199	9.312	9.233	9.041	8.939	9.137	8.904	9.386	9.309
ASB10	8.082	8.882	9.563	8.84	9.041	9.473	9.433	8.923	9.264	9.413	8.429	8.802	9.355	9.008	8.79	9.166	9.666	9.182	9.627	9.397
ASB11	8.019	8.863	9.692	10.255	11.55	11.963	12.038	11.352	11.256	11.863	7.977	9.177	9.777	10.177	11.24	11.613	11.906	11.433	11.61	11.761
ASB12	7.768	10.246	12.61	13.244	14.936	15.245	14.774	14.702	14.562	14.793	8.623	11.222	12.033	13.23	14.391	14.648	15.094	14.478	14.715	14.542
ASB13	7.847	7.762	7.474	6.321	6.308	6.466	5.945	5.666	5.938	5.913	7.926	7.303	7.429	6.81	5.989	6.123	6.125	5.883	6.121	6.019
ASB14	4.913	5.35	5.36	4.682	8.266	8.752	8.576	8.16	8.287	8.35	4.772	5.441	5.127	5.201	7.799	8.072	8.435	8.102	8.367	8.29
ASB15	6.118	8.246	10.426	8.633	10.844	11.47	11.38	11.519	11.305	10.576	6.755	9.119	10.225	8.419	10.522	11.035	11.313	11.162	11.097	10.395
ASB16	7.429	7.848	8.442	8.368	9.991	10.832	9.814	9.944	9.929	10.246	7.634	7.779	8.212	8.545	9.698	10.35	10.156	9.993	10.225	10.198
ASB18	4.604	4.811	4.954	4.725	4.362	4.731	4.396	4.466	4.893	4.442	4.562	4.468	4.564	4.804	4.675	4.42	4.785	4.898	4.799	4.66
ASB2	11.749	12.357	13.609	15.255	15.935	16.108	15.738	15.705	15.524	15.993	12.484	13.118	13.295	14.885	15.269	15.698	15.966	15.795	15.848	16.156
ASB3	7.675	7.733	7.949	6.649	6.929	7.065	7.038	6.796	6.646	7.078	7.749	7.807	7.594	6.968	6.763	6.902	6.978	7.007	6.976	7.158
ASB4	5.982	6.211	6.861	6.377	7.571	7.775	7.741	7.061	7.245	7.694	6.411	6.398	6.454	6.535	7.188	7.294	7.802	7.038	7.515	7.693
ASB5	7.656	8.566	10.371	12.377	12.315	11.659	11.523	11.42	11.204	12.32	8.276	9.761	10.089	11.468	12.132	11.394	11.783	12.553	11.851	12.782
ASB6	10.273	10.988	10.186	9.025	9.666	9.668	9.614	9.079	9.096	9.514	10.256	10.374	10.248	9.351	9.474	9.443	9.631	9.15	9.351	9.529
ASB7	6.002	6.122	5.968	4.981	5.971	6.106	5.6	5.497	5.901	6.071	6.309	6.006	5.852	5.564	5.656	5.701	5.807	5.525	5.969	5.982
ASB8	9.714	10.254	10.256	10.039	10.471	10.915	11.063	10.501	10.563	10.758	9.819	9.982	10.145	10.449	10.335	10.79	11.194	10.588	10.789	10.931
ASB9	9.685	9.013	8.42	5.513	6.457	6.427	6.452	6.184	5.675	5.808	8.449	8.766	8.405	6.614	6.365	6.228	6.582	6.232	6.078	5.635
ASCC1	11.159	11.118	10.766	12.849	13.326	12.299	12.345	11.422	10.977	12.171	11.202	10.866	10.769	12.196	13.025	11.854	12.428	10.696	11.372	11.73
ASCC2	11.363	12.267	12.066	12.484	12.427	12.661	12.724	11.96	12.263	12.644	11.656	11.807	12.11	13.272	12.385	12.485	12.511	12.308	12.541	12.781
ASCC3	8.076	8.477	8.104	6.915	7.161	7.461	7.245	7.099	7.404	7.697	8.322	8.311	7.92	7.422	7.055	7.149	7.232	7.214	7.569	7.755
ASCL4	7.971	8.058	7.569	7.737	7.232	7.435	7.602	7.272	7.73	7.514	8.063	7.884	7.829	7.84	7.197	7.483	7.466	7.308	7.7	7.889
ASF1A	10.285	10.297	9.992	9.277	9.968	10.17	9.951	9.83	9.818	10.189	10.436	10.093	9.919	9.673	9.726	9.943	10.156	9.988	10.016	10.233
ASF1B	8.971	9.043	8.868	8.761	7.539	6.968	7.125	5.845	6.439	5.936	9.195	8.956	8.883	10.002	7.357	6.585	7.106	5.818	6.519	5.692
ASGR1	4.83	8.084	4.814	5.41	5.705	5.391	5.56	5.231	5.234	6.307	4.861	6.824	5.595	5.788	5.005	5.713	5.076	5.655	5.212	6.457
ASH1L	8.204	8.307	8.266	7.449	7.726	8.132	7.633	7.447	7.693	7.999	8.343	8.237	7.962	7.736	7.643	7.695	7.853	7.651	7.909	7.978
ASH2L	11.703	11.755	11.275	9.941	10.537	10.713	10.871	10.247	10.12	10.238	11.689	11.454	11.437	10.776	10.331	10.557	11.006	10.476	10.443	10.524
ASIP	7.787	9.825	6.067	6.19	6.807	7.829	6.847	7.176	7.185	7.846	10.174	9.921	9.005	6.994	7.429	7.363	4.555	7.429	7.649	7.219
ASL	9.381	9.974	9.677	8.844	9.356	9.465	9.251	8.885	9.112	9.491	9.349	9.36	9.495	9.285	9.091	9.155	9.453	8.962	9.347	9.47
ASMT	8.352	7.827	7.472	6.551	6.684	6.648	7.308	6.581	6.537	6.275	9.267	8.321	7.96	7.144	6.78	6.712	6.984	6.632	6.76	6.546
ASMTL	7.879	8.464	9.033	9.054	9.899	9.873	9.383	9.117	9.092	9.214	7.869	8.328	8.811	9.106	9.773	9.46	9.602	9.192	9.407	9.149
ASNA1	5.086	5.453	5.157	4.973	4.993	5.231	4.756	4.597	5.526	5.682	5.241	4.761	5.093	5.462	4.78	5.077	4.79	5.063	5.795	5.848
ASNS	12.511	12.987	12.651	9.538	10.21	8.961	8.145	8.188	8.54	8.533	13.183	13.506	12.905	9.792	9.928	8.582	8.361	8.073	8.914	9.052
ASPH	9.941	9.916	9.224	8.737	8.711	8.577	8.88	8.336	8.89	9.001	9.931	9.416	9.299	9.175	8.677	8.352	8.77	8.46	9.036	9.331
ASPN	13.659	12.655	12.059	8.412	9.889	9.101	8.603	8.764	8.906	9.751	13.936	13.946	12.689	9.054	9.698	8.877	8.954	8.688	9.269	9.37
ASPSCR1	11.054	11.729	11.633	10.468	10.859	11.227	11.1	10.656	11.14	11.44	11.282	11.385	11.383	11.151	10.705	10.932	11.141	10.97	11.392	11.361
ASS	10.908	9.645	9.468	10.502	10.72	11.991	11.758	11.091	11.313	11.439	10.949	9.935	9.441	10.936	10.61	11.425	11.637	11.318	11.547	11.34
ASTN2	7.577	7.383	6.755	6.397	7.084	7.318	6.96	6.849	6.31	6.91	7.763	7.188	6.7	6.719	7.11	7.307	7.501	7.478	6.667	7.091
ATAD3B	11.411	12.092	11.191	11.841	10.898	10.63	10.857	10.059	10.526	10.803	11.706	11.498	11.272	12.339	10.619	10.408	10.741	10.331	10.935	10.955
ATBF1	9.488	8.826	8.468	7.369	8.268	8.926	8.373	8.312	8.347	8.561	9.253	8.326	8.065	8.24	8.067	8.432	8.463	8.303	8.374	8.388
ATCAY	7.094	7.272	7.391	7.187	7.165	7.25	7.115	6.891	7.016	7.196	7.555	6.979	7.284	7.397	7.047	6.86	7.223	7.007	7.201	7.078
ATE1	6.606	6.503	6.617	7.607	7.254	7.187	7.09	6.822	6.862	7.222	6.84	6.581	6.536	7.811	7.073	6.911	6.982	6.982	6.953	7.603
ATF1	11.599	11.869	11.463	11.813	11.911	12.274	12.387	12.147	11.792	12.256	11.746	11.669	11.697	11.832	11.598	12.051	11.94	12.273	12.021	12.459
ATF3	7.923	9.745	10.054	13.663	12.622	11.067	9.618	11.565	10.992	11.84	8.308	9.087	9.631	13.665	14.042	12.491	11.671	12.65	11.709	11.89
ATF4	6.648	6.731	6.493	7.873	9.353	9.785	9.173	9.312	9.345	9.808	7.001	6.51	6.157	8.089	8.995	9.445	9.313	9.267	9.344	9.51
ATF6	7.226	6.515	6.336	6.339	7.093	7.221	6.35	6.426	6.338	6.525	7.138	6.355	6.501	7.312	6.59	6.547	6.842	6.608	6.446	6.86
ATF7	8.638	8.892	8.867	8.17	8.466	8.339	8.118	7.765	7.836	7.982	9.108	8.725	8.55	8.355	8.324	8.044	8.197	7.876	7.933	7.881
ATF7IP	8.358	8.585	8.632	8.449	8.75	8.872	8.686	8.425	8.844	8.702	8.457	8.309	8.43	8.355	8.365	8.526	8.614	8.605	8.938	8.699
ATF7IP2	4.296	4.65	4.347	4.648	4.513	4.789	4.475	4.627	4.411	4.564	4.506	4.371	4.544	5.041	4.553	4.677	4.549	5.006	4.205	4.612
ATG5	8.664	8.672	8.228	7.492	8.725	8.968	8.863	8.498	8.443	8.861	8.747	8.546	8.346	8.472	8.595	8.86	9.022	8.873	8.911	9.091
ATG9	11.285	11.86	12.057	12.161	13.134	13.375	13.312	12.732	12.755	13.118	11.442	11.628	12.023	12.439	12.786	12.93	13.355	12.75	13.009	13.028
ATIC	8.824	8.847	8.447	8.483	9.013	9.408	9.024	8.709	9.028	9.078	9.437	8.983	8.274	8.78	8.806	9.161	9.029	8.901	9.22	9.072
ATOH1	5.109	5.08	4.978	4.955	4.741	4.868	5.031	4.939	5.114	5.056	5.645	4.82	4.684	5.344	4.658	5.071	5.181	4.931	5.311	5.213
ATOH7	4.631	4.976	4.585	4.456	4.377	4.402	4.052	4.184	4.624	4.855	4.695	4.442	4.321	4.715	4.087	4.012	4.379	5.083	4.718	4.756
ATOH8	10.978	11.177	11.267	13.721	11.182	10.183	9.397	10.264	9.752	10.989	10.849	10.716	11.143	13.194	10.819	10.261	9.188	10.594	10.016	10.996
ATOX1	13.484	13.936	13.225	11.414	12.246	12.512	12.728	12.412	12.961	13.136	13.889	13.726	13.223	11.963	12.072	11.902	12.814	12.419	13.103	13.096
ATP10A	7.675	8.076	7.189	5.882	6.067	5.378	4.949	5.075	5.119	5.564	8.1	7.261	7.209	5.783	5.677	5.315	5.173	5.031	5.431	5.773
ATP10B	6.701	7.113	6.524	5.784	6.587	6.641	6.591	6.409	6.004	6.399	6.831	6.466	6.504	6.46	6.532	6.711	6.489	6.6	6.293	6.3
ATP10D	6.013	6.355	6.237	4.87	5.802	5.579	5.464	5.319	5.303	5.355	6.436	6.274	6.093	5.209	5.664	5.236	5.336	5.466	5.415	5.327
ATP11A	11.179	11.207	10.547	8.095	8.449	8.74	8.749	8.077	8.005	8.18	11.727	10.867	10.379	8.659	8.297	8.375	8.955	8.282	8.27	8.237
ATP11B	8.15	7.978	7.478	6.199	6.791	6.809	6.788	6.433	6.583	6.663	8.41	7.89	7.269	6.531	6.713	6.505	6.895	6.709	6.753	6.698
ATP1A1	11.059	11.073	9.659	10.904	9.824	9.196	8.454	8.449	8.362	9.892	11.005	10.421	9.858	9.462	9.305	8.658	8.578	8.561	8.71	10.129
ATP1A2	12.592	12.514	13.899	14.226	14.509	14.984	15.137	14.723	14.761	14.658	12.641	12.704	13.869	15.287	14.916	14.975	15.047	15.009	15.032	14.606
ATP1A3	6.423	6.269	6.983	7.311	7.211	7.716	7.282	7.147	7.001	7.204	6.493	6.121	6.841	7.549	7.368	7.439	7.347	7.249	7.38	7.245
ATP1A4	4.855	5.516	5.765	5.333	4.821	4.893	4.818	4.872	5.07	5.044	5.498	5.201	5.459	5.435	4.631	4.534	4.719	5.063	4.926	5.01
ATP1B1	6.623	6.983	7.783	9.375	10.075	9.934	8.928	8.672	9.155	9.957	6.258	6.517	7.488	9.508	9.911	9.547	9.249	9.114	9.693	9.4
ATP1B2	7.175	7.443	7.637	5.715	6.384	6.226	6.247	6.365	5.894	6.336	7.218	7.446	7.579	6.327	6.082	6.137	6.782	6.408	6.074	6.005
ATP1B3	12.078	12.214	11.109	10.798	10.41	10.328	10.206	10.089	9.943	10.107	12.018	11.872	11.323	11.291	10.355	9.928	10.517	10.366	10.309	10.286
ATP1B4	4.832	6.223	6.807	4.752	4.86	4.99	5.459	5.166	5.169	5.268	5.386	6.5	6.628	5.027	4.529	5.093	5.523	5.115	5.363	5.221
ATP2A2	9.105	8.844	8.632	9.77	9.743	10.185	10.014	9.725	9.936	10.17	9.212	8.702	8.792	9.96	9.885	10.106	10.485	9.987	10.489	10.532
ATP2A3	4.836	4.58	4.511	4.537	4.39	4.506	4.465	4.495	4.625	4.424	4.977	5.203	4.572	4.808	4.553	4.135	4.491	4.643	4.32	4.478
ATP2B1	11.65	11.284	10.6	10.669	11.522	11.969	11.95	11.709	11.508	11.929	11.686	11.167	10.54	11.028	11.508	11.783	11.579	11.71	11.502	11.89
ATP2B2	6.229	4.718	5.02	4.696	6.548	8.171	7.503	7.253	7.721	7.647	4.666	4.428	4.83	5.142	6.08	7.57	7.241	6.998	7.427	7.534
ATP2B3	7.394	6.295	5.337	5.393	5.072	4.856	5.129	4.879	5.07	5.067	6.182	5.408	5.091	5.73	4.853	4.741	5.129	5.095	5.174	5.125
ATP2B4	9.384	9.473	9.236	6.601	7.484	7.436	7.136	7.13	7.33	7.486	9.637	9.402	9.087	6.984	7.573	7.26	7.459	7.238	7.505	7.489
ATP2C1	9.601	9.736	9.441	8.19	8.836	9.22	8.888	8.674	8.814	9.09	9.64	9.505	9.449	8.934	9.008	8.818	8.943	8.755	9.125	9.183
ATP4A	5.291	5.444	5.725	5.882	5.418	5.483	5.543	5.387	5.259	5.481	5.605	5.02	5.416	6.071	5.171	5.119	5.626	5.381	5.517	5.56
ATP5A1	10.348	10.316	10.521	10.852	11.059	11.442	10.958	10.891	11.156	11.355	10.418	10.281	10.48	11.56	11.281	11.313	11.544	11.468	11.756	11.596
ATP5B	15.179	15.894	15.942	16.206	16.559	16.809	16.729	16.379	16.47	16.545	15.367	15.377	15.845	16.697	16.553	16.542	16.912	16.712	16.937	16.697
ATP5C1	14.138	15.141	15.032	15.514	15.818	15.848	15.996	15.402	15.575	15.621	14.462	14.792	14.927	16.165	15.758	15.602	16.08	15.64	15.915	15.696
ATP5D	11.725	12.898	13.131	14.056	14.122	14.576	13.859	13.428	13.866	14.142	12.047	12.495	12.915	14.388	14.299	14.045	14.179	13.81	14.357	13.978
ATP5E	9.337	9.69	9.652	9.574	10.184	9.769	10.173	9.985	9.728	9.814	9.539	10.348	9.271	10.03	10.037	9.915	9.964	9.582	9.847	9.699
ATP5F1	9.842	10.026	9.925	10.612	10.619	10.695	10.624	10.552	10.682	10.883	9.897	9.979	10.092	11.158	10.621	10.491	10.961	10.836	11.016	11.022
ATP5G2	15.383	16.055	15.905	16.028	15.673	16.007	15.644	15.335	15.449	15.754	15.86	15.742	15.807	16.431	15.644	15.597	15.894	15.638	15.934	15.778
ATP5G3	14.562	15.409	14.802	15.027	15.6	15.778	15.585	15.281	15.635	15.506	14.931	14.917	15.055	15.907	15.852	15.671	15.956	15.642	16.075	15.787
ATP5H	8.743	9.301	9.114	9.302	9.227	9.498	9.285	8.77	9.601	9.184	9.14	9.136	9.125	9.82	9.385	9.37	9.394	9.178	9.912	9.265
ATP5J	12.814	13.137	12.994	13.606	13.852	14.033	13.999	13.664	13.775	14.018	13	13.019	12.784	13.95	13.912	13.73	14.251	13.862	14.222	13.972
ATP5L	13.09	13.939	13.622	13.748	14.069	14.299	14.217	13.828	13.944	14.395	13.388	13.638	13.457	14.205	14.076	14.046	14.37	14.047	14.34	14.394
ATP5O	11.782	12.497	12.337	12.601	12.87	13.019	13.032	12.544	12.716	12.907	11.979	12.389	12.406	13.088	13.031	12.889	13.179	12.792	13.137	12.988
ATP5S	9.506	10.481	11.043	10.736	11.795	11.955	12.389	11.625	11.441	11.46	9.358	10.481	10.893	10.77	11.894	11.833	12.511	11.926	12.014	11.721
ATP6A1	12.264	11.735	10.708	9.436	10.364	10.141	10.241	9.702	9.887	10.072	11.831	11.384	11.027	10.534	10.466	10.095	10.043	9.944	10.238	10.334
ATP6AP1	10.572	10.851	10.604	9.75	10.503	10.869	10.288	9.889	10.263	10.529	10.695	10.62	10.551	10.096	10.467	10.378	10.574	10.124	10.74	10.375
ATP6V0A1	13.063	13.404	13.277	14.133	14.019	14.228	14.131	13.818	13.936	14.107	13.231	13.056	13.194	14.245	13.779	13.934	14.289	13.901	14.175	14.182
ATP6V0A2	9.394	9.509	8.884	7.965	8.431	8.283	8.386	8.02	8.129	8.511	9.621	9.17	8.763	8.706	8.258	8.175	8.26	8.291	8.331	8.674
ATP6V0A4	4.462	4.682	4.432	4.387	4.651	4.607	4.493	4.177	4.487	4.533	4.299	4.575	4.295	4.562	4.264	4.481	4.825	4.777	4.607	4.516
ATP6V0B	13.2	13.784	13.766	12.699	13.571	13.476	13.609	13.032	13.256	13.603	13.379	13.363	13.455	13.119	13.413	13.31	13.59	13.111	13.536	13.554
ATP6V0C	13.153	13.057	12.75	12.583	13.527	13.755	13.159	12.718	12.96	13.595	12.931	12.745	12.578	12.776	13.244	13.216	13.329	12.975	13.387	13.352
ATP6V0D1	13.263	13.492	12.869	12.42	13.231	13.362	13.135	12.606	12.805	13.158	13.159	13.105	12.885	13.053	13.011	13.058	12.995	12.716	13.039	13.126
ATP6V0E	11.698	11.931	11.18	11.063	11.13	11.103	11.192	10.77	11.029	11.51	11.865	11.452	11.285	11.603	11.025	10.972	11.169	10.912	11.35	11.64
ATP6V1A	5.734	5.113	5.079	4.718	5.129	4.951	4.534	4.839	4.989	4.967	5.509	4.998	4.825	4.811	4.909	4.559	4.938	4.661	4.785	5.323
ATP6V1B2	7.067	7.137	7.021	6.924	7.142	7.186	6.986	6.9	7.009	7.25	7.054	6.863	6.808	7.167	7.108	7.505	7.236	7.142	7.142	7.304
ATP6V1C1	10.047	10.135	10.003	12.266	10.629	10.477	10.63	10.03	10.191	10.605	9.905	10.087	10.145	12.867	10.682	10.504	10.483	10.186	10.442	10.732
ATP6V1C2	11.715	11.953	11.644	10.225	10.41	10.114	10.024	9.783	9.892	10.088	12.1	11.971	11.858	10.647	10.449	10.267	10.306	10.175	10.28	10.363
ATP6V1D	12.558	12.86	12.559	12.366	12.536	12.324	12.487	12.199	12.391	12.589	12.535	12.746	12.604	12.722	12.258	12.284	12.547	12.338	12.654	12.902
ATP6V1E1	11.527	11.522	10.703	10.283	10.772	10.74	10.82	10.474	10.665	11.059	11.537	11.312	10.928	10.572	10.639	10.656	10.722	10.716	10.915	11.244
ATP6V1E2	6.592	6.919	7.207	5.749	7.048	7.23	6.808	6.521	6.765	6.834	6.241	6.148	6.761	5.774	5.682	5.552	5.667	5.473	6.414	6.428
ATP6V1F	12.318	12.78	12.427	11.756	12.562	12.741	12.811	12.256	12.419	12.704	12.393	12.443	12.376	12.202	12.566	12.511	12.793	12.299	12.649	12.763
ATP6V1G1	15.045	15.314	14.8	14.128	14.549	14.661	14.923	14.457	14.563	14.822	15.374	15.054	14.906	14.931	14.403	14.626	14.888	14.672	14.839	14.983
ATP6V1G2	10.647	8.47	7.671	6.77	7.546	7.775	7.539	7.281	7.747	7.453	9.005	8.019	7.888	7.761	7.781	7.855	7.779	7.798	8.064	7.736
ATP6V1H	8.92	8.867	8.441	7.445	8.897	8.87	8.438	8.185	8.433	8.635	8.799	8.591	8.608	8.445	8.614	8.602	8.579	8.327	8.707	8.825
ATP7A	11.352	11.317	11.505	10.977	11.252	11.555	12.189	11.196	11.262	11.299	11.344	11.191	11.504	11.237	11.007	11.268	11.83	11.08	11.284	11.2
ATP8A1	6.082	5.268	6.258	6.24	7.362	7.27	7.111	6.524	7.028	6.591	6.161	5.077	6.455	6.841	7.352	6.735	7.246	6.553	7.127	6.593
ATP8B1	7.364	7.855	7.899	7.117	6.41	6.141	6.034	5.716	5.995	6.224	7.635	7.668	7.741	6.499	6.49	5.776	6.317	5.743	6.35	6.35
ATP8B2	12.163	12.252	11.328	8.994	9.375	9.072	8.811	8.626	8.788	9.124	12.123	12.09	11.499	9.502	9.474	9.076	9.307	8.628	9.195	9.183
ATP8B3	5.573	5.755	5.58	5.413	5.516	5.459	5.329	5.168	5.279	5.323	5.797	5.278	5.302	5.592	5.233	5.235	5.492	5.315	5.422	5.361
ATP8B4	4.378	4.677	4.492	4.362	4.619	4.618	4.559	4.686	4.511	4.461	4.392	4.773	4.647	4.582	4.65	4.342	4.621	4.812	4.386	4.65
ATP9B	11.234	11.707	11.188	9.113	9.098	8.844	9.078	8.59	8.808	8.869	11.374	11.292	11.332	9.536	9.011	9.083	8.904	8.863	9.153	9.233
ATPAF1	6.035	6.216	6.186	5.767	6.522	7.098	6.685	6.784	6.605	6.756	6.193	6.05	6.178	6.405	6.436	6.795	7.105	7.005	6.928	6.976
ATPAF2	8.565	8.647	8.508	8.489	8.551	8.811	8.036	8.059	8.359	8.68	8.842	8.336	8.329	9.007	8.384	8.543	8.516	8.144	8.815	8.745
ATPBD1B	5.078	4.628	4.717	4.444	4.569	4.554	4.401	4.31	4.661	4.707	4.903	4.353	4.45	4.759	4.763	4.456	4.673	4.792	4.636	4.569
ATR	9.941	9.797	9.06	6.407	7.342	7.348	7.474	6.826	7.171	7.006	10.164	9.462	8.869	7.27	7.366	7.397	7.403	7.117	7.395	7.227
ATRN	5.785	5.977	5.897	5.312	5.49	5.388	5.219	5.124	5.458	5.331	6.26	5.846	5.636	5.833	5.3	5.192	5.304	5.227	5.485	5.435
ATRX	9.622	9.06	9.083	7.472	8.499	9.154	8.932	8.985	7.809	8.034	9.117	9.645	9.443	8.972	8.538	9.429	9.035	9.028	7.932	7.84
ATXN1	7.674	7.844	7.651	8.412	9.41	9.463	9.075	9.108	8.864	9.348	7.555	7.439	7.753	8.635	8.962	9.084	9.349	9.24	8.929	9.129
ATXN10	11.329	11.146	10.524	8.902	9.987	10.321	9.627	9.63	9.828	10.339	11.131	10.6	10.286	9.498	9.827	9.971	9.945	9.915	10.171	10.21
ATXN2	10.741	10.841	10.664	9.815	10.031	10.309	10.151	9.751	9.832	10.416	10.643	10.399	10.554	10.029	9.791	9.898	10.057	9.906	10.164	10.44
ATXN3	8.029	7.932	7.169	6.444	6.304	6.193	6.175	5.918	6.429	6.647	8.026	7.663	7.288	6.673	6.045	6.216	5.986	6.015	6.448	6.877
ATXN7	8.348	8.253	8.22	8.208	8.246	8.478	8.438	8.043	8.331	8.62	8.48	8.106	7.939	8.548	8.087	8.18	8.638	8.388	8.617	8.646
ATXN7L4	9.056	9.599	9.786	8.605	9.268	9.628	9.515	9.329	9.532	9.941	9.12	9.442	9.481	9.042	9.289	9.645	9.473	9.599	9.665	10.135
AU097811	13.466	12.83	12.233	10.497	10.299	10.412	10.432	9.874	9.699	9.817	13.574	12.787	12.357	11.034	9.913	10.323	10.684	9.877	9.871	9.804
AU098098	11.694	12.362	12.069	10.883	11.039	11.144	10.825	10.679	10.826	11.324	12.016	12.028	11.934	11.352	10.833	10.949	10.984	10.834	11.091	11.446
AU231421	7.132	7.256	7.461	7.276	6.953	7.02	6.906	6.603	6.928	7.025	7.395	7.06	7.288	7.447	6.86	6.802	7.053	6.855	7.146	7.124
AU231454	12.105	8.498	6.417	4.993	4.947	5.013	4.778	4.817	5.022	5.236	10.272	7.268	6.966	5.378	4.987	4.724	5.005	4.994	5.08	5.08
AU231664	11.357	12.197	12.481	12.91	12.955	13.157	13.39	13.218	13.192	13.038	11.641	12.159	12.884	13.017	12.683	13.184	13.482	13.397	13.342	13.419
AU231904	11.695	11.198	10.704	9.376	8.449	8.404	8.91	8.217	8.269	7.956	10.792	10.632	11.269	8.896	8.63	8.475	8.718	8.163	8.336	8.177
AU232150	6.143	5.422	5.273	4.527	5.06	4.897	4.527	4.718	4.377	4.959	6.374	5.693	5.13	4.939	4.484	4.829	5.137	4.877	4.628	5.026
AU232185	7.821	8.492	8.831	8.218	8.537	8.647	8.431	8.478	8.554	8.846	8.14	8.665	8.412	8.786	8.285	8.459	8.823	8.879	8.723	8.867
AU232278	8.806	8.283	7.233	4.876	5.492	5.495	5.511	5.481	5.465	5.362	9.025	7.897	7.219	5.445	5.226	5.231	5.519	5.412	5.556	5.674
AU232356	10.615	10.69	10.954	7.809	8.799	9.028	8.845	8.906	8.82	8.541	10.321	10.299	11.121	8.217	9	8.965	9.431	8.971	9.305	8.707
AU232653	12.708	13.321	12.863	12.523	12.532	13.016	12.733	12.592	12.422	12.95	12.947	13.165	12.57	12.912	12.37	12.745	12.637	12.774	12.63	12.943
AU233009	12.442	11.856	10.197	5.881	6.936	7.375	7.397	7.226	7.398	7.3	12	11.515	10.553	6.78	6.899	7.291	7.644	7.144	7.753	7.413
AU233069	12.799	13.143	12.705	12.548	13.398	13.525	13.643	12.995	13.037	13.183	13.061	13.169	12.929	13.514	13.27	13.249	13.459	12.977	13.103	13.14
AU233184	12.605	13.032	13.031	11.579	11.978	12.333	11.995	11.509	11.388	11.782	13.25	12.906	12.592	12.264	11.448	11.867	11.863	11.605	11.333	11.742
AU233909	5.265	5.206	5.491	5.894	6.197	6.82	6.086	6.061	6.613	6.794	5.164	4.999	4.942	5.93	6.199	6.394	6.579	6.427	6.822	6.978
AU233933	6.611	6.522	7.084	5.506	6.49	7.026	6.208	5.868	6.245	6.27	6.833	6.175	6.711	5.902	6.413	6.419	6.515	6.146	6.341	6.144
AU275975	11.69	11.565	10.47	9.628	9.892	10.223	9.812	9.719	9.745	10.507	11.232	11.086	10.69	9.57	9.905	10.386	10.123	10.105	10.265	10.728
AU276016	12.359	11.293	11.234	9.005	8.836	9.15	8.975	8.606	9.209	8.957	12.167	11.047	11.042	9.449	8.844	9.119	10.171	9.41	9.721	9.514
AU276080	11.831	11.68	11.131	10.302	11.474	11.991	12.125	11.58	11.693	12.104	11.709	11.203	10.935	10.66	11.318	11.628	11.793	11.64	11.779	12.285
AU276280	9.632	9.983	8.878	6.954	7.924	7.952	7.501	6.993	7.397	7.512	9.883	9.496	9.049	7.221	8.122	7.834	7.814	7.336	7.73	7.668
AU277390	5.711	5.87	5.36	4.541	4.534	4.639	4.465	4.755	4.464	4.435	6.062	5.385	5.442	4.591	4.826	4.527	4.848	4.774	4.398	4.618
AU277403	8.025	8.552	8.334	7.105	8.297	8.794	8.254	8.142	8.153	8.19	7.784	7.992	8.186	8.307	7.943	8.501	8.281	8.207	8.25	8.158
AU277658	8.136	8.326	9.093	8.24	9.194	9.609	9.69	9.135	9.085	9.065	8.591	9.159	9.188	9.31	9.222	9.724	9.424	9.147	9.105	9.265
AU277879	10.669	9.718	10.034	9.189	10.021	10.448	10.458	10.401	10.175	10.562	10.676	10.157	9.717	9.204	9.696	10.654	10.69	10.576	10.425	10.461
AU278156	6.95	5.688	5.729	5.721	4.94	4.954	4.983	4.89	4.879	5.212	7.106	5.521	5.721	5.497	4.824	4.817	4.882	4.815	5.161	5.14
AU278548	6.114	6.124	6.332	5.253	5.79	6.491	6.148	5.717	5.909	6.199	6.279	5.848	6.179	5.857	5.713	6.172	6.089	5.63	5.867	6.307
AU278561	10.019	9.982	9.549	8.582	8.468	8.657	8.603	8.59	8.512	8.984	9.966	9.758	9.611	8.677	8.202	8.517	8.774	8.562	8.631	8.983
AU278579	11.877	11.883	11.271	10.821	10.191	10.489	10.497	10.193	10.219	10.619	11.422	11.365	11.244	11.009	10.114	10.475	10.587	10.445	10.597	10.873
AU278704	5.401	6.504	6.903	5.953	6.528	6.431	6.234	5.905	5.921	6.288	5.447	6.281	6.823	6.553	6.831	6.512	6.513	6.333	6.255	6.609
AUP1	12.535	13.105	12.736	12.754	12.919	13.067	12.911	12.502	12.754	13.124	12.749	12.605	12.667	13.258	12.652	12.78	12.875	12.718	12.934	13.091
AURKB	9.196	8.753	9.018	8.07	8.568	8.589	8.689	8.294	8.497	8.076	9.448	8.55	8.511	8.307	8.482	8.373	8.865	8.41	8.601	8.089
AURKC	8.321	8.38	8.267	7.063	6.835	6.321	6.407	6.039	6.289	6.832	8.448	8.089	7.89	7.433	6.463	6.094	6.532	6.348	6.565	6.841
AUTS2	10.628	10.129	9.856	8.352	8.314	8.786	8.385	8.333	8.517	9.156	10.573	9.974	9.818	8.536	8.034	8.311	8.811	8.515	8.753	9.122
AV589143	10.04	9.167	8.282	8.205	7.874	8.203	7.774	8.073	7.899	8.981	9.419	8.694	8.464	8.006	7.75	8.18	8.571	8.334	8.135	8.68
AV589806	12.945	12.516	12.649	13.938	14.168	14.261	14.333	14.375	14.663	14.98	13.446	12.773	12.574	14.058	13.897	14.348	14.522	14.822	14.925	15.546
AV589961	7.204	5.656	4.868	4.482	4.884	4.498	4.244	4.453	4.447	4.514	6.315	4.923	4.265	4.886	4.87	4.493	4.321	4.627	4.328	4.691
AV590026	13.37	13.662	13.143	10.536	11.532	12.156	12.197	11.826	11.774	12.071	13.491	13.404	13.156	11.184	11.431	11.937	12.477	11.787	12.046	11.985
AV590083	7.971	4.845	4.791	4.88	4.824	4.871	4.578	4.839	4.63	4.964	5.441	4.6	4.64	4.986	4.497	4.689	4.884	4.975	4.263	4.844
AV590144	10.923	7.712	5.311	4.485	4.724	4.582	4.65	4.873	4.632	4.64	7.624	6.109	5.577	4.59	4.383	4.34	4.692	5.266	4.531	4.624
AV590162	12.999	13.512	12.955	12.92	13.02	13.124	12.736	12.667	12.671	13.462	13.236	13.063	12.832	13.24	12.77	12.946	12.877	12.878	12.93	13.5
AV590657	6.001	6.219	6.157	5.789	5.685	5.855	5.654	5.41	5.565	5.851	6.221	5.904	5.828	6.198	5.375	5.721	5.918	5.66	5.747	5.834
AV590722	9.106	8.229	8.116	6.45	6.554	6.586	7.147	6.421	6.374	6.864	9.076	8.441	8.039	7.372	6.518	6.776	7.274	6.776	6.666	6.96
AV590739	4.667	4.885	4.894	4.473	4.773	4.765	4.718	4.565	5.009	4.802	5.351	4.706	4.684	4.767	4.697	4.615	4.81	5.01	4.952	4.799
AV590856	6.495	6.268	6.446	4.649	5.012	5.208	5.165	4.775	5.145	5.124	6.637	5.961	6.153	5.063	4.647	4.605	5.151	4.936	5.136	5.17
AV590990	14.872	14.462	13.232	11.48	11.979	11.873	12.051	11.797	12.168	12.398	14.72	14.223	13.1	11.597	12.067	11.978	12.163	12.028	12.477	12.783
AV591255	9.275	9.627	9.004	7.73	8.224	8.444	8.512	7.995	8.282	8.343	9.586	9.334	8.794	7.831	8.235	8.284	8.629	8.082	8.474	8.468
AV591585	12.087	12.128	11.734	9.462	9.579	9.94	10.26	9.46	9.844	9.818	12.292	11.845	11.44	10.32	9.277	9.555	9.906	9.447	9.911	9.813
AV591663	10.755	9.894	8.467	5.461	6.442	5.745	5.29	5.354	5.454	5.515	9.965	9.06	8.571	5.588	5.905	5.322	5.47	5.05	5.574	5.272
AV592073	8.744	7.52	6.495	5.764	4.985	5.224	4.988	4.905	5.176	5.356	8.602	6.982	6.24	5.806	4.793	5.112	5.157	4.789	5.203	5.634
AV592301	11.629	12.13	12.805	13.388	12.623	12.788	12.913	12.357	12.382	12.831	11.501	11.982	12.847	13.934	12.443	12.602	13.018	12.403	12.476	12.873
AV592432	10.237	10.814	10.586	10.082	10.325	10.547	10.711	10.074	10.067	10.332	10.496	10.456	10.498	10.996	10.181	10.527	10.533	10.271	10.293	10.592
AV593273	9.68	9.883	9.51	8.463	8.38	9.015	9.13	8.565	8.619	8.915	9.79	9.632	9.689	9.285	8.243	8.741	9.187	8.766	8.85	8.955
AV593964	7.913	7.526	6.992	6.119	7.068	6.696	7.109	6.459	6.883	7.106	6.395	6.493	6.765	6.685	6.541	6.31	6.75	6.363	6.88	6.909
AV594255	9.678	10.298	10.727	11.275	11.884	11.522	11.456	10.756	11.178	12.168	9.763	10.096	10.912	11.021	11.152	11.099	11.387	10.696	11.268	12.424
AV594387	11.098	11.696	12.217	11.423	11.264	11.649	11.635	10.891	11.125	11.936	11.498	11.764	11.871	11.293	11.063	11.293	11.704	11.062	11.365	12.062
AV595776	11.656	11.705	12.13	11.118	11.197	11.475	10.628	10.789	10.827	10.861	11.826	11.516	11.845	11.391	11.17	11.151	10.947	10.939	11.179	10.87
AV595846	14.389	14.683	14.721	12.943	14.687	14.492	14.64	14.419	14.152	14.152	14.756	14.443	14.797	13.453	14.396	14.29	14.501	14.487	14.224	14.244
AV596340	7.24	8.049	7.921	5.296	5.797	5.633	5.555	5.552	5.593	5.587	7.856	8.168	7.632	5.691	5.62	5.494	5.827	5.507	5.592	5.559
AV597068	11.68	11.959	11.625	10.605	11.217	11.609	11.629	11.25	11.332	11.689	12.075	11.924	11.884	11.454	11.44	11.589	11.705	11.388	11.631	11.859
AV598653	8.61	8.632	8.373	8.596	7.635	7.665	7.773	7.357	7.175	7.74	8.689	8.238	8.076	8.166	7.124	7.039	7.662	7.219	7.246	7.414
AV599259	6.655	6.593	6.306	5.504	5.665	6.081	6.028	5.594	6.444	5.898	6.724	6.31	6.145	6.184	5.738	5.961	6.177	5.887	6.649	6.014
AV599638	12.11	12.531	12.405	12.392	11.982	12.005	12.629	11.795	11.848	11.816	12.098	12.243	12.5	12.889	11.924	12.178	12.478	11.898	12.022	12.22
AV600296	9.367	9.076	8.134	5.598	6.14	6.279	6.047	5.825	6.584	7.528	9.631	8.847	7.775	6.521	5.958	5.902	6.296	6.099	6.724	7.46
AV600463	9.626	9.572	9.833	7.834	9.355	9.715	9.505	9.282	9.293	9.124	9.714	9.517	9.8	8.546	9.433	9.628	9.475	9.302	9.447	9.081
AV601804	7.991	5.739	5.303	4.285	4.559	4.372	4.565	4.406	4.555	4.487	7.214	6.001	5.295	4.762	4.301	4.505	4.602	4.861	4.726	4.453
AV602981	10.677	8.162	6.439	6.575	7.68	8.185	7.325	7.762	7.707	8.326	7.456	6.862	6.32	6.537	6.999	7.43	7.182	7.619	7.619	7.879
AV603423	10.416	10.998	10.899	8.877	9.574	9.422	9.259	8.967	8.905	9.232	10.171	10.451	10.993	9.342	9.447	9.175	9.489	9.155	9.204	9.411
AV603493	12.151	12.705	13.283	11.833	13.212	13.813	13.679	13.218	13.033	13.426	12.435	12.825	13.283	12.366	13.151	13.676	13.857	13.511	13.332	13.525
AV604089	8.237	8.402	8.044	7.201	7.125	6.778	7.065	6.501	6.539	7.032	8.289	8.229	8.18	7.651	6.613	6.298	7.155	6.641	6.527	6.905
AV604522	7.817	7.707	7.987	6.782	6.468	5.896	6.963	6.208	6.324	6.685	8.083	7.595	7.722	7.314	5.657	5.061	6.375	6.051	6.338	6.476
AV605050	11.346	11.436	10.992	11.571	11.396	11.754	11.374	11.202	11.295	11.671	11.303	11.033	10.994	12.04	11.292	11.482	11.466	11.419	11.495	11.643
AV607636	8.673	8.932	8.672	7.859	8.914	8.998	9.341	9.002	8.718	9.011	8.654	8.643	8.718	8.655	8.659	8.873	9.333	9.015	8.944	9.079
AV607721	9.244	9.226	8.986	7.475	8.141	8.125	8.639	7.913	8.252	8.489	9.315	9.304	8.78	7.967	7.818	7.998	8.257	7.893	8.103	8.252
AV607906	10.496	10.461	9.45	8.614	9.748	10.305	10.25	9.722	10.004	10.086	10.445	10.245	9.693	9.683	9.729	10.275	10.134	10.102	10.239	10.196
AV608434	10.846	12.439	12.496	14.028	14.135	14.429	14.489	14.171	14.255	14.909	11.793	12.614	12.58	14.251	13.93	14.293	14.306	14.166	14.366	14.778
AV609762	11.705	11.754	11.337	10.571	11.162	11.451	11.369	11.246	10.935	11.425	11.64	11.641	11.375	10.93	11.023	11.268	11.43	11.461	11.178	11.451
AV610091	10.18	10.204	9.856	7.653	7.909	8.089	8.163	7.682	7.607	8.155	10.132	9.912	9.701	8.411	7.545	7.581	8.018	7.732	7.781	8.044
AV611546	6.719	6.749	6.697	6.181	6.054	6.049	5.76	5.572	5.536	5.765	6.928	6.57	6.463	6.446	5.971	5.735	6.074	5.805	5.599	5.862
AV612245	8.618	7.568	6.461	4.932	5.608	5.353	4.867	5.357	5.276	5.355	7.084	6.968	6.312	4.802	5.225	5.294	5.639	5.494	5.581	5.337
AV612448	12.624	12.971	13.213	9.858	11.025	11.444	11.342	10.559	10.434	10.034	12.33	12.908	13.578	10.277	10.961	11.239	11.162	10.366	10.607	9.93
AV613039	5.613	5.65	5.953	6.513	6.978	5.505	6.326	5.999	6.028	6.824	6.02	5.185	7.369	7.466	5.557	4.879	5.333	5.04	5.269	5.586
AV613629	7.594	7.319	6.863	5.781	5.917	6.182	6.058	5.742	6.076	6.439	7.743	7.009	6.576	6.941	5.77	6.208	5.783	5.878	6.234	6.508
AV616108	10.516	10.331	9.336	8.059	8.75	9.013	8.959	9.193	8.918	9.707	10.477	10.024	9.459	8.896	8.459	9.388	8.676	8.315	9.13	9.455
AV616443	9.088	9.153	8.246	6.024	7.278	7.706	7.557	7.099	8.088	7.787	9.84	8.953	8.239	6.558	7.157	7.302	7.405	7.144	7.954	7.746
AV616491	11.861	12.1	12.312	11.906	11.742	11.807	11.505	11.369	11.308	11.528	11.961	11.972	12.082	11.951	11.587	11.552	11.714	11.614	11.698	11.648
AV664173	10.476	10.434	9.622	8.973	9.72	9.832	9.721	9.667	9.45	10.051	10.494	10.053	9.714	9.249	9.335	9.689	9.682	9.455	9.481	9.813
AV664538	6.568	6.119	5.802	4.971	4.892	4.83	4.718	4.466	4.853	5.101	6.671	6.213	5.766	5.04	4.724	4.432	4.841	4.638	5.088	5.227
AV664556	8.684	9.45	8.899	7.995	8.597	8.818	8.755	8.57	8.524	9.324	9.426	9.451	9.058	8.922	7.835	8.179	8.435	8.247	8.277	8.841
AV664629	13.139	12.768	12.077	9.922	9.725	9.456	8.837	8.977	8.82	9.515	12.83	12.572	12.319	10.504	9.718	9.861	9.534	8.89	9.535	9.683
AV665341	11.385	11.546	10.788	9.246	9.908	9.548	10.291	9.392	9.062	8.913	11.123	11.232	11.131	9.981	9.717	9.449	10.077	9.365	9.267	9.02
AV665367	10.665	11.253	10.872	9.16	9.56	9.819	9.216	8.841	9.104	9.566	10.928	10.909	10.971	9.308	9.621	9.535	9.451	9.091	9.515	9.651
AV665645	7.271	7.973	8.083	6.246	6.881	7.021	7.99	6.793	7.046	7.742	7.092	7.562	7.64	6.798	6.612	6.834	7.913	6.805	7.4	7.765
AV665830	6.599	5.811	5.484	4.665	5.436	5.533	5.373	5.379	5.394	5.415	6.338	5.714	5.488	5.092	4.933	5.3	5.389	5.386	5.485	5.529
AV665950	8.577	8.515	7.814	5.91	6.67	6.727	5.866	6.154	6.537	6.512	8.555	8.202	7.897	6.449	6.378	6.364	6.304	6.25	6.883	6.45
AV667162	9.826	9.999	10.158	8.764	9.896	10.308	10.398	9.901	10.032	10.165	10.008	10.213	10.175	9.259	9.905	10.031	10.172	9.928	10.24	10.233
AV667221	12.293	12.827	12.914	14.082	12.859	12.261	12.433	11.964	11.42	12.325	12.764	12.414	12.814	13.703	12.464	12.222	12.308	12.04	11.501	12.422
AVIL	8.544	7.745	6.959	5.301	6.003	5.231	5.503	4.984	5.679	5.683	6.753	7.077	6.972	5.407	5.439	4.975	5.664	5.071	5.424	5.564
AVP	16.091	15.633	16.293	16.279	15.548	15.704	15.482	15.413	15.161	15.791	15.963	15.966	15.991	15.891	15.249	15.336	15.718	15.659	15.583	15.655
AVPI1	10.705	12.514	12.344	13.094	12.892	12.976	12.131	12.474	12.131	12.989	11.199	12.267	12.049	13.073	12.945	12.823	12.332	12.55	12.441	13.209
AVPR1B	5.212	5.507	5.417	5.202	4.9	4.929	4.831	4.667	5.087	5.054	5.681	5.187	5.14	5.661	4.786	4.575	4.923	4.985	5.38	5.089
AVPR2	8.655	8.455	9.213	8.575	8.747	8.874	8.429	8.379	8.39	8.829	8.871	8.242	8.877	8.854	8.579	8.548	8.704	8.582	8.8	8.813
AW289247	7.135	6.44	6.278	4.89	5.636	6.125	5.711	5.473	5.768	6.091	7.05	6.361	5.976	5.172	5.846	5.974	6.026	5.712	6.156	6.093
AW289333	11.354	11.234	11.067	10.311	10.337	10.417	10.55	10.245	10.357	10.74	11.52	11.305	11.065	10.963	10.198	10.37	10.56	10.417	10.522	10.818
AW307682	10.706	10.471	9.702	9.076	9.566	10.199	10.03	9.987	9.624	10.004	10.608	10.174	10.021	9.727	9.096	9.846	10.258	10.093	9.875	10.088
AW307791	9.755	9.022	6.823	6.584	6.313	6.148	6.023	5.812	6	5.562	8.652	8.041	6.875	6.303	6.248	6.244	5.92	6.045	5.94	5.884
AW307950	10.937	11.181	11.357	10.037	10.118	10.18	10.298	9.848	9.748	10.022	11.78	11.386	10.923	10.662	9.913	10.236	9.879	9.967	10.067	10.145
AW311877	7.63	7.401	7.251	6.635	6.495	6.497	6.224	6.022	6.146	6.557	7.572	7.149	7.007	6.986	6.071	6.128	6.454	6.378	6.47	6.475
AW312156	9.854	10.437	10.371	8.687	9.458	9.378	9.801	8.972	8.997	9.196	9.893	9.936	10.044	9.437	9.131	9.049	9.504	9.041	9.321	9.145
AW314002	8.722	8.881	8.23	5.606	6.071	6.031	5.832	5.674	5.724	6.245	8.549	8.188	7.862	6.264	5.773	5.638	6.079	5.908	5.925	6.35
AW314086	9.023	10.334	9.906	14.017	12.872	11.611	10.338	10.996	11.209	12.962	9.245	9.709	9.773	13.141	11.994	12.051	10.065	10.909	11.173	13.317
AW314401	10.353	11.54	10.727	12.649	12.658	11.913	10.989	11.632	12.613	12.13	9.503	10.095	11.132	12.892	12.498	11.565	12.106	11.924	12.941	12.447
AW314577	10.162	9.532	7.665	7.408	9.366	9.835	9.665	9.327	8.958	9.383	10.562	9.332	7.897	8.473	9.301	9.664	10.034	9.856	9.251	9.638
AW314927	8.468	8.093	8.723	7.532	7.857	7.804	7.597	7.54	7.428	7.636	7.444	7.842	9.093	8.132	8.325	7.879	8.251	7.919	8.053	7.937
AW316192	8.124	10.111	11.146	9.661	10.954	11.54	11.607	10.712	10.772	10.585	8.425	10.287	11.051	10.796	11.079	11.441	11.623	10.944	11.067	10.588
AW316405	10.219	9.853	9.23	7.193	8.256	8.211	8.491	7.739	7.809	7.882	9.751	9.199	9.321	7.425	7.959	8.049	8.652	7.792	8.223	8.046
AW325994	4.755	4.752	4.832	4.506	4.76	4.766	4.813	4.771	4.636	4.558	4.984	4.373	4.544	4.736	4.486	4.69	5.046	4.868	4.871	4.979
AW326461	7.668	7.987	7.452	7.706	7.702	7.797	7.206	7.015	7.45	7.594	7.793	7.637	7.585	7.896	7.551	7.235	7.606	7.285	7.826	7.71
AW326670	4.533	4.335	4.751	4.3	4.621	4.698	4.647	4.999	4.738	4.908	4.824	4.581	4.315	4.474	4.379	4.832	4.475	4.807	4.721	4.87
AW326782	6.674	5.907	5.186	4.697	4.797	4.651	4.712	4.519	4.746	4.879	6.518	5.692	5.06	5.018	4.56	4.586	4.667	4.601	4.567	4.856
AW327229	12.331	12.043	11.449	9.51	8.912	8.996	9.243	8.767	9.196	9.244	12.114	11.861	11.67	11.02	9.254	9.37	9.623	9.466	9.825	9.885
AW336105	9.777	7.124	7.243	4.946	5.103	4.906	4.775	4.889	5.201	5.23	9.147	7.384	7.573	4.716	5.139	5.287	5.013	5.229	5.326	5.505
AW336618	7.266	9.784	9.546	7.769	6.682	6.944	6.508	5.931	5.794	6.799	7.771	10.416	9.471	6.588	7.056	6.956	6.907	6.481	6.316	6.738
AW337059	8.92	8.801	8.85	8.736	8.782	8.986	8.805	8.452	8.509	9.19	8.591	8.577	8.504	9.009	8.512	8.651	8.978	8.725	8.766	9.113
AW344369	12.403	12.56	11.909	6.848	9.15	8.966	8.425	9.024	8.997	8.398	12.722	12.343	12.015	7.983	9.423	8.585	9.432	8.935	9.526	8.644
AW344441	7.511	7.484	7.345	5.542	4.993	5.004	4.978	5.046	5.139	5.317	7.42	7.455	7.053	5.434	4.992	5.013	5.069	4.85	5.228	5.358
AW344901	10.075	10.164	9.366	9.331	9.346	9.607	9.458	9.131	8.879	8.92	9.959	9.684	9.543	10.129	9.213	9.483	9.505	9.3	9.215	9.271
AW345566	10.403	10.676	10.245	7.294	8.87	8.57	8.368	8.53	8.723	9.199	10.596	10.622	10.359	8.109	9.108	8.577	8.706	8.899	9.091	9.323
AW345789	13.764	14.101	13.531	10.941	11.741	12.2	12.21	11.498	11.264	11.122	14.114	13.976	13.787	11.656	11.526	12.044	12.446	11.739	11.604	11.277
AW345936	10.182	10.14	9.497	7.581	8.456	8.484	8.674	8.191	7.907	8.187	10.014	9.798	9.775	8.243	8.231	8.2	8.791	8.096	8.229	8.218
AW346117	8.358	6.876	6.451	5.227	4.994	4.958	4.802	4.747	4.946	5.058	8.298	6.989	6.045	5.342	4.69	4.596	4.875	4.714	4.908	5.078
AW346243	9.49	9.22	8.768	6.687	7.436	7.399	7.151	6.779	6.921	7.439	9.675	9.145	8.355	7.321	7.165	7.013	7.149	6.979	7.097	7.339
AW346345	9.253	8.506	8.07	6.636	7.64	7.638	7.478	7.089	7.274	7.4	9.932	8.074	7.535	6.94	7.402	7.304	7.27	7.199	7.483	7.818
AW353526	6.408	6.256	6.312	6.289	6.061	6.023	5.741	5.696	5.722	6.016	6.324	5.886	5.844	6.461	5.584	5.59	5.946	5.909	5.969	5.864
AW354518	6.495	7.05	6.883	6.065	6.338	6.385	6.49	6.356	6.497	6.625	6.461	6.739	6.532	6.678	6.206	6.377	6.809	6.526	6.735	6.798
AW357024	6.139	6.228	6.302	6.019	5.796	5.97	5.686	5.661	5.859	5.962	6.397	5.901	6.039	6.395	5.58	5.758	5.918	5.775	5.942	5.96
AW357409	10.944	10.57	9.62	8.567	9.356	9.826	9.564	9.18	9.419	9.734	10.939	10.545	9.856	9.77	9.459	9.643	9.572	9.456	9.695	9.864
AW357744	10.371	9.451	8.959	7.056	7.581	7.262	7.367	7.124	7.254	7.152	10.569	9.831	9.139	7.676	7.417	7.066	7.579	7.097	7.491	7.204
AW358978	10.664	10.072	9.796	9.037	9.33	9.243	9.577	9.109	9.093	9.425	10.264	10.029	9.689	9.361	8.957	9.035	9.539	9.325	9.267	9.388
AW417009	6.332	6.516	7.134	5.982	6.247	6.742	6.216	5.93	6.148	6.906	6.323	6.77	6.874	5.929	5.981	6.335	6.238	6.229	6.608	7.025
AW417127	9.126	8.256	7.094	5.228	6.565	6.49	6.082	5.84	5.713	6.139	8.426	7.573	7.122	6.373	5.908	6.352	6.531	5.891	6.127	6.381
AW418140	10.664	11.352	11.254	9.934	11.236	10.95	10.746	10.424	10.405	10.943	10.597	10.982	10.962	10.498	10.925	10.545	10.865	10.761	10.571	11.016
AW418357	13.058	12.921	12.414	11.814	12.638	12.563	12.756	12.423	12.454	12.84	12.954	12.65	12.32	12.294	12.438	12.389	12.726	12.437	12.611	12.774
AW425419	10.291	10.305	9.901	8.921	9.501	9.944	9.629	9.636	9.344	9.652	10.112	9.938	10.039	9.878	9.4	9.759	9.721	9.764	9.563	9.704
AW425500	8.392	8.119	7.63	7.674	7.83	7.241	7.877	7.044	7.435	7.517	8.531	7.846	7.55	8.076	7.646	6.891	7.878	7.382	7.625	7.739
AW426150	9.979	10.042	9.534	9.029	9.109	9.472	9.54	9.392	9.226	9.5	9.882	9.735	9.732	9.448	8.877	9.513	9.529	9.558	9.495	9.74
AW426882	6.473	6.205	6.477	5.037	5.286	5.771	4.784	4.97	5.441	5.513	6.497	5.852	6.439	5.355	4.993	5.08	5.046	4.8	5.288	5.531
AW427557	11.708	12.634	11.846	10.402	11.307	11.742	11.59	11.361	11.261	11.557	11.829	12.188	12.171	11.352	11.289	11.616	11.79	11.416	11.866	11.752
AW427787	10.995	10.614	9.337	5.605	4.994	5.372	5.403	4.726	5.015	4.907	11.328	10.57	8.157	5.006	4.598	4.758	4.873	4.994	5.034	4.766
AW428111	8.139	8.101	7.723	6.001	7.074	6.046	7.23	6.162	6.214	6.075	8.714	8.212	8.357	7.196	6.69	5.997	7.747	6.708	6.558	6.54
AW428392	11.689	12.186	11.647	10.032	10.345	10.262	10.236	9.843	9.988	10.407	11.86	11.799	11.439	10.51	10.22	9.985	10.306	9.973	10.265	10.326
AW428578	5.888	5.916	5.832	6.163	6.166	6	6.079	5.496	5.765	5.894	5.928	5.569	5.772	6.547	5.954	5.724	6.056	5.86	5.917	5.985
AW428595	11.28	12.049	10.993	8.978	9.48	10.006	10.199	9.454	9.918	9.864	11.313	11.589	11.216	9.727	9.675	9.977	10.357	9.544	10.297	10.05
AW429449	11.113	11.003	9.557	7.827	8.779	8.808	8.207	8.372	8.238	8.645	11.17	10.685	10.148	8.818	8.854	8.451	8.857	8.51	8.906	8.934
AW430182	9.782	9.93	9.533	8.079	8.844	9.054	8.998	8.655	8.899	9.184	9.99	9.9	9.529	8.898	8.74	8.996	9.173	8.623	9.068	9.195
AW430245	9.102	8.94	8.645	7.472	8.552	8.461	8.958	8.658	8.638	8.769	8.89	8.969	8.516	8.266	8.367	8.496	8.837	8.64	8.573	8.743
AW431709	11.157	9.992	11.102	6.618	8.203	7.964	7.614	7.827	7.758	7.312	11.319	11.096	11.125	7.471	8.275	7.75	8.061	7.876	8.015	6.993
AW431791	5.168	7.577	8.617	9.038	10.507	10.701	10.319	11.083	10.797	12.266	5.397	6.909	8.462	9.859	9.651	10.646	10.3	11.102	11.075	12.578
AW431923	8.077	7.78	7.553	7.051	6.625	6.659	6.354	6.189	6.375	6.773	7.942	7.754	7.418	7.346	6.551	6.454	6.63	6.43	6.572	6.852
AW431974	12.51	13.246	12.463	11.396	11.065	11.298	11.362	10.704	10.76	11.085	12.7	12.735	12.64	12.036	10.815	11.082	11.454	10.811	11.101	11.334
AW435574	9.506	10.098	8.832	8.016	8.082	8.588	8.57	8.276	8.488	9.162	9.371	8.881	8.65	8.109	8.009	8.331	9.313	8.733	9.138	9.655
AW437582	7.861	7.81	7.388	6.567	7.278	6.964	6.652	6.638	6.951	7.207	7.76	7.409	7.278	7.265	7.014	7.067	6.959	6.835	7.086	7.613
AW446096	8.028	8.451	7.181	5.66	6.35	6.536	6.413	6.06	6.412	6.813	7.93	7.884	7.558	6.619	6.409	6.469	6.532	6.357	6.811	7.124
AW447201	5.508	5.392	5.51	4.869	4.812	5.021	4.853	4.756	5.156	5.104	5.583	5.216	5.302	5.319	4.776	4.552	5.239	4.886	4.758	5.084
AW447316	9.888	10.06	10.137	9.629	10.613	11.036	11.039	10.765	10.383	10.765	9.985	10.092	9.915	9.874	10.367	10.821	10.977	10.697	10.398	10.652
AW447771	6.389	5.763	5.609	5.107	4.674	4.66	4.802	4.617	4.842	4.861	6.243	5.08	5.22	5.667	4.579	4.538	4.934	4.759	4.608	4.975
AW461467	8.49	8.709	9.293	8.161	8.294	8.143	7.989	7.636	7.634	7.631	8.854	8.642	8.96	8.477	8.113	7.788	8.106	7.762	7.83	7.614
AW461648	8.569	7.604	6.191	4.815	5.556	5.028	4.735	5.008	4.893	5.056	8.676	8.394	6.699	5.554	4.939	4.787	4.968	4.99	5.108	4.884
AW462963	6.583	6.59	6.716	5.732	6.666	6.555	6.652	5.965	6.611	6.713	7.085	6.807	6.324	6.68	6.597	6.463	6.371	6.175	6.669	6.785
AW463026	7.187	7.857	7.299	7.091	7.703	7.172	6.894	6.55	6.555	7.441	7.445	7.337	6.978	7.199	7.194	6.828	6.769	6.788	6.855	7.537
AW464079	10.568	10.818	10.944	10.899	11.446	11.947	11.638	11.673	11.63	11.856	10.866	10.915	10.801	11.025	11.181	11.571	11.704	11.69	11.748	11.852
AW464157	12.591	12.524	12.055	11.207	11.941	12.127	12.192	11.622	11.435	11.877	12.648	12.388	12.051	11.822	11.617	11.922	12.203	11.8	11.77	11.927
AW464703	14.644	14.96	14.618	14.011	13.996	14.179	14.3	14.005	14.017	14.418	14.856	14.746	14.593	14.51	13.8	14.119	14.355	14.27	14.275	14.48
AW464731	11.754	11.794	11.784	11.184	10.621	10.212	9.202	8.972	8.765	9.323	11.858	11.641	11.522	10.973	10.917	10.22	9.548	8.967	9.013	9.519
AW464791	4.906	4.537	4.378	5.102	5.894	5.673	4.691	5.067	4.775	5.397	4.213	4.448	4.252	5.043	5.552	5.081	5.024	5.032	4.852	5.486
AW465881	5.641	5.984	5.825	5.237	5.276	5.063	4.904	4.901	5.023	5.437	5.987	5.434	5.444	5.674	5.043	4.792	5.011	5.042	5.041	5.175
AW466030	11.444	12.662	12.668	12.575	12.365	11.892	11.303	11.72	11.326	11.242	11.698	12.05	12.795	12.462	12.97	11.668	11.823	12.324	11.717	12.235
AW477655	9.397	8.893	8.955	8.753	10.154	10.62	10.676	10.048	10.545	10.576	8.231	8.088	8.928	9.134	9.926	10.133	10.807	10.224	10.641	10.446
AW477757	8.914	7.787	7.043	4.937	5.2	5.216	5.308	5.055	5.121	5.38	8.35	7.697	7.011	5.793	5.008	5.19	5.217	4.919	5.241	5.409
AW478888	9.482	9.449	10.543	9.477	8.84	9.378	8.817	9.095	8.845	8.949	9.705	9.193	10.014	9.808	8.675	9.045	8.979	9.027	9.079	8.93
AW479006	12.045	10.952	10.088	7.948	8.121	7.836	7.732	7.516	7.748	7.69	11.632	10.474	9.98	8.163	8.111	7.691	7.871	7.54	8.018	7.784
AW479048	5.265	5.551	5.526	5.311	5.352	5.38	5.458	5.062	5.566	5.362	5.441	5.458	5.392	5.482	4.942	5.291	5.488	5.077	5.73	5.454
AW479433	10.906	10.15	8.999	4.882	6.027	6.186	5.944	5.746	5.691	5.673	10.544	10.109	9.329	5.872	6.144	5.989	5.87	5.607	5.932	5.442
AW479570	8.207	8.661	9.058	9.373	8.779	8.891	9.083	8.615	9.298	9.271	8.357	8.678	8.945	9.681	8.799	8.89	9.599	9.044	9.675	9.61
AW479717	9.702	10.119	8.957	8.093	8.814	8.298	8.322	8.492	8.732	9.073	9.836	9.779	9.173	8.149	8.231	7.849	8.184	8.558	8.717	9.001
AW480864	7.471	5.759	4.915	8.974	5.771	6.174	5.24	5.462	5.457	7.292	5.406	4.727	4.671	8.343	5.196	5.746	5.869	5.396	5.797	7.039
AW481565	8.786	8.696	8.58	7.611	7.338	7.23	7.048	6.96	6.969	7.734	8.749	8.403	8.495	7.814	6.922	6.812	7.423	7.213	7.142	7.666
AW483036	11.901	11.728	10.93	11.807	10.457	10.222	10.56	9.964	10.308	10.653	11.942	11.345	10.977	12.214	10.232	10.084	10.394	10.342	10.61	10.9
AW483508	9.354	9.678	9.702	10.572	10.856	11.273	11.92	10.909	11.015	11.448	8.825	9.577	9.087	11.178	9.779	10.63	11.014	10.909	11.032	10.773
AW483578	8.604	8.783	9.274	9.036	8.323	8.411	8.173	8.015	8.108	8.335	8.817	8.721	8.981	8.901	8.068	8.069	8.361	8.219	8.393	8.251
AW483622	9.691	10.138	10.072	11.456	11.133	11.45	11.962	11.646	11.643	12.399	9.712	9.85	9.865	12.201	11.196	11.25	12.21	12.29	12.075	12.663
AW483774	7.366	7.629	7.58	7.441	7.025	7.457	7.52	7.36	7.355	7.786	7.68	7.13	7.608	7.753	6.845	7.275	7.275	7.449	7.484	7.988
AW484572	11.165	11.802	11.245	10.61	10.479	10.536	10.69	10.227	10.578	11.065	11.446	11.347	11.312	11.217	10.548	10.649	10.635	10.473	10.95	11.503
AW484921	8.697	8.466	8.423	7.853	8.479	8.427	8.542	7.927	7.618	8.175	8.015	8.332	8.468	7.885	8.413	8.054	8.58	8.119	8.092	8.17
AW485296	7.083	7.211	6.782	6.064	6.525	6.735	6.142	5.683	5.981	6.14	7.317	6.971	6.587	6.515	6.176	6.097	6.338	6.047	5.996	6.221
AW487183	7.09	5.621	4.875	4.682	4.993	4.703	4.569	4.855	4.638	4.896	5.439	4.57	4.714	5.234	4.743	4.765	4.672	4.911	5.084	4.756
AW487431	4.211	4.824	4.479	4.505	4.661	4.775	4.482	4.635	4.733	4.869	4.925	4.231	4.43	4.873	4.402	4.75	4.711	5.169	4.768	4.856
AW487759	5.821	5.636	5.156	5.005	4.848	4.892	4.759	4.699	5.114	5.334	5.861	5.791	5.341	4.905	4.669	4.666	4.933	4.996	5.153	5.291
AW631967	8.932	8.464	8.183	6.957	7.927	8.578	8.251	8.222	8.021	8.454	8.5	8.639	8.335	7.68	7.898	8.524	8.266	8.301	8.311	8.515
AW632194	8.896	7.878	7.52	6.436	7.808	8.491	8.249	7.749	7.67	8.075	8.53	7.4	7.436	7.037	7.814	8.558	8.553	8.111	8.279	8.268
AW632666	5.798	6.544	7.101	6.71	7.135	7.106	6.711	6.47	6.487	6.925	6.259	6.441	6.998	6.969	6.915	6.792	6.971	6.641	6.695	6.831
AW652254	10.433	10.313	9.553	9.639	9.345	9.422	9.5	9.165	9.341	9.698	10.238	10.059	9.641	10.354	9.253	9.315	9.541	9.353	9.704	9.868
AW652626	10.031	10.365	10.295	9.048	9.567	9.507	9.88	8.779	9.285	9.485	10.166	10.201	9.957	9.438	9.341	8.827	9.734	8.859	9.517	9.265
AW652877	10.67	10.879	10.023	8.596	9.172	8.769	9.276	8.412	8.845	8.489	10.628	10.665	10.338	8.981	9.109	8.682	9.379	8.52	9.108	8.877
AW653012	10.327	10.473	10.386	9.216	10.751	10.757	10.718	10.338	10.368	10.509	10.086	10.586	10.501	10.03	10.648	10.577	10.92	10.391	10.593	10.464
AW653591	8.884	8.037	7.077	6.339	6.55	6.095	6.579	5.951	6.35	6.474	8.24	7.579	6.979	6.392	6.106	5.63	6.532	6.102	6.451	6.392
AW654206	12.456	12.213	12.025	10.812	11.924	12.461	12.39	12.03	11.938	12.002	12.154	11.766	11.882	11.215	11.851	12.548	12.659	12.394	12.26	12.177
AW654419	8.095	7.514	6.449	6.003	5.131	5.65	5.501	5.032	5.246	5.327	7.596	6.992	6.269	5.523	4.912	5.288	5.461	5.23	5.14	5.665
AW654540	9.787	11.49	12.305	9.963	11.482	11.615	11.463	11.242	11.36	11.091	9.75	11.64	12.044	10.477	11.438	11.167	12.084	11.493	11.743	11.112
AW655270	9.814	9.942	9.806	9.637	9.232	9.938	9.476	9.774	9.43	10.159	9.819	9.974	9.978	9.543	9.119	9.814	9.438	9.798	9.625	10.255
AW655354	10.413	10.879	10.982	12.043	13.012	13.213	13.401	13.077	12.744	13.033	10.454	10.599	10.913	12.113	12.679	13.015	13.459	13.028	12.829	13.152
AW655471	13.35	13.159	12.58	9.636	11.289	11.432	10.954	10.895	10.994	10.958	13.263	12.835	12.804	11.045	11.275	11.283	11.146	10.826	11.403	11.039
AW655669	9.603	9.166	8.404	7.071	7.828	8.038	7.718	7.296	7.085	7.37	9.84	8.66	8.441	7.832	7.771	7.842	8.034	7.392	7.453	7.539
AW655687	11.553	12.016	11.443	10.557	12.532	13.532	13.444	13.182	12.782	13.204	11.772	11.863	11.883	11.61	12.166	13.327	13.593	13.244	13.052	13.186
AW655713	12.323	12.929	12.3	10.982	11.064	11.427	11.211	10.501	10.686	11.249	12.901	12.267	11.732	10.902	10.9	11.004	10.863	10.593	10.951	11.164
AW655806	5.287	5.187	5.242	4.95	4.904	4.886	4.938	4.808	4.854	4.986	5.459	4.999	5.146	5.382	4.735	4.643	5.044	4.851	4.959	5.036
AW656401	11.063	10.495	10.259	7.557	9.135	9.715	9.44	8.817	8.337	7.316	11.141	10.524	10.134	9.165	9.239	9.049	9.69	8.725	8.153	7.341
AW656790	10.459	10.24	10.351	9.058	9.826	9.859	10.246	9.865	9.929	9.93	9.872	10.138	10.389	10.058	10.107	10.262	10.584	10.294	10.266	10.26
AW657282	7.357	6.951	5.928	5.086	7.024	7.383	6.59	6.845	7.932	7.227	7.151	7.439	6.508	5.46	7.059	7.17	6.411	7.191	7.929	7.231
AW657670	8.437	5.487	5.392	4.855	4.824	4.637	4.958	4.427	5.215	5.205	5.283	4.731	5.215	5.142	4.309	4.582	4.468	4.711	5.16	5.309
AW658075	12.27	12.275	11.453	10.036	10.688	11.435	11.179	11.344	11.503	12.064	12.383	11.726	11.342	10.418	10.396	11.077	11.416	11.592	11.656	12.002
AW658095	9.32	10.245	10.352	10.224	10.705	11.428	10.762	11.001	11.081	11.418	9.812	9.976	10.441	10.653	10.514	11.245	11.205	11.247	11.264	11.491
AW659965	6.789	7.152	7.46	6.697	8.886	8.556	7.971	7.669	8.051	7.921	6.653	6.4	7.454	7.478	8.969	8.88	7.898	8.643	8.708	8.605
AW660062	9.139	9.295	9.25	9.587	9.426	9.88	9.388	9.313	9.486	10.213	8.997	9.11	9.165	10.102	9.541	9.726	9.782	9.811	9.907	10.315
AW660066	11.596	11.507	12.41	12.119	12.819	13.126	12.292	12.138	12.074	12.255	11.865	11.445	12.112	12.285	12.609	12.603	12.502	12.194	12.354	12.047
AW660511	6.458	5.869	5.811	5.498	5.487	5.499	5.146	5.275	5.421	5.454	5.642	5.347	5.479	5.987	5.173	5.123	5.395	5.35	5.648	5.589
AW660670	10.377	10.522	9.94	8.786	10.088	10.104	10.296	9.862	10.089	10.171	10.603	10.286	10.021	9.449	9.932	9.921	10.325	9.805	10.228	10.203
AW660787	12.424	12.849	12.125	13.924	12.628	12.757	13.051	12.198	12.616	13.195	12.612	12.535	12.005	13.872	12.763	12.757	13.013	12.819	12.678	13.637
AW668970	13.012	13.196	12.789	12.425	12.424	12.911	12.738	12.48	12.437	12.849	13.216	12.838	12.739	12.987	12.198	12.721	12.663	12.404	12.574	12.816
AW669309	10.169	10.284	10.348	7.977	9.035	9.879	9.636	8.992	9.11	9.547	10.259	10.065	10.066	8.88	8.859	9.489	9.757	9.144	9.38	9.426
AW669709	7.752	7.673	7.34	5.956	6.39	6.301	6.682	6.241	6.117	6.265	7.602	7.544	7.517	6.16	5.86	6.03	6.471	6.207	6.013	6.435
AW669976	12.563	10.436	8.014	6.655	7.315	7.388	7.452	6.954	7.475	6.808	11.592	9.369	8.468	6.847	7.399	7.568	7.529	7.338	7.579	7.349
AW669983	12.747	13.062	12.83	12.673	12.398	12.931	12.538	12.133	11.991	12.656	13.013	12.875	12.926	13.218	12.157	12.75	12.746	12.447	12.326	12.646
AW670011	10.729	8.155	6.799	4.805	4.72	5.05	5.737	5.159	5.138	5.28	9.894	8.411	7.073	5.66	4.585	5.243	6.073	5.207	5.254	5.433
AW670522	12.034	12.34	11.873	10.315	10.655	10.901	10.872	10.407	10.737	10.822	12.101	12.179	11.998	10.865	10.609	10.702	10.815	10.67	10.939	10.968
AXIN1	9.336	9.664	9.66	9.741	10.281	10.733	10.286	10.007	9.955	10.441	9.521	9.56	9.532	10.047	10.07	10.462	10.334	10.148	10.155	10.405
AXIN2	6.152	5.741	6.155	5.47	5.535	5.859	5.922	5.621	5.682	5.517	6.034	5.692	6.075	5.49	5.769	5.757	5.969	5.502	5.744	5.612
AXL	8.913	8.692	8.183	7.257	8.203	8.026	7.631	7.567	7.598	8.222	8.998	8.536	8.414	7.946	8.005	7.722	7.827	7.48	7.8	8.236
AXUD1	9.042	10.207	9.874	13.029	11.035	10.732	9.824	9.852	9.684	10.634	9.246	9.619	10.081	11.849	12.06	11.383	10.87	10.814	10.312	11.045
AY135400	4.293	4.846	4.372	4.024	4.724	4.858	4.715	4.929	4.965	4.576	4.483	4.326	5.061	4.553	4.742	4.838	5.278	4.977	5.442	4.86
AY221098	4.63	4.515	4.393	4.405	4.551	4.957	5.444	4.952	5.735	4.729	4.539	4.532	4.39	4.981	5.109	4.662	4.925	5.1	6.002	4.795
AZI1	12.926	13.422	13.271	11.199	11.256	11.299	11.509	10.976	10.994	11.552	13.163	13.047	12.839	11.628	11.006	11.233	11.604	11.112	11.257	11.716
AZI2	7.11	6.685	7.037	5.822	6.314	5.904	6.358	6.187	5.898	6.027	6.41	6.72	6.426	7.157	6.152	5.991	6.124	6.149	5.958	6.207
A_73_105918	5.574	5.845	6.1	5.925	5.947	5.944	5.596	5.501	5.715	5.837	5.959	5.507	5.812	6.328	5.811	5.631	5.74	5.808	5.793	5.849
A_73_106840	5.915	5.142	5.3	5.384	5.357	4.883	4.574	4.635	4.953	5.02	6.243	5.087	4.921	5.777	5.033	4.652	4.86	4.773	4.911	4.925
A_73_107309	5.164	4.594	4.492	4.607	5.233	4.63	4.599	4.445	4.695	4.74	5.099	4.19	4.484	4.652	4.761	4.754	4.94	4.572	4.666	4.801
A_73_110134	4.431	4.706	5.07	4.46	4.633	4.565	4.423	4.482	4.402	4.417	4.943	4.586	5.068	4.765	4.228	4.425	4.594	4.742	4.662	4.372
A_73_115637	4.155	4.877	4.483	4.824	4.61	4.66	4.757	4.581	4.513	4.534	4.211	4.082	4.154	4.521	4.31	4.948	4.621	4.708	4.505	4.625
A_73_118795	6.198	6.476	6.919	6.159	5.874	5.798	5.645	5.629	5.713	5.892	6.55	6.335	6.483	6.566	5.605	5.543	5.79	5.807	5.765	5.822
A_73_120046	6.851	6.85	6.884	6.492	6.341	6.323	6.174	5.918	6.145	6.098	7.029	6.664	6.701	6.811	6.144	5.964	6.247	6.145	6.172	6.225
ApoN	4.93	4.602	4.841	4.806	4.955	4.774	4.701	4.882	4.782	4.817	5.094	4.608	4.651	4.856	4.619	4.641	4.997	5.112	4.786	5.084
B2M	12.728	14.13	13.921	14.086	15.402	15.55	15.333	15.193	15.324	15.635	12.572	13.611	14.025	14.575	15.296	15.528	15.484	15.552	15.628	15.654
B3GALT1	10.267	9.091	9.403	5.232	5.514	6.48	7.854	6.706	7.31	7.215	10.039	9.331	9.016	5.277	5.398	6.69	7.512	6.517	8.013	7.452
B3GALT2	10.114	9.223	8.565	6.339	6.313	6.406	6.148	5.813	6.066	6.326	10.099	9.713	8.696	6.726	6.364	6.117	6.981	6.169	6.305	7.098
B3GALT4	11.023	11.341	11.357	10.579	11.636	11.96	11.891	11.237	11.583	11.584	11.284	11.244	11.4	11.364	11.454	11.567	11.846	11.464	11.879	11.544
B3GALT6	6.66	6.67	6.704	6.979	6.788	7.314	6.99	6.602	6.815	7.07	6.805	6.605	6.689	7.556	6.613	7.015	6.838	6.795	7.072	7.057
B3GALT7	6.664	6.521	6.89	6.914	6.659	6.803	6.546	6.143	6.597	6.919	6.154	5.703	6.424	7.152	6.491	6.51	6.757	6.266	7.103	7.052
B3GAT1	7.554	7.804	7.552	8.002	8.766	8.414	7.929	7.608	7.958	8.118	7.379	6.979	7.309	7.937	8.173	7.52	7.973	7.58	7.868	7.987
B3GAT3	11.286	11.561	11.499	11.684	11.84	12.213	11.584	11.41	11.518	11.899	11.353	11.339	11.402	11.939	11.777	11.879	11.67	11.603	11.88	11.849
B3GNT1	7.773	7.894	7.264	6.477	7.057	7.024	6.57	6.602	6.812	7.095	8.006	7.515	7.408	6.659	7.12	6.914	6.761	6.821	7.254	7.209
B3GNT4	5.576	6.389	5.152	4.702	4.188	4.334	4.267	4.294	4.294	4.493	6.964	6.849	5.2	4.659	4.861	4.351	5.097	4.773	4.284	4.578
B3GNT6	12.209	12.205	11.644	9.142	10.827	11.535	11.384	11.007	11.172	11.859	11.928	11.792	11.838	10.629	10.805	11.461	11.315	11.124	11.509	11.909
B3GNT7	10.96	11.138	11.503	11.272	10.4	10.903	10.716	10.289	10.37	10.79	11.087	11.195	11.421	11.65	10.396	10.624	10.752	10.644	10.852	11.083
B4GALT1	9.903	10.191	10.063	9.119	9.183	9.255	9.224	8.772	9.06	9.27	10.333	9.81	9.974	9.766	8.875	9.063	9.314	8.924	9.291	9.289
B4GALT2	10.658	10.465	10.4	8.737	9.512	9.905	9.51	9.24	9.373	9.726	10.671	10.447	10.23	8.995	9.341	9.452	9.656	9.354	9.588	9.656
B4GALT3	10.893	10.822	10.039	8.577	9.429	9.323	9.273	8.892	8.943	9.264	11.009	10.291	10.144	9.228	9.171	9.102	9.373	9.074	9.223	9.381
B4GALT4	8.45	8.451	7.425	6.048	6.525	6.496	6.253	6.435	6.255	6.285	8.549	8.66	7.812	6.017	6.521	6.183	6.451	6.674	6.313	6.297
B4GALT5	9.097	9.125	9.264	8.853	9.035	8.861	8.845	8.451	8.402	8.618	9.171	8.884	9.146	9.226	8.892	8.644	9.021	8.83	8.683	8.71
B4GALT6	5.641	5.659	5.411	4.761	4.548	4.854	4.556	4.527	4.606	4.729	5.648	5.484	5.158	4.991	4.562	4.82	4.721	4.619	4.401	4.681
B4GALT7	12.596	12.701	12.115	10.834	10.976	11.336	11.096	10.769	10.786	11.199	12.951	12.469	12.228	11.79	11.122	11.326	11.069	11.092	11.143	11.377
BAALC	7.906	6.321	5.871	4.706	5.182	5.479	4.951	5.194	5.263	5.082	7.664	6.006	5.995	5.441	4.968	4.908	5.492	5.025	5.31	5.168
BAAT	8.949	8.836	8.434	8.267	7.98	7.634	7.505	7.271	7.297	7.547	8.944	8.893	8.437	7.787	7.756	7.619	7.468	7.542	7.487	7.604
BACE1	8.552	8.33	7.986	7.028	7.882	8.07	7.745	7.712	7.785	8.201	8.408	7.943	8.093	7.645	7.596	7.822	8.047	7.802	7.99	8.163
BACE2	10.707	10.324	9.402	7.736	8.512	8.549	7.979	8.055	8.056	8.297	10.79	10.058	9.781	8.097	8.418	8.348	8.347	8.157	8.404	8.386
BACH1	5.898	6.273	5.859	5.909	5.744	6.102	5.694	5.454	5.552	5.838	6.229	6.082	5.76	5.983	5.641	5.735	5.856	5.793	5.697	5.955
BACH2	10.279	9.536	9.458	8.467	9.928	8.185	8.131	7.867	7.349	7.66	9.999	9.477	9.317	7.196	9.139	7.934	8.022	8.078	7.291	7.44
BAD	12.421	12.696	11.927	10.734	11.261	11.355	11.486	10.918	11.362	11.732	12.582	12.264	11.948	11.265	11.157	11.203	11.43	10.981	11.559	11.733
BAG1	5.834	5.805	5.751	5.381	5.881	6.17	5.743	5.592	5.717	5.764	5.829	5.57	5.633	5.861	5.699	5.715	5.93	5.698	5.916	5.734
BAG2	12.817	12.588	12.549	12.829	12.329	12.444	12.649	12.268	11.994	12.523	13.025	12.892	12.733	13.022	12.097	12.291	12.585	12.432	12.178	12.786
BAG3	11.003	12.546	13.033	14.527	14.719	14.749	14.429	14.277	14.424	14.584	11.315	12.528	13.055	15.34	14.686	14.481	14.487	14.838	14.713	15.055
BAG4	6.575	6.422	6.384	5.629	5.864	6.133	6.073	5.509	5.806	5.886	6.412	6.383	6.1	6.024	5.816	6.01	5.968	5.844	6.024	6.013
BAHD1	10.724	11.347	10.503	10.151	9.379	9.444	9.47	9.264	9.125	10.319	11.081	11.066	10.529	9.952	9.281	9.565	9.705	9.544	9.49	10.452
BAI1	8.483	7.972	10.281	9.251	8.593	7.749	7.637	6.73	7.062	7.691	7.664	7.435	10.136	9.305	8.129	7.151	7.593	7.003	7.009	7.51
BAI2	8.954	7.655	5.912	4.694	5.143	5.342	5.394	4.646	5.207	5.272	8.927	7.191	5.851	4.938	5.084	5.123	5.685	4.973	5.452	5.25
BAIAP2	10.247	10.97	10.814	12.411	10.065	10.234	10.077	9.647	9.897	10.174	10.356	10.306	10.33	11.892	9.886	9.723	10.168	9.759	10.172	10.214
BAIAP2L2	10.386	9.899	10.739	10.589	10.017	9.546	9.67	9.383	9.389	9.468	10.356	10.113	10.614	10.257	9.762	9.371	9.795	9.505	9.741	9.474
BAK1	9.826	10.466	10.303	9.534	9.978	10.255	9.449	9.364	9.639	10.091	10.233	10.131	10.153	10.093	9.864	9.997	9.588	9.658	9.943	10.022
BANF1	13.489	14.191	14.532	14.112	14.57	15.116	14.725	14.329	14.447	14.761	13.741	13.749	14.03	14.297	14.396	14.731	14.633	14.34	14.59	14.651
BANP	12.421	13.074	12.237	11.549	12.228	12.252	11.817	11.619	10.403	11.089	12.46	12.696	12.467	11.967	11.654	11.084	12.587	11.627	10.909	10.831
BARHL1	10.296	9.982	9.392	8.833	9.14	9.292	9.206	9.366	8.678	8.992	9.333	9.492	9.046	9.606	9.647	9.466	9.258	9.004	8.96	9.109
BARX1	4.335	4.533	4.44	4.342	4.445	4.893	4.524	4.734	4.793	5.158	4.396	4.172	4.337	4.762	4.281	4.373	4.65	5	5.007	5.493
BASP1	14.352	12.673	10.469	7.681	7.757	8.014	7.677	8.055	8.335	8.542	13.262	12.271	11.103	8.043	7.919	8.404	8.122	8.394	8.686	8.79
BAT1	8.337	8.579	8.671	7.834	8.22	8.454	8.134	7.849	8.244	8.397	8.633	8.364	8.185	8.268	8.073	8.057	8.225	8.15	8.511	8.328
BAT2	9.65	9.427	9.704	8.762	9.374	9.794	9.069	8.68	8.882	9.494	9.629	9.324	9.361	9.409	9.458	9.096	9.259	9.106	9.437	9.213
BAT3	9.02	9.19	9.58	9.627	9.989	10.518	10.005	9.634	9.838	10.38	9.162	9.124	9.329	9.842	9.873	10.004	10.235	9.97	10.291	10.392
BAT4	12.503	12.844	12.417	12.225	12.361	12.627	12.371	11.923	12.06	12.646	12.479	12.426	12.448	12.743	12.227	12.414	12.508	12.273	12.359	12.765
BAT5	11.338	12.008	11.468	10.173	10.903	11.085	10.925	10.433	10.719	11.115	11.557	11.494	11.348	10.825	10.629	10.822	11.011	10.447	10.895	11.162
BATF	4.792	5.514	4.882	4.329	4.465	4.616	4.467	4.745	5.111	4.944	5.079	4.89	4.786	4.527	4.377	4.454	5.007	4.576	4.907	5.076
BAX	9.105	9.247	8.6	7.715	7.962	7.632	7.496	7.107	7.244	7.614	9.269	9.366	8.506	8.023	7.751	7.46	8.012	7.352	7.813	7.643
BAZ1A	11.009	10.245	9.594	10.386	9.716	9.219	9.53	8.949	9.222	9.498	11.228	10.198	9.481	10.499	9.613	9.139	9.66	9.498	9.372	9.704
BAZ1B	12.014	12.324	11.926	10.686	11.194	11.498	11.287	10.875	10.661	11.111	12.121	11.954	11.959	11.338	10.769	11.022	11.442	11.098	11.021	11.082
BAZ2A	10.28	10.092	9.504	8.891	8.726	8.884	8.601	8.138	8.198	8.67	10.252	9.948	9.756	9.07	8.717	8.823	8.871	8.44	8.678	8.944
BAZ2B	9.077	8.996	8.789	7.123	7.281	7.246	7.629	7.256	7.301	7.564	9.101	8.809	8.46	7.379	7.076	7.057	7.724	7.228	7.449	7.484
BBS1	5.168	4.872	5.006	4.653	4.639	4.557	4.402	4.793	4.854	4.804	5.289	4.964	4.698	4.781	4.382	4.469	4.488	4.727	4.817	4.914
BBS2	12.148	12.221	11.34	9.182	9.864	10.006	10.404	9.95	10.315	10.635	11.99	11.622	11.431	10.201	9.976	10.138	10.656	10.436	10.872	10.99
BBS4	7.774	7.799	7.285	6.605	7.228	7.261	7.276	7.244	6.972	7.494	7.87	7.528	7.512	7.039	7.543	7.176	8.045	7.465	7.546	7.631
BBS5	8.381	8.512	8.018	7.535	7.191	7.111	7.444	7.027	7.301	8.076	8.439	8.576	8.18	7.77	7.044	7.295	7.162	7.185	7.548	8.374
BBS7	8.635	8.169	7.584	5.371	6.109	6.183	6.17	5.779	6.047	5.93	8.243	7.861	7.515	5.784	6.421	6.85	6.887	6.585	6.938	6.964
BBX	10.884	11.302	10.814	8.668	9.56	10.124	9.821	9.484	9.709	10.328	11.061	11.072	10.517	8.841	9.42	9.961	10.042	9.677	9.823	10.201
BCAP29	8.964	8.984	8.777	8.296	8.668	9.153	9.119	9.041	9.11	9.53	8.899	9.015	8.809	8.964	8.702	9.136	9.292	9.292	9.422	9.561
BCAP31	12.305	13.409	12.496	11.67	12.584	13.016	12.881	12.775	12.943	13.243	12.612	12.805	12.717	12.311	12.135	12.711	12.704	12.714	12.92	13.256
BCAR1	9.166	9.23	9.482	8.538	9.165	9.874	8.593	8.652	8.077	8.576	8.99	9.446	8.749	8.721	9.482	8.768	9.384	8.758	8.521	8.695
BCAR3	4.59	4.547	4.464	3.996	4.717	4.566	4.645	4.629	4.513	4.569	4.815	4.608	4.499	4.314	4.558	4.486	4.388	4.58	4.231	4.393
BCAS1	8.174	8.492	7.887	6.982	7.27	7.635	7.485	7.35	7.641	7.859	8.769	8.296	7.877	7.503	7.252	7.667	7.713	7.639	8.123	8.214
BCAS2	10.233	10.47	10.43	9.873	10.428	10.544	10.197	9.833	10.01	10.215	10.397	10.272	10.307	10.269	10.522	10.351	10.283	9.912	10.186	10.245
BCAS3	9.159	9.473	9.314	8.948	9.042	9.457	9.383	9.041	9.197	9.625	9.177	9.129	9.079	9.045	8.739	9.053	9.319	9.021	9.29	9.606
BCAT1	9.91	9.477	9.37	7.479	7.274	7.361	7.012	7.599	6.982	7.341	10.231	9.541	9.224	8.282	7.227	7.535	7.707	7.655	7.523	7.61
BCDO2	8.97	8.488	8.45	7.209	8.442	8.632	9.029	8.476	8.064	8.537	7.929	8.178	8.225	8.425	8.403	8.498	8.725	8.489	8.375	8.597
BCHE	7.16	7.434	6.284	4.486	4.847	5.33	4.751	4.967	5.337	5.232	7.228	7.347	7.077	5.034	5.057	4.866	4.756	5.346	5.559	5.655
BCKDHA	11.796	12.797	12.358	11.77	12.4	12.817	13.2	12.534	12.64	12.78	12.025	12.276	12.178	12.323	12.583	12.694	13.11	12.817	13.099	13.253
BCKDHB	9.564	9.54	9.232	8.997	9.431	9.92	9.653	9.443	9.424	9.534	9.4	9.37	9.04	9.44	9.462	9.653	9.784	9.526	9.661	9.578
BCL10	9.445	9.561	8.927	8.008	8.478	8.453	8.521	8.336	8.192	8.645	9.317	9.403	9.299	8.509	8.412	8.633	8.609	8.464	8.396	8.766
BCL11A	8.503	6.818	5.349	4.602	4.645	4.977	4.76	4.866	4.798	4.855	9.185	6.223	5.506	4.931	4.592	4.894	4.807	5.142	4.726	4.727
BCL11B	8.858	7.53	6.108	5.19	5.551	5.562	5.707	5.342	5.68	5.532	8.932	7.04	6.018	5.535	5.544	5.528	5.802	5.709	5.796	5.619
BCL2	5.67	5.668	5.65	5.284	5.391	5.747	5.446	5.551	5.482	6.052	5.84	5.332	5.114	5.704	5.492	5.642	5.598	5.848	5.674	6.339
BCL2A1	7.271	7.045	6.933	5.803	6.737	6.399	6.963	6.384	6.863	6.629	7.21	7.296	6.872	6.346	6.474	6.246	6.844	6.51	6.996	6.565
BCL2L1	11.277	11.417	11.563	12.176	11.764	11.286	10.869	10.604	10.504	11.869	11.347	11.116	11.466	12.264	11.694	11.257	10.992	10.887	10.772	11.988
BCL2L11	8.163	8.008	7.954	7.223	7.643	7.679	7.939	7.166	7.269	7.137	8.278	7.848	7.714	6.845	7.2	7.288	7.587	7.072	7.361	7.233
BCL2L12	6.038	6.061	6.035	5.054	5.473	5.542	5.378	5.006	5.418	5.7	6.219	5.967	5.895	5.431	5.139	4.903	5.516	5.293	5.65	5.611
BCL2L13	12.395	13.492	13.333	14.373	14.564	15.042	14.699	14.574	14.604	15.145	12.733	13.011	13.15	14.808	14.352	14.712	14.859	14.939	14.899	15.187
BCL2L14	4.776	5.496	4.622	4.918	4.924	4.655	4.455	4.406	4.854	4.829	4.298	4.505	4.373	4.181	4.852	5.299	5.031	5.649	4.893	5.195
BCL2L2	9.906	9.492	8.296	6.711	7.403	6.811	6.927	7.167	7.113	8.409	9.947	9.017	8.276	7.507	6.615	6.429	6.892	7.189	7.239	8.478
BCL3	9.474	9.963	9.733	9.825	9.744	10.226	9.815	9.438	9.272	9.939	9.42	9.501	9.871	9.981	9.706	10.125	9.69	9.624	9.503	9.992
BCL6	6.539	7.461	8.355	9.027	8.945	9.207	9.321	8.959	8.421	9.042	7.011	7.231	7.677	9.662	8.405	8.685	9.356	9.035	8.422	8.492
BCL7A	7.478	8.05	7.64	7.478	6.823	7.023	7.046	6.759	6.844	7.048	7.762	7.814	7.389	7.739	6.328	6.846	6.897	6.723	7.026	6.978
BCL7C	12.928	13.38	12.745	11.045	11.3	11.476	11.205	10.722	11.178	11.452	13.071	13.068	12.724	11.69	11.422	11.334	11.406	10.93	11.616	11.529
BCL9	11.115	10.95	11.386	10.853	10.29	10.279	10.032	10.011	9.969	10.163	11.262	10.901	11.134	10.816	10.22	10.114	10.154	10.134	10.264	10.137
BCL9L	6.063	6.401	6.234	5.506	5.488	5.804	5.466	5.373	5.554	5.992	6.475	6.022	6.028	5.73	5.669	5.66	5.67	5.293	5.686	5.921
BCLAF1	7.939	7.777	7.25	7.346	7.051	7.261	7.241	6.718	6.735	7.122	7.854	7.719	7.055	7.678	6.852	7.061	7.235	7.187	7.147	7.48
BCORL1	13.324	13.521	13.126	13.274	11.662	11.69	11.928	11.832	11.451	12.182	13.506	13.178	13.128	13.522	11.638	11.693	11.956	11.989	11.701	12.506
BCS1L	10.484	10.646	10.418	10.852	11.323	11.811	11.889	11.278	11.37	11.732	10.663	10.411	10.679	11.848	11.321	11.588	11.568	11.638	11.826	11.831
BDA20	4.879	5.537	5.457	4.848	4.394	4.77	5.069	4.855	4.628	5.155	5.382	5	5.396	5.32	4.662	4.652	4.99	4.89	4.78	4.893
BDH1	7.168	8.443	6.113	7.472	7.575	7.929	7.777	8.015	8.711	8.888	6.684	7.261	7.265	8.041	7.474	7.879	8.043	8.127	9.136	9.125
BDKRB2	4.584	5.302	5.83	4.513	4.484	4.37	4.721	4.39	4.947	5.011	4.731	5.071	5.333	5.05	4.393	4.517	4.708	4.541	4.961	5.12
BDNF	6.378	6.229	6.602	5.262	4.985	5.126	4.804	5.124	4.65	4.531	6.484	6.34	6.519	6.06	5.004	5.328	5.067	5.617	4.475	4.661
BDP1	7.228	7.189	7.144	6.461	6.816	6.827	6.585	6.304	6.446	6.666	6.99	6.849	6.527	6.769	6.535	6.523	6.741	6.403	6.332	6.744
BE236620	9.191	8.836	9.784	8.522	11.105	11.417	11.183	10.948	11.102	11.005	9.704	8.602	9.749	9.462	10.807	11.261	11.31	11.142	11.244	11.076
BE236747	7.141	7.099	6.672	6.363	5.79	5.656	5.657	5.424	5.529	5.829	7.014	6.791	6.961	6.427	5.641	5.46	5.808	5.572	5.689	5.956
BE237007	10.033	10.204	9.871	9.069	9.955	10.05	9.925	9.846	9.53	9.837	10.321	10.094	9.656	9.612	9.906	9.944	10.32	10.091	9.777	9.856
BE237096	10.524	9.983	9.186	8.549	8.695	8.841	8.493	8.487	9.124	9.407	10.634	9.564	9.327	8.978	8.631	8.77	8.804	8.717	9.479	9.674
BE476245	9.405	9.106	8.818	8.416	8.38	8.42	8.207	7.867	8.119	8.286	9.164	8.861	8.777	8.721	8.312	8.168	8.542	8.045	8.427	8.233
BE476534	7.208	7.461	7.572	5.752	5.991	6.262	5.555	5.91	6.008	5.8	7.399	7.316	7.402	6.156	6.026	5.784	6.207	6.092	6.464	5.969
BE477037	8.578	8.152	8.153	7.433	8.567	8.858	8.477	8.061	7.944	8.509	8.654	8.241	7.982	7.986	8.321	8.403	8.663	8.221	8.299	8.397
BE477168	9.162	9.332	9.76	8.767	9.03	9.035	8.657	8.585	8.661	8.72	9.306	9.484	9.58	8.948	8.829	8.679	8.884	8.761	8.869	8.642
BE477835	6.031	6.209	5.878	5.258	5.37	5.581	5.204	5.133	5.23	5.701	6.14	5.881	5.695	5.815	5.38	5.272	5.471	5.47	5.5	5.697
BE478252	12.448	12.751	12.021	10.674	11.558	11.47	11.613	11.108	11.117	11.506	12.693	12.403	12.165	11.569	11.097	11.284	11.603	11.214	11.279	11.526
BE478348	11.239	12.802	13.755	12.766	12.976	13.035	13.263	12.885	12.96	13.167	11.068	12.552	13.889	13.302	12.923	12.959	13.18	13.094	13.107	13.184
BE478499	6.599	6.812	6.865	6.576	6.347	6.484	6.411	6.045	6.244	6.501	6.813	6.527	6.653	6.932	6.083	6.089	6.601	6.23	6.457	6.415
BE478680	13.272	13.524	13.288	11.739	13.057	13.768	13.561	13.237	13.285	13.261	13.472	13.225	13.28	12.393	13.093	13.474	13.721	13.389	13.559	13.406
BE478799	13.72	13.291	12.6	11.333	11.939	11.809	11.918	11.533	11.753	12.351	13.501	12.95	12.585	12.498	11.728	11.828	12.278	11.908	12.14	12.549
BE480869	7.844	8.026	8.279	8.18	8.521	8.487	8.487	8.064	7.988	7.944	8.123	7.766	8.091	8.369	8.483	8.281	8.627	8.133	8.282	7.993
BE481027	6.112	5.669	6.141	5.066	5.723	6.207	5.472	5.089	5.493	5.573	6.171	6.139	6.128	5.246	5.641	5.896	5.928	5.391	5.771	5.526
BE481063	10.682	10.564	10.346	11.364	11.145	10.378	10.87	10.112	10.345	10.778	10.547	10.352	10.076	10.625	10.711	10.116	10.862	10.415	10.387	10.916
BE481987	6.146	6.076	6.441	5.436	6.352	6.062	6.255	5.799	6.146	6.235	6.174	6.349	6.179	5.457	5.694	5.511	6.415	5.79	6.025	6
BE482468	7.935	6.787	6.21	5.682	6.906	7.124	6.823	7.068	7.122	7.441	6.501	5.888	6.019	6.071	6.894	7.052	6.942	7.273	7.46	7.718
BE484807	6.973	6.656	6.44	5.463	5.652	5.927	5.442	5.329	5.802	6.113	6.982	6.385	6.319	5.824	5.543	5.634	5.69	5.534	5.869	6.138
BE485002	9.545	10.263	9.902	8.278	8.823	8.678	9.114	8.364	8.5	8.729	9.697	10.087	10.211	9.1	8.609	8.708	9.047	8.453	8.778	8.94
BE485568	8.932	8.746	8.678	8.873	8.848	8.437	8.769	7.948	8.309	8.874	9.01	9	8.391	9.43	8.501	8.029	8.129	7.815	8.33	9.174
BE485731	11.592	11.45	11.582	12.863	13.174	13.578	13.667	12.792	12.792	12.925	11.515	11.006	11.512	13.667	12.847	13.079	13.204	12.651	12.95	12.865
BE485785	12.115	12.762	12.719	10.299	11.396	11.578	11.025	10.932	11.051	11.139	12.141	12.614	12.718	11.234	11.446	11.377	11.588	11.277	11.442	11.479
BE496802	6.848	6.788	6.525	6.57	6.694	6.837	6.716	6.165	6.475	6.328	7.054	6.609	6.494	7.191	6.584	6.671	6.533	6.295	6.533	6.414
BE505079	11.915	11.835	10.957	9.347	9.527	9.905	9.714	9.428	9.363	9.655	11.961	11.543	11.147	10.182	9.361	9.68	9.696	9.465	9.57	9.887
BE588451	7.117	7.593	7.171	5.048	5.732	5.678	5.915	5.358	5.357	5.505	7.401	7.661	7.223	5.628	5.459	5.781	6.598	5.583	5.811	5.812
BE588696	8.95	9.662	9.089	6.857	8.253	8.133	7.808	7.406	7.639	7.934	8.835	9.19	8.885	7.503	8.255	7.751	8.063	7.598	7.964	7.955
BE588794	9.392	9.779	9.238	7.735	8.748	8.529	8.361	8.058	8.186	8.082	9.235	9.223	9.556	8.366	8.849	8.69	8.806	8.263	8.692	8.274
BE588803	5.658	4.598	4.799	4.428	4.424	4.673	4.312	4.265	4.624	4.537	5.333	4.749	4.415	4.914	4.543	4.442	4.257	4.401	4.676	4.673
BE589407	9.136	9.08	8.407	7.774	8.258	8.475	8.837	8.136	8.529	9.137	9.228	8.743	8.084	8.311	8.379	8.349	8.549	8.157	8.845	9.072
BE589840	9.306	8.987	8.413	6.639	7.081	7.17	6.252	6.502	6.85	6.955	9.336	8.673	8.673	7.161	7.303	7	6.866	6.752	7.164	7.299
BE663192	11.8	12.608	13.657	13.545	14.486	14.999	15.225	14.75	14.677	14.918	11.9	12.725	13.398	14.321	14.251	14.856	15.38	15.258	14.911	15.032
BE663381	7.727	6.073	6.148	5.841	5.986	5.844	5.745	5.611	5.734	5.924	6.162	5.703	5.927	6.094	5.647	5.614	5.897	5.802	5.822	5.878
BE663485	10.861	10.629	10.311	9.191	9.902	10.965	11.085	10.395	10.447	10.767	10.968	10.083	10.148	9.548	9.66	10.497	11.145	10.335	10.75	10.752
BE663677	8.874	10.421	10.659	8.02	8.986	9.225	8.826	8.646	8.812	8.83	9.275	10.07	10.333	8.225	9.116	9.027	9.325	8.959	9.309	8.856
BE663804	10.882	10.627	10.596	8.651	8.663	8.503	8.809	8.252	8.008	8.357	10.951	10.469	10.741	9.182	8.587	8.381	8.758	8.257	8.295	8.394
BE663821	6.968	6.895	7	6.152	6.507	6.858	6.533	6.371	6.658	7.457	7.072	6.799	6.728	6.74	6.545	6.694	6.639	6.524	6.906	7.389
BE664039	7.293	7.044	5.848	4.817	5.026	5.183	4.792	4.594	5.07	4.45	6.95	6.817	5.764	5.039	5.097	4.962	5.039	5.027	5.176	5.053
BE664066	9.229	8.341	7.422	6.477	7.033	6.622	6.672	6.446	6.729	6.445	9.07	7.997	7.533	7.151	7.017	6.735	6.807	6.848	6.915	6.844
BE664117	12.433	10.904	10.681	7.443	9.265	9.197	8.848	9.248	8.967	8.406	12.465	10.687	10.776	8.267	8.818	8.6	9.214	9.219	9.175	8.448
BE665610	10.13	9.377	8.76	4.767	5.741	5.37	5.019	5.221	5.403	5.038	10.305	9.21	8.682	5.532	5.573	4.763	5.513	5.28	5.49	5.06
BE665757	5.312	5.38	5.384	4.507	5.004	4.752	4.472	4.268	4.795	4.605	5.069	5.388	5.345	4.615	5.037	4.5	5.092	4.78	4.836	4.79
BE665842	9.613	9.465	9.108	8.088	8.099	7.936	7.952	7.841	7.578	8.521	9.386	9.207	9.107	8.307	7.979	7.786	8.247	8.029	8.021	8.669
BE665872	7.446	6.678	6.073	4.589	5.06	4.788	4.505	4.722	4.858	4.977	7.277	6.514	6.179	4.877	4.91	4.566	4.857	4.62	4.819	4.962
BE666202	12.166	12.796	11.526	9.648	10.619	10.477	10.53	10.173	10.575	11.331	12.529	12.276	11.647	10.615	10.539	10.597	10.824	10.491	11.105	11.43
BE666332	4.926	5.43	5.502	4.994	5.148	4.657	4.752	4.647	4.896	4.79	5.44	4.974	5.111	5.479	4.986	4.604	4.892	4.541	4.968	4.569
BE666672	10.441	11.516	11.261	10.608	10.716	11.275	11.335	11.191	11.457	11.227	10.584	10.815	10.894	10.705	10.513	10.9	11.182	11.257	11.544	11.361
BE666734	9.957	10.037	9.847	8.536	9.195	9.331	9.389	8.752	8.848	9.356	9.852	9.638	9.614	9.16	8.76	8.792	9.397	8.676	9.106	9.16
BE667042	11.196	10.211	9.474	6.164	7.861	8.019	8.293	8.011	7.829	8.264	10.479	10.164	9.575	7.243	7.778	7.907	8.444	8.064	8.185	8.613
BE667105	8.342	8.663	7.726	7.95	8.415	8.754	9.195	8.659	8.557	8.843	8.513	8.329	7.842	8.988	8.357	8.672	8.922	8.657	8.798	8.864
BE667263	6.176	6.301	6.378	5.444	5.893	6.382	5.777	5.508	5.818	6.002	6.444	6.17	5.992	5.866	5.771	5.796	5.543	5.608	5.811	5.951
BE667341	4.575	5.3	4.83	4.801	5.082	5.211	5.181	4.693	5.065	5.65	4.585	4.604	4.831	4.922	4.748	4.667	5.332	4.885	5.229	5.599
BE667440	6.187	6.144	6.404	6.882	6.106	5.63	6.021	5.34	5.7	6.581	6.276	6.148	6.178	7.062	5.323	5.024	6.021	5.507	5.803	6.305
BE667469	11.062	11.43	11.354	7.446	9.203	9.098	8.744	9.097	9.395	8.576	11.267	11.181	11.172	7.771	9.35	8.92	9.486	9.143	9.777	8.712
BE667626	4.959	5.081	4.719	4.563	4.849	4.691	4.628	4.44	4.798	5.022	5.002	4.503	4.284	4.85	5.033	4.855	4.578	4.641	4.878	5.203
BE667722	9.4	8.899	8.452	4.46	5.383	5.919	5.412	5.074	5.501	5.59	9.852	9.069	8.131	5.035	5.43	5.799	5.86	5.201	5.633	5.501
BE667946	5.873	5.242	4.934	4.592	4.59	4.587	4.66	4.43	4.748	4.886	6.119	5.301	4.889	4.476	4.504	4.377	4.396	4.594	4.832	5.016
BE668110	8.007	7.066	7.123	6.427	6.536	6.308	6.354	6.078	6.146	6.334	7.827	6.853	6.867	6.794	6.124	5.937	6.34	6.217	6.283	6.236
BE668306	10.091	9.861	9.482	8.12	9.336	9.471	9.553	8.933	8.963	9.023	9.836	9.678	9.277	8.824	9.132	9.148	9.561	8.915	9.077	8.978
BE668370	8.111	7.346	6.539	4.476	5.035	4.681	4.688	4.809	4.859	4.696	8.304	7.229	6.442	4.77	5.053	4.89	4.514	4.851	5.211	4.783
BE668474	4.836	5.087	4.825	4.678	5.28	5.328	5.064	4.89	5.201	5.385	4.816	4.986	4.873	5.05	4.843	5.019	5.336	5.18	5.286	5.343
BE668539	8.883	8.765	8.844	9.092	9.879	9.039	8.467	8.306	9.059	8.89	9.073	8.346	8.522	9.332	9.331	9.365	9.109	8.38	9.346	9.062
BE668752	10.966	11.004	10.275	8.711	8.535	9.241	9.032	8.353	8.691	8.88	11.14	10.496	10.393	9.563	8.491	9.173	9.189	8.479	9.003	8.937
BE668933	10.177	10.849	10.823	9.611	10.669	11.108	11.174	10.568	10.89	10.812	10.683	10.79	10.636	10.279	10.487	10.639	11.114	10.602	10.951	10.77
BE668987	7.329	7.348	7.506	6.907	7.164	7.617	7.026	6.997	7.006	7.395	7.653	7.454	7.312	7.158	7.102	7.34	7.354	7.308	7.24	7.488
BE669011	8.441	9.912	10.684	8.538	10.244	10.23	9.715	9.74	9.704	9.829	8.613	9.86	10.596	9.53	10.355	10.162	10.188	9.952	10.193	9.892
BE681610	5.831	5.95	6.218	6.083	6.104	6.438	6.102	6.015	6.088	6.542	6.316	5.912	5.997	6.314	5.87	6.128	6.086	6.085	6.167	6.506
BE681740	8.898	7.304	6.234	5.576	5.53	5.529	5.788	5.584	6.516	6.48	8.91	6.952	6.5	5.866	5.396	5.435	5.927	5.709	6.562	6.573
BE681758	5.432	6.263	5.232	4.967	5.16	5.176	5.342	4.97	5.822	5.379	5.777	6.094	5.603	4.597	5.172	5.285	5.343	5.383	5.716	5.545
BE681909	10.156	11.028	10.027	10.088	10.263	9.602	9.88	9.663	9.987	10.263	10.555	10.521	10.404	10.542	10.321	9.787	9.993	10.538	10.405	10.762
BE683018	6.977	7.172	7.986	8.115	9.265	10.07	9.9	9.439	9.903	9.46	7.229	7.133	8.114	9.069	9.594	9.975	10.411	9.969	10.262	9.762
BE683238	9.467	9.38	8.771	7.431	8.609	8.576	8.774	8.264	8.498	8.471	9.566	9.108	8.698	8.557	8.18	8.28	8.851	8.34	8.551	8.405
BE683376	7.591	7.598	7.69	7.362	7.415	7.455	7.036	6.955	7.013	7.115	7.9	7.44	7.461	7.46	7.162	6.994	7.284	7.069	7.251	7.137
BE683558	12.263	11.171	10.608	7.923	9.091	9.196	9.307	8.728	8.793	9.012	12.675	10.713	9.847	8.26	8.671	8.788	8.764	8.732	9.218	9.636
BE683805	6.869	7.82	7.583	6.184	7.599	7.827	7.736	7.334	7.226	7.64	6.802	7.302	7.451	7.235	7.441	7.761	7.766	7.676	7.525	7.652
BE684407	10.165	9.384	8.092	5.129	5.89	6.023	5.86	5.705	5.687	6.035	9.512	8.714	8.598	5.957	5.642	5.826	6.357	5.856	6.078	6.362
BE684818	9.332	9.539	9.268	9.477	9.846	9.958	9.914	9.899	9.557	10.103	9.219	9.379	9.562	9.869	9.491	9.755	9.923	10.056	9.643	10.352
BE684830	9.681	9.225	8.646	6.55	7.798	8.08	8.277	7.678	7.875	8.051	9.509	9.001	8.669	7.331	7.68	7.87	8.19	7.82	8.119	8.199
BE685158	5.584	5.071	5.082	4.47	4.892	4.375	4.284	4.769	4.407	4.852	6.121	4.912	4.659	4.837	4.642	4.638	4.677	4.652	4.558	4.541
BE685481	12.108	12.039	11.823	9.618	9.899	10.246	9.743	9.486	9.798	10.087	12.726	12.327	11.396	10.406	10.294	10.573	10.562	10.336	10.576	10.783
BE721389	11.46	11.431	11.161	11.801	11.409	11.751	11.671	11.47	11.43	11.748	11.374	11.483	11.091	11.79	11.349	11.669	11.564	11.629	11.633	11.775
BE721767	14.492	14.648	13.962	13.585	13.137	12.797	13.737	12.979	13.249	13.404	14.627	14.216	14.136	13.216	12.742	12.635	13.373	13.2	13.464	13.638
BE721907	7.244	7.075	7.466	9.473	9.163	8.728	8.112	7.375	7.653	8.263	7.581	7.021	7.015	9.291	9.178	8.601	8.05	7.496	8.021	8.255
BE722042	9.906	8.014	7.535	5.801	7.368	7.749	8.186	7.356	7.644	7.001	7.441	7.166	7.991	6.48	7.522	7.52	7.977	7.051	7.625	6.692
BE722233	12.894	13.529	13.004	10.444	10.987	11.543	11.326	11.258	11.17	11.252	12.981	13.552	13.075	10.958	10.948	11.533	11.617	11.414	11.535	11.662
BE722771	9.237	8.754	7.918	7.767	7.558	7.737	8.251	7.582	7.752	7.808	9.034	8.726	8.142	7.481	7.368	7.464	7.641	7.443	7.681	7.665
BE722898	7.213	7.287	6.883	6.132	6.16	6.203	5.601	5.506	5.855	6.05	7.328	7.038	6.365	6.307	5.866	5.718	5.725	5.707	5.953	6.13
BE723307	7.307	7.357	6.665	4.928	5.263	5.11	4.816	4.991	5.188	5.386	7.927	7.761	6.934	6.212	6.063	5.771	6.018	5.486	6.011	5.998
BE723626	11.362	11.671	11.538	13.468	14.197	14.633	13.938	14.133	14.24	14.52	11.56	11.281	11.529	13.653	14.073	14.104	14.048	14.105	14.391	14.367
BE723797	7.578	7.033	7.048	6.367	6.439	6.506	6.344	5.981	5.855	6.403	7.536	6.932	6.696	6.873	5.901	6.025	6.313	6.086	5.993	6.27
BE723823	11.153	10.683	10.387	8.628	9.159	9.782	9.654	9.806	9.33	9.676	10.586	10.588	10.634	9.188	9.208	9.788	9.546	10.124	9.848	9.891
BE724223	13.923	14.024	13.174	12.131	12.439	12.848	12.599	12.305	12.42	13.031	14.195	13.622	12.879	12.264	12.057	12.496	12.479	12.44	12.578	12.914
BE749263	9.782	9.687	9.034	8.657	9.057	9.619	9.17	9.446	9.142	9.641	9.596	9.635	9.213	9.107	8.973	9.389	8.869	9.533	9.132	9.567
BE749650	10.287	6.783	6.117	8.569	9.406	10.088	10.013	10.135	9.987	11.011	8.108	6.591	6.475	8.749	9.271	9.926	10.3	10.985	10.715	11.541
BE749869	4.994	5.182	5.05	4.54	4.445	4.305	4.931	4.959	4.573	4.75	5.173	5.006	4.926	4.796	4.589	4.965	4.572	4.858	4.505	4.766
BE749907	7.306	7.277	6.938	7.078	7.794	8.309	7.872	7.696	7.818	7.773	7.318	7.144	6.782	7.889	7.71	8.1	7.9	7.688	7.811	7.624
BE750124	5.098	5.108	4.99	5.36	6.059	6.077	5.679	5.569	5.773	5.902	5.151	4.927	4.648	5.495	5.943	5.619	6.146	6.02	5.742	5.816
BE750366	8.91	8.8	8.126	6.597	7.438	7.233	7.844	7.064	7.304	7.333	9.069	8.338	7.848	6.916	6.966	6.744	7.802	7.239	7.45	7.262
BE750402	9.96	12.032	11.911	11.459	11.624	11.346	11.914	11.489	11.837	12.412	10.514	11.224	11.552	11.753	11.175	11.097	11.708	11.381	11.823	12.178
BE750488	11.018	10.508	10.03	7.454	8.7	9.093	9.348	8.51	8.732	8.729	10.717	10.381	9.837	8.44	8.62	8.901	9.061	8.567	8.856	8.583
BE750561	9.643	10.309	9.97	8.011	7.2	6.933	6.987	6.927	6.62	6.704	9.74	10.357	10.072	7.893	7.007	6.724	7.08	6.755	6.814	6.827
BE751286	11.181	10.589	9.62	9.405	9.108	9.245	9.693	8.892	8.638	9.013	11.33	10.797	9.74	9.122	8.827	9.283	9.375	9.173	8.868	9.241
BE751968	11.953	11.018	9.202	7.242	6.501	6.295	6.08	5.951	6.021	6.449	11.703	10.556	9.814	7.394	6.616	6.334	6.213	6.326	6.215	6.749
BE752006	5.811	5.959	6.134	6.463	6.555	6.737	6.214	5.992	6.243	6.728	6.076	5.886	6.116	6.421	6.372	6.325	6.475	6.131	6.455	6.696
BE752367	9.723	8.978	8.294	6.508	6.141	6.061	5.748	5.567	5.904	6.49	9.462	8.542	8.661	6.586	6.195	5.907	5.905	5.987	6.583	7.12
BE752458	7.049	7.015	7.109	6.319	6.736	6.766	6.902	6.244	7.642	6.762	7.227	6.753	6.863	6.739	6.483	6.423	6.878	6.291	7.705	6.555
BE752650	12.65	12.395	11.775	11.473	12.634	12.555	12.964	12.611	12.916	13.097	10.719	12.274	11.57	11.997	12.401	12.435	13.348	12.439	12.983	12.816
BE752797	10.875	10.703	9.297	6.313	7.251	7.687	7.748	7.263	7.657	7.517	10.217	10.139	9.743	7.27	7.115	7.488	8.173	7.136	7.964	7.599
BE752842	13.466	13.657	13.432	10.63	11.148	11.323	11.408	10.967	10.614	11.242	13.821	13.397	13.151	11.011	10.635	10.868	11.251	10.888	10.84	11.019
BE752935	11.243	11.25	10.741	8.216	8.379	7.547	8.433	7.835	7.512	7.777	11.157	11.086	10.69	8.257	8.034	7.382	8.264	7.648	7.631	7.911
BE753612	9.772	9.83	9.068	7.252	7.668	7.495	7.222	7.083	7.132	7.62	9.734	9.223	9.14	7.672	7.478	7.356	7.44	7.537	7.506	7.765
BE754633	9.898	10.404	10.785	9.23	9.893	9.675	9.531	9.379	9.183	9.628	9.761	10.015	10.78	9.44	9.653	9.262	9.882	9.474	9.366	9.602
BE755171	12.514	13.7	13.478	13.758	14.335	14.625	14.144	14.384	14.371	14.895	12.8	13.333	13.737	14.138	14.2	14.442	14.423	14.562	14.726	15.004
BE755472	9.111	9.999	10.032	10.561	9.601	9.881	9.825	9.65	9.746	10.183	9.087	9.637	10.213	10.528	9.587	9.589	9.654	9.87	9.946	10.348
BE755646	11.621	11.627	12.32	12.025	12.824	12.902	12.425	12.227	12.329	12.269	11.783	11.536	12.061	12.219	12.737	12.615	12.592	12.376	12.631	12.223
BE756249	7.513	7.989	7.228	6.387	6.71	7.083	6.973	6.533	6.655	7.165	7.735	7.665	6.781	7.129	6.414	7.136	7.331	6.985	7.168	7.546
BE756602	7.826	7.066	6.164	6.18	6.11	6.169	5.591	5.787	6.143	6.398	8.267	6.174	6.668	7.104	6.318	6.29	6.141	6.133	6.548	6.781
BE757830	7.976	7.772	7.691	6.839	8.096	8.399	8.467	7.683	7.967	7.893	8.02	7.648	7.134	7.312	7.654	7.751	8.458	7.472	7.851	7.803
BE758159	10.582	10.759	10.708	8.64	9.003	9.088	8.896	8.537	8.756	8.881	10.866	10.795	10.664	9.363	9.111	9.137	8.938	8.921	9.091	9.059
BE807987	5.884	6.093	5.684	5.301	4.817	5.147	5.219	5.072	4.842	5.371	5.944	5.79	5.52	5.636	4.667	4.621	4.995	4.864	4.882	5.394
BE808742	11.438	11.208	10.636	9.922	9.464	9.578	9.668	9.478	9.585	9.961	11.256	10.91	10.738	10.179	9.291	9.716	9.688	9.709	9.753	10.172
BE809578	13.632	12.204	11.817	10.633	10.666	10.245	10.455	10.172	10.207	10.649	13.297	11.659	11.879	10.599	10.49	9.994	10.404	10.111	10.51	10.978
BE845792	8.47	8.372	8.708	11.669	12.391	13.193	12.175	12.466	12.048	12.332	8.634	8.207	8.606	11.585	12.316	12.788	12.806	12.566	12.174	12.298
BE846360	11.734	11.254	10.446	7.862	7.937	7.45	7.543	7.502	7.585	7.181	11.693	11.114	10.902	7.775	8.191	7.931	7.832	7.629	7.704	7.27
BE846383	6.178	6.584	6.248	6.059	5.667	5.981	5.594	5.343	6.144	5.923	6.137	6.045	6.555	6.02	5.699	5.868	5.839	5.603	6.47	6.558
BECN1	11.694	11.991	11.638	11.631	11.825	11.65	12.235	11.67	11.849	11.857	11.743	11.644	11.551	11.989	11.588	11.575	12.107	11.752	11.861	11.948
BET1	11.379	10.825	10.224	10.246	10.578	10.715	10.456	10.754	10.368	10.704	10.666	11.032	10.475	10.51	10.598	10.826	10.731	10.768	10.703	10.839
BET1L	5.936	5.948	6.09	5.455	6.125	6.178	5.563	5.546	5.446	5.759	6.182	5.917	6.067	5.757	5.842	5.891	5.792	5.812	5.546	5.77
BF	9.78	12.224	12.283	7.848	8.722	8.448	8.344	8.007	8.428	9.955	10.196	12.777	12.492	8.927	8.173	8.729	8.342	7.72	9.099	9.817
BF039295	10.972	11.452	10.466	8.439	9.934	9.672	9.975	9.433	9.409	9.525	10.992	10.849	10.875	10.12	9.63	9.54	9.901	9.72	9.866	10.556
BF039371	7.961	7.683	7.523	7.114	6.747	6.761	6.552	6.355	6.659	7.001	8.107	7.457	7.216	7.202	6.436	6.465	6.694	6.672	6.821	6.966
BF039583	10.032	10.068	9.568	8.462	8.015	8.305	7.88	7.619	7.735	8.328	10.332	9.735	9.495	9.04	7.901	8.148	7.784	7.758	7.907	8.512
BF039711	5.6	5.989	6.536	6.929	8.722	9.192	8.694	8.334	8.51	8.815	6.021	5.923	6.18	7.034	8.608	8.714	8.949	8.327	8.676	8.92
BF039805	12.674	12.142	12.634	12.788	12.086	12.113	11.95	11.81	11.938	12.271	12.533	12.363	12.446	12.446	11.913	11.885	11.989	11.971	12.223	12.221
BF040161	8.673	8.05	8.851	8.857	10.004	10.931	9.834	10.333	10.443	11.024	9.384	8.731	8.499	9.567	10.103	10.402	10.491	10.572	10.608	11.099
BF040354	10.485	10.33	10.651	10.364	11.322	11.476	11.844	11.237	11.107	11.468	10.835	10.534	10.945	11.404	10.965	11.299	11.927	11.249	11.231	11.516
BF041542	7.203	8.09	7.857	5.994	6.792	6.905	6.483	6.273	6.856	7.381	7.606	7.76	7.876	6.899	6.699	6.766	6.752	6.653	7.537	7.867
BF042216	9.118	8.726	7.9	6.5	7.091	6.648	7.138	6.557	6.604	6.816	8.78	8.387	8.22	6.818	6.659	6.445	7.127	6.682	6.695	7.029
BF042401	10.948	11.143	10.999	7.645	8.338	7.941	8.67	7.744	7.837	8.142	11.051	10.502	10.06	8.708	7.325	7.064	8.711	7.529	7.943	7.862
BF042627	4.703	5.161	4.865	4.824	5.116	5.262	5.26	5.131	5.511	5.466	4.956	4.987	4.817	5.187	4.588	4.911	5.381	5.258	5.399	5.587
BF042686	10.693	10.712	11.021	12.952	13.327	13.501	13.327	13.033	13.031	13.81	10.675	10.616	10.638	13.24	13.134	13.304	13.377	13.069	13.345	13.616
BF042743	10.198	10.55	10.238	9.736	9.601	9.473	9.628	8.973	9.042	9.404	10.431	10.179	10.226	9.586	9.215	9.268	9.505	9.098	9.163	9.501
BF042866	8.286	8.568	8.749	9.318	9.372	9.433	8.959	8.73	8.851	8.935	8.501	8.512	8.586	9.582	8.807	9.046	9.029	8.803	8.976	8.879
BF044233	5.335	5.885	5.506	5.658	6.212	6.091	5.886	5.495	5.569	6.16	5.695	5.45	5.383	6.011	5.771	5.6	5.994	5.757	5.863	6.1
BF044329	6.345	6.435	6.648	5.825	5.592	5.922	5.48	5.052	5.565	5.535	6.536	6.136	6.404	6.406	5.796	5.73	5.582	5.543	5.822	5.811
BF045702	12.572	13.093	13.23	10.942	12.369	12.565	13.154	12.446	12.576	13.303	12.672	12.871	13.33	11.563	12.03	12.386	13.373	12.461	13.009	13.436
BF046236	13.394	13.802	13.52	11.679	12.864	13.163	12.977	12.761	12.58	12.849	13.431	13.509	13.729	11.933	12.403	12.701	12.804	12.502	12.661	12.739
BF046716	7.555	6.275	5.58	4.683	4.662	4.748	4.663	4.682	5.102	5.361	7.652	6.269	5.731	4.927	5.141	4.715	4.859	4.821	5.082	5.883
BF073340	9.437	9.491	9.576	9.552	9.336	10.061	9.627	9.138	9.072	9.542	9.482	9.388	9.325	9.674	8.898	9.392	9.5	9.234	9.2	9.571
BF073941	7.574	7.145	6.522	4.847	4.64	5.062	4.465	4.483	5.009	5.143	7.792	6.999	6.318	4.548	5.094	4.614	4.625	4.593	5.36	4.914
BF074217	10.293	11.259	12.596	13.69	13.442	13.56	13.004	12.806	12.596	13.235	10.944	11.861	12.321	13.876	13.254	13.25	13.023	13.172	13.01	13.242
BF074284	6.529	7.789	7.55	6.698	8.004	8.443	8.481	8.141	8.418	8.107	7.365	7.634	7.732	7.649	8.134	8.408	8.718	8.421	8.505	8.44
BF075332	7.668	6.337	6.227	6.223	6.228	6.621	6.912	6.247	6.537	6.805	6.691	5.479	5.831	6.589	6.176	6.476	6.92	6.516	6.757	6.83
BF076063	14.168	12.934	12.238	10.103	10.656	10.758	10.332	10.643	10.525	10.561	14.953	13.602	12.522	10.598	10.527	10.868	10.562	10.305	11.039	10.671
BF076282	10.129	10.955	10.722	10.389	10.412	10.448	10.589	9.955	10.16	10.575	10.341	10.483	10.582	10.49	10.084	10.129	10.512	10.031	10.348	10.47
BF076400	12.359	12.784	11.48	6.057	8.924	9.535	8.34	8.649	8.974	8.733	13.116	12.598	11.633	7.558	8.793	9.117	8.99	8.709	9.401	8.573
BF077341	9.221	9.115	7.512	5.885	5.972	5.673	5.108	5.307	5.355	5.544	8.802	8.621	7.584	6.146	5.813	5.491	5.495	5.469	5.512	5.656
BF231039	8.726	9.318	8.918	9.897	9.669	10.098	9.736	9.495	9.449	9.293	8.99	8.714	9.098	10.275	9.699	9.959	9.88	9.588	9.727	9.286
BF440169	11.8	11.27	10.978	11.241	11.007	11.517	11.604	10.923	10.803	10.832	11.382	11.285	11.194	10.712	10.828	11.351	11.705	10.965	11.046	10.782
BF440236	7.327	7.473	6.245	4.835	7.447	7.138	7.442	6.565	6.935	6.269	7.139	6.686	6.362	5.446	7.153	7.861	6.822	6.619	6.655	6.248
BF599394	10.449	10.986	10.606	9.991	9.889	9.572	10.545	9.634	9.534	9.807	10.739	10.774	10.819	10.639	9.321	9.096	10.206	9.561	9.413	9.66
BF599496	10.872	11.084	10.774	9.958	10.833	11.103	11.274	10.539	10.894	11.077	11.182	10.813	10.833	10.591	10.72	10.842	11.376	10.84	11.158	11.216
BF599510	12.073	13.096	13.151	13.209	13.56	14.133	14.115	13.725	13.666	14.068	12.434	12.747	13.174	13.646	13.136	13.864	14.146	13.864	13.9	14.096
BF599810	11.927	11.891	11.043	9.803	9.556	9.304	9.108	8.735	8.744	9.069	12.073	11.486	11.234	9.991	9.399	9.236	9.226	8.848	9.05	9.253
BF599902	9.922	9.772	7.68	6.461	6.363	6.391	5.671	5.677	5.884	5.61	10.233	9.612	7.643	7.453	6.041	6.134	6.047	5.645	6	6.38
BF600228	8.925	8.777	8.047	7.101	8.067	8.718	8.655	8.66	8.365	8.386	8.849	9.095	8.415	8.012	7.88	8.611	9.66	8.875	8.817	8.469
BF600523	9.444	8.538	7.186	4.992	5.654	5.608	5.818	5.635	5.828	6.416	9.204	8.506	7.371	5.683	5.063	5.435	5.448	5.938	5.85	6.391
BF600572	10.423	10.465	10.326	9.618	9.896	10.008	10.088	9.819	9.66	10.134	10.412	10.153	10.283	9.942	9.625	9.861	10.139	9.99	9.786	10.393
BF600598	9.946	10.248	9.089	6.168	7.533	7.811	7.427	7.172	7.199	7.253	10.002	10.305	8.889	7.298	7.491	7.346	7.614	7.316	7.355	7.401
BF601581	10.866	10.885	10.627	9.952	10.371	10.757	10.515	9.76	9.854	10.329	10.917	10.569	10.44	10.533	10.222	10.349	10.403	9.976	10.089	10.31
BF601849	11.57	10.991	10.917	10.433	10.693	10.514	9.651	9.875	10.271	10.457	11.546	11.147	10.998	11.821	11.19	10.653	10.663	10.853	10.711	10.844
BF602046	12.136	12.45	11.867	12.392	12.959	12.292	11.574	11.025	11.354	12.073	12.209	12.069	11.857	12.543	12.57	12.015	11.52	11.106	11.443	12.172
BF602380	5.612	5.669	5.535	5.293	5.469	5.397	5.441	5.277	5.324	5.246	6.036	5.412	5.371	5.641	4.962	5.236	5.537	5.303	5.426	5.289
BF602876	9.42	10.294	9.29	6.698	7.908	8.151	7.519	7.9	7.941	8.277	9.799	9.829	9.717	7.826	8.014	8.245	7.892	8.054	8.455	8.478
BF602916	10.583	10.846	9.984	6.814	7.269	7.56	7.15	6.948	6.995	7.151	10.978	10.796	10.071	7.559	7.533	7.567	7.513	7.195	7.293	7.471
BF603545	10.592	11.18	10.934	9.995	10.773	10.693	11.425	10.494	10.912	10.902	10.606	10.918	11.049	10.422	10.625	10.73	11.259	10.384	10.99	11.035
BF603684	10.776	11.103	11.835	10.659	10.336	10.954	10.968	10.567	10.217	10.909	11.177	11.409	11.421	11.192	10.102	10.733	10.523	10.451	10.238	10.957
BF603876	5.978	5.939	5.984	5.005	5.682	6.358	5.458	5.338	5.619	5.837	6.115	5.942	5.793	5.227	5.591	5.797	5.834	5.822	5.743	5.809
BF604023	12.261	12.57	12.385	9.835	10.482	10.728	11.084	10.542	10.564	10.883	12.322	12.259	12.271	10.482	10.356	10.534	10.84	10.568	10.829	10.906
BF604070	12.724	12.437	11.709	10.307	9.93	10.109	10.244	9.865	9.943	10.407	12.803	12.099	11.866	10.491	9.8	10.196	10.362	9.983	10.168	10.736
BF604441	9.227	8.96	8.148	5.968	6.799	6.369	6.867	6.222	6.172	6.51	9.015	8.437	8.309	6.91	6.587	5.978	6.998	6.379	6.461	6.665
BF604750	12.032	11.714	11.181	7.477	11.556	12.392	11.482	12.511	12.298	12.219	12.198	11.108	10.728	7.892	11.487	12.106	11.551	12.515	12.398	12.268
BF604996	12.294	12.327	12.943	12.149	12.605	12.844	12.343	12.297	12.322	12.474	12.482	12.166	12.648	12.321	12.576	12.576	12.483	12.39	12.627	12.459
BF605209	11.039	11.301	12.188	10.542	10.775	10.845	10.397	9.935	9.884	10.164	11.132	11.024	11.884	10.756	10.507	10.345	10.456	10.126	10.144	10.222
BF605399	11.461	11.278	10.782	9.388	9.731	9.883	9.939	9.311	9.566	9.62	11.418	11.013	10.71	9.703	9.42	9.596	9.752	9.413	9.613	9.548
BF605426	9.965	11.105	11.93	12.454	12.295	11.969	11.875	11.52	11.669	12.147	10.146	10.848	11.78	12.403	11.582	11.559	12.081	11.539	11.655	11.994
BF606018	7.929	8.289	10.596	9.997	9.254	8.776	9.071	8.582	9.415	10.337	7.851	8.099	9.929	10.539	8.747	8.204	8.732	8.609	9.612	11.007
BF606332	10.592	9.096	7.383	4.689	5.097	4.986	4.932	4.744	4.866	4.907	10.46	9.01	7.62	4.85	4.963	4.903	5.021	4.778	4.953	4.8
BF606691	15.074	15.141	14.257	12.994	12.684	12.517	11.884	11.859	12.003	12.355	15.312	14.628	14.268	13.049	12.875	12.454	12.395	12.297	12.531	12.699
BF651538	4.555	4.763	4.925	4.866	4.409	4.571	4.415	4.669	5.179	5.28	4.939	4.419	4.545	4.976	4.749	4.48	4.735	4.612	5.333	5.378
BF652500	12.234	11.939	14.278	15.071	14.718	14.886	14.862	14.418	14.295	14.752	13.098	13.703	14.218	15.118	14.315	14.824	15.127	14.525	14.469	15.112
BF653052	7.735	7.233	6.386	5.796	5.689	5.918	5.348	5.216	5.538	5.896	7.116	6.79	6.934	6.401	5.697	5.693	5.677	5.577	5.666	6.011
BF653137	13.236	13.329	13.1	11.231	10.958	11.008	11.177	10.685	10.809	10.867	13.245	12.929	12.983	11.498	10.799	10.968	11.175	11.06	11.211	11.22
BF653886	12.88	12.652	12.357	10.714	11.118	10.992	11.416	10.763	10.729	10.85	12.877	12.244	12.406	11.021	10.838	10.948	11.451	10.8	10.982	10.994
BF654005	6.964	5.931	5.202	4.942	4.959	4.957	4.584	4.446	5.22	4.889	7.176	5.751	5.482	5.251	4.624	4.93	4.941	4.699	5.101	4.809
BF654260	11.027	11.853	10.904	8.755	9.391	9.609	9.548	9.303	9.182	9.418	11.163	11.49	11.093	9.655	9.184	9.421	9.667	9.447	9.505	9.417
BF654419	8.761	8.505	7.824	7.143	6.849	6.728	7.108	6.652	6.714	6.925	8.476	8.388	7.777	7.061	6.433	6.611	6.908	6.714	6.704	6.804
BF655076	12.641	12.941	14.014	13.276	13.563	13.767	13.139	12.904	13.021	13.243	12.766	12.841	13.683	13.358	13.376	13.269	13.243	13.026	13.256	13.102
BF655364	6.611	7.318	7.041	7.872	7.528	7.018	6.702	6.783	6.792	7.666	6.808	6.965	6.959	7.259	7.142	6.943	7.364	7.055	7.168	7.821
BF705594	13.833	14.288	13.841	13.504	15.235	15.63	15.678	15.166	15.034	15.376	14.325	13.894	14.207	14.062	14.763	15.291	15.554	15.219	15.013	15.234
BF706678	6.9	7.085	6.736	5.282	5.805	5.999	5.752	5.434	6.302	6.652	7.174	6.773	6.115	6.253	5.302	5.722	5.856	5.759	6.202	6.502
BF773663	4.756	5.204	4.892	5.105	4.865	4.991	4.864	5.147	5.218	5.14	5.215	4.989	4.897	5.422	4.734	4.915	4.932	4.924	5.239	5.143
BF773914	7.304	6.553	7.262	5.902	6.669	6.203	5.358	5.103	5.543	5.916	7.222	6.712	6.875	5.931	6.055	5.493	5.645	4.768	5.399	5.738
BF773936	13.478	13.437	13.036	11.888	12.585	12.657	13.018	12.446	12.317	12.513	13.402	13.125	13.212	12.624	12.358	12.542	13.085	12.472	12.62	12.711
BF774014	9.188	9.596	9.602	10.079	10.774	11.241	11.008	10.775	10.893	11.173	9.414	9.166	9.527	10.324	10.639	10.87	11.008	11.007	11.103	11.207
BF774464	11.585	11.985	11.031	9.743	9.615	9.702	8.983	8.965	9.191	9.141	11.848	11.653	11.222	10.131	9.724	9.646	9.463	9.083	9.602	9.241
BF774480	7.65	7.885	8.221	7.745	8.002	8.015	7.938	7.525	7.557	7.671	8.017	7.71	7.818	8.163	7.969	7.568	7.93	7.581	7.693	7.606
BF775875	10.037	9.911	9.355	6.833	6.84	6.724	6.5	6.71	6.624	7.28	9.806	9.638	9.029	7.096	6.783	6.57	6.569	6.69	6.735	7.268
BF776064	10.426	10.369	9.699	8.266	8.868	8.989	9.037	8.539	8.767	8.82	10.433	9.97	9.754	8.715	8.667	8.845	8.999	8.7	8.806	8.852
BF776183	7.612	7.724	7.654	5.888	6.444	6.027	6.128	6.055	6.086	6.333	7.589	7.207	7.357	6.81	6.19	5.606	6.411	6.097	6.201	6.663
BF776433	6.317	7.264	6.887	6.301	7.863	7.6	8.012	7.506	7.656	7.008	6.71	6.735	6.962	6.906	6.983	6.906	7.69	7.06	7.245	6.795
BF776504	10.226	7.465	5.636	4.925	4.51	4.605	4.471	4.464	5.106	5.054	7.256	5.908	5.375	5.18	4.733	4.562	4.631	4.662	5.188	5.319
BF776575	6.278	6.563	5.917	5.911	5.834	5.834	5.573	5.293	5.669	5.952	6.285	6.298	5.995	5.967	5.441	5.451	5.684	5.704	5.86	5.88
BF776879	9.109	7.867	7.422	6.087	5.904	5.916	5.616	5.386	5.567	5.663	8.911	7.857	7.48	6.485	5.814	5.688	5.921	5.545	5.676	5.683
BF889660	10.904	10.312	9.374	7.636	9.165	8.968	8.474	8.701	8.401	9.067	8.078	8.836	9.722	8.902	9.374	8.926	9.092	9.034	8.966	9.307
BF889733	6.188	6.779	7.55	5.738	6.391	6.471	5.973	5.811	6.263	6.602	7.818	7.929	6.276	6.95	6.06	6.286	6.087	6.336	6.408	6.636
BF890188	7.477	8.386	9.008	8.931	10.548	10.038	10.717	10.144	10.323	10.16	7.709	8.363	9.029	10.359	10.445	10.454	10.468	10.262	10.442	10.547
BFSP1	11.283	9.34	8.71	5.8	6.299	5.836	6.269	5.802	5.764	5.775	10.872	8.504	9.016	7.231	6.701	6.091	6.521	5.897	6.159	6.462
BFSP2	4.91	4.482	4.585	4.462	4.599	4.876	4.549	4.734	4.853	4.886	5.166	4.334	4.479	4.875	4.28	4.641	4.581	4.645	4.863	4.983
BG1	5.676	6.653	5.824	5.339	5.407	5.623	5.051	5.585	5.882	5.832	5.599	5.879	5.955	5.972	5.169	5.596	5.227	5.642	6.208	5.973
BG358207	11.832	12.002	12.093	11.241	12.124	12.483	12.656	12.078	12.166	12.207	11.99	11.831	12.105	12.01	11.975	12.389	12.619	12.219	12.37	12.347
BG358546	9.345	9.36	9.162	8.254	8.383	8.571	8.48	8.361	8.539	9.106	9.356	9.266	8.662	8.673	8.376	8.756	8.739	8.663	8.933	9.21
BG358804	10.869	11.496	14.131	15.457	16.048	16.303	16.036	16.016	15.795	15.826	11.585	13.057	13.871	16.077	16.013	16.133	16.417	16.293	16.097	16.138
BG467079	4.318	7.844	4.689	4.533	6.11	7.004	5.899	6.863	7.851	8.094	4.33	6.868	5.315	4.81	5.325	7.248	6.121	7.618	9.051	8.837
BG467137	12.409	12.118	11.324	10.363	10.486	10.644	10.689	10.45	10.071	10.564	12.424	11.888	11.402	11.131	10.325	10.448	10.618	10.563	10.262	10.544
BG687709	11.586	11.649	11.403	9.049	9.819	10.492	9.64	9.419	9.613	9.773	12.093	11.468	11.205	9.341	9.584	9.861	9.909	9.519	9.941	9.63
BG688352	4.776	4.794	5.038	4.837	5.909	6.126	6.122	5.684	6.305	5.646	4.924	4.562	5.079	4.745	5.972	5.921	5.99	5.494	6.058	5.608
BG689196	12.522	12.009	11.477	10.903	10.559	11.168	10.605	10.672	10.596	11.126	12.417	11.901	11.336	11.857	10.815	11.643	11.183	11.296	11.178	11.533
BG689579	9.972	9.757	9.128	6.879	8.223	8.322	8.677	8.146	8.266	8.595	9.88	9.49	9.223	8.134	8.208	8.292	8.817	8.296	8.603	8.729
BG690692	7.579	7.278	7.046	6.415	6.505	6.408	6.272	6.229	6.116	6.259	7.755	6.961	6.835	6.857	6.286	6.251	6.51	6.453	6.262	6.279
BG690916	7.888	8.242	8.956	6.582	7.454	7.713	6.962	7.394	7.574	7.419	8.02	8.412	8.886	6.59	7.563	7.346	7.728	7.248	8.134	7.212
BG690958	10.523	10.276	9.918	9.956	10.13	9.649	10.473	9.385	9.857	9.635	10.377	10.098	9.876	10.492	9.867	9.807	9.465	9.163	9.624	9.613
BG693855	11.287	11.628	10.272	7.141	7.935	7.909	7.353	7.63	7.812	7.665	11.728	10.949	10.52	7.565	7.766	7.573	7.76	7.575	7.943	7.988
BG937969	10.283	9.992	9.974	7.712	9.087	9.386	9.346	9.073	9.124	9.314	10.348	9.878	9.896	8.08	8.905	9.101	9.22	9.149	8.965	9.071
BGLAP	10.434	11.027	11.337	10.949	11.916	12.044	11.78	11.455	11.524	11.748	10.459	10.809	11.328	11.147	11.701	11.595	11.943	11.491	11.886	11.673
BGN	15.111	14.89	13.244	11.499	11.315	10.933	9.811	10.314	10.933	11.844	15.105	15.156	13.851	11.885	11.184	10.768	10.116	10.447	11.457	12.237
BHLHB2	7.976	10.176	11.307	9.021	11.202	12.302	11.781	12.295	11.996	11.729	8.359	9.784	11.384	9.759	10.73	11.657	12.065	12.477	12.099	11.318
BHLHB3	7.335	8.028	8.312	9.587	10.18	11.019	11.164	10.937	11.155	11.075	7.523	7.644	8.325	9.824	9.966	10.9	10.672	10.77	11.206	10.834
BHLHB4	5.969	6.142	6.555	6.372	6.066	6.242	5.911	5.837	6.277	6.167	6.183	5.905	6.282	6.406	5.892	5.941	6.12	6.078	6.348	6.384
BHLHB5	8.592	5.188	6.302	4.443	5.213	5.433	5.12	5.072	4.736	5.058	5.391	5.017	5.777	5.171	5.462	5.03	5.177	5.28	4.676	4.901
BHLHB9	10.296	10.11	9.952	8.762	9.319	9.462	9.198	9.337	9.121	9.655	10.101	9.795	9.932	9.239	9.262	9.256	9.427	9.369	9.328	9.772
BHMT	5.134	4.768	4.957	4.653	5.125	5.361	4.626	4.553	4.51	4.648	4.937	4.678	4.415	4.738	4.839	4.964	5.053	4.839	4.591	4.536
BHMT2	5.403	6.723	5.667	4.844	5.195	5.409	4.993	5.357	6.515	6.189	5.796	5.586	5.417	5.513	4.612	5.069	5.052	5.516	7.187	6.637
BI534479	10.696	10.381	9.945	9.902	10.406	10.522	11.005	10.354	10.689	10.531	10.47	10.313	10.187	10.597	10.306	10.39	10.844	10.323	10.774	10.617
BI534528	10.75	10.12	9.749	8.538	8.605	7.533	7.194	7.28	7.339	7.394	10.392	9.947	9.513	8.716	7.884	7.279	7.35	7.59	7.418	7.695
BI534559	9.681	10.805	10.977	12.102	11.633	11.696	11.68	11.216	11.035	11.897	9.856	10.614	10.807	11.714	11.333	11.32	11.776	11.267	11.403	11.994
BI534589	11.292	11.381	10.478	9.147	9.394	9.548	9.831	9.365	9.099	9.888	11.191	11.031	10.65	9.423	9.307	9.395	9.856	9.468	9.398	10.002
BI534730	9.916	8.678	8.115	4.611	5.687	6.01	4.722	5.722	6.11	5.776	9.801	9.006	8.324	5.372	5.509	5.856	5.182	5.543	6.487	5.982
BI534825	5.291	5.403	5.848	5.443	5.082	5.135	4.844	4.797	5.125	5.207	5.783	5.176	5.227	5.537	4.783	5.152	5.012	4.977	5.162	5.013
BI534914	4.232	5.213	4.26	4.222	4.655	4.542	4.303	4.462	4.707	4.496	5.154	4.789	4.78	5.319	4.548	4.871	4.48	4.721	4.491	4.813
BI535011	5.398	5.516	4.661	4.525	4.597	4.565	4.577	4.317	4.774	5.006	5.537	4.919	4.906	4.723	4.252	4.456	4.433	5.021	4.938	5.163
BI535188	11.797	11.587	11.289	10.951	10.779	10.669	10.875	10.373	10.265	10.226	11.834	11.629	11.368	11.126	10.483	10.453	10.84	10.576	10.559	10.272
BI535218	9.515	9.527	8.98	7.985	8.827	9.075	9.057	8.561	8.647	8.668	9.587	9.304	8.783	8.404	8.522	8.702	9.046	8.409	8.628	8.506
BI535295	11.816	11.129	10.608	11.18	12.004	12.163	11.751	11.643	11.864	11.923	11.311	10.636	10.657	11.582	12.036	11.881	11.848	11.889	12.119	11.941
BI535772	9.89	8.473	6.522	4.745	4.703	4.645	4.289	4.679	4.514	4.607	8.823	7.532	6.666	5.01	4.627	4.597	4.657	4.966	4.669	4.756
BI535816	8.707	8.032	7.428	4.556	4.791	4.834	5.227	4.636	5.687	5.273	8.839	7.844	7.222	4.818	4.451	4.698	5.146	4.738	5.713	5.118
BI535857	7.553	4.882	5.879	5.22	5.924	5.996	6.073	5.305	6.21	5.924	6.255	4.445	5.41	5.937	5.445	5.545	5.862	5.51	5.955	5.529
BI536018	10.264	7.556	6.056	4.769	4.804	4.557	4.455	4.751	4.568	4.9	9.001	6.572	5.873	4.535	4.678	4.738	4.762	4.882	4.68	5.015
BI536274	13.529	12.816	11.869	7.78	9.763	9.52	9.305	9.435	9.365	9.193	13.668	12.523	12.067	9.014	9.625	9.432	9.864	9.616	9.796	9.315
BI536584	8.07	7.74	7.039	5.52	6.731	6.145	6.943	6.44	7.754	6.7	7.72	7.453	6.892	6.474	6.542	5.832	7.402	6.717	8.224	6.771
BI537502	11.097	10.512	9.695	10.089	10.132	9.825	10.063	9.281	9.382	9.763	10.995	10.284	9.951	10.972	9.949	9.617	9.794	9.522	9.719	9.897
BI537557	8.569	9.683	9.736	8.226	8.918	8.955	8.591	8.388	8.875	8.923	8.68	9.197	9.923	8.641	9.279	9.093	8.954	8.734	9.051	9.104
BI537572	10.138	9.92	9.039	6.543	7.318	7.324	7.603	7.299	7.022	7.331	10.069	9.763	9.192	7.421	7.175	7.216	7.586	7.615	7.279	7.423
BI537887	11.795	11.284	11.445	8.974	10.426	10.85	10.494	10.301	10.309	10.055	12.145	11.572	11.613	9.56	10.524	10.675	10.72	10.342	10.483	9.826
BI538400	9.709	9.265	8.957	6.342	6.523	5.642	6.568	5.824	5.924	6.091	9.999	9.838	8.594	6.792	6.038	5.417	6.347	5.958	6	6.044
BI538482	5.81	5.764	5.516	4.717	5.624	5.703	5.691	5.227	5.568	5.678	5.924	5.553	5.22	5.371	5.324	5.431	5.513	5.308	5.507	5.516
BI538600	11.05	10.837	10.368	11.112	10.862	11.307	11.277	11.16	10.973	11.418	10.881	10.672	10.509	11.334	10.924	11.217	11.327	11.426	11.206	11.52
BI538691	4.846	4.879	5.253	4.85	5.219	5.334	4.683	4.909	5.192	5.016	4.877	4.677	4.832	5.107	4.845	5.013	4.994	5.002	5.132	5.143
BI538754	10.504	10.746	10.923	8.584	8.872	9.436	8.867	8.769	9.149	9.569	11.023	10.884	10.941	8.945	8.997	9.165	9.071	8.905	9.413	9.592
BI538891	4.957	5.329	5.533	5.154	5.257	5.107	4.879	5.084	5.537	5.419	5.362	4.894	5.139	5.614	5.026	4.806	5.072	5.226	5.627	5.318
BI538914	9.151	8.728	8.318	6.006	8.145	9.061	9.131	8.918	8.815	8.882	8.745	8.659	8.469	6.78	8.304	9.094	9.348	9.36	9.273	9.051
BI539175	11.611	11.493	10.692	9.82	9.242	9.187	9.45	9.274	9.074	9.713	11.613	11.38	10.85	9.945	9.105	9.279	9.471	9.28	9.195	9.732
BI539792	8.996	6.91	5.309	5.676	5.687	4.669	4.497	4.519	5.181	5.193	7.752	6.599	5.969	5.716	5.008	4.651	4.465	4.858	5.268	5.432
BI539865	5.102	4.411	4.56	4.46	4.375	5.36	4.67	4.897	4.618	4.597	5.019	4.336	4.46	4.475	4.495	5.647	4.854	4.783	4.744	4.809
BI539870	11.272	10.761	10.602	9.077	10.4	10.568	10.789	10.207	10.245	10.418	11.184	10.939	10.55	9.508	10.025	10.22	10.819	10.032	10.375	10.277
BI539883	8.963	9.829	10.195	9.64	10.595	10.908	10.361	10.671	10.301	10.721	9.14	9.48	10.154	10.495	10.661	10.577	10.691	11.051	10.475	10.938
BI540020	9.873	10.502	10.663	6.364	8.896	8.933	7.393	9.139	9.317	9.805	10.438	10.644	10.473	6.658	8.204	8.587	7.858	9.063	9.356	9.552
BI540038	12.151	12.803	12.698	11.091	11.674	11.815	11.806	11.575	11.44	11.989	12.353	12.466	12.541	11.634	11.487	11.747	12.036	11.633	11.704	11.998
BI540524	12.671	12.53	11.973	11.257	11.346	11.544	11.761	11.226	11.091	11.749	12.68	12.33	12.133	11.389	11.115	11.386	11.696	11.336	11.31	11.918
BI540599	14.119	13.973	12.422	10.256	11.228	11.652	11.619	11.397	11.676	11.883	14.356	13.548	12.972	11.17	11.339	11.666	11.9	11.781	12.006	11.961
BI541292	11.45	11.683	11.044	8.512	8.639	8.249	8.516	8.108	7.893	8.653	11.696	11.122	10.696	9.132	8.181	7.904	8.557	8.153	8.014	8.714
BI541578	12.95	12.561	11.235	10.003	10.19	10.199	10.146	9.835	9.985	10.542	12.746	11.967	11.549	9.862	10.111	9.897	10.25	9.732	10.156	10.501
BI541727	10.325	9.621	8.722	7.299	7.317	7.321	7.15	6.72	6.824	6.593	10.448	9.626	9.16	7.779	7.46	7.277	7.308	7.026	7.072	6.904
BI541857	4.529	4.481	4.772	4.428	4.372	4.651	4.575	4.688	4.664	4.507	4.567	4.528	4.695	4.634	4.399	4.367	4.765	4.577	4.369	4.514
BI542041	4.441	4.45	4.797	4.514	5.012	4.667	4.598	4.36	4.613	4.825	4.595	4.616	4.866	4.586	4.678	4.653	4.746	4.296	4.515	4.851
BI542267	8.875	8.8	8.633	5.865	6.582	7.105	7.424	6.966	7.17	7.283	8.474	8.518	8.471	6.85	6.579	7.178	7.428	7.243	7.347	7.522
BI679929	6.177	8.345	6.354	6.409	6.367	6.586	6.13	5.989	6.381	6.941	8.134	7.521	6.223	6.659	6.197	6.474	6.959	6.301	6.667	6.92
BI680186	10.37	10.339	10.609	10.252	10.157	10.175	9.84	9.476	9.392	10.133	10.433	10.144	10.081	10.245	9.779	9.806	10.059	9.658	9.629	9.985
BI680440	11.813	11.56	11.839	12.087	11.955	11.613	11.832	11.303	11.094	11.582	11.846	11.451	11.98	11.829	11.52	11.349	11.805	11.375	11.382	11.87
BI680570	8.82	6.511	7.532	4.452	5.04	5.332	4.688	5.293	5.308	5.374	6.521	6.384	7.26	4.841	5.131	5.173	5.085	4.701	5.534	5.157
BI680613	9.705	9.927	8.803	7.583	8.113	7.912	8.091	7.712	7.378	8.055	9.407	9.419	9.212	8.622	7.697	7.653	8.246	7.835	7.549	8.046
BI680682	8.75	9.191	7.647	6.817	8.889	8.336	7.153	7.571	6.604	8.57	7.912	7.877	7.615	7.037	7.828	7.544	6.949	7.07	6.486	8.803
BI680811	11.166	11.829	11.803	11.82	12.309	12.686	12.638	12.405	12.268	12.447	11.252	11.435	11.816	12.227	12.247	12.525	12.732	12.511	12.474	12.632
BI681035	12.697	12.001	12.71	11.58	12.681	13.039	12.726	12.419	12.474	12.701	12.086	11.999	12.328	12.385	12.511	12.772	12.867	12.534	12.791	12.645
BI681058	10.036	11.196	11.132	11.614	11.842	11.895	11.81	11.821	12.11	12.084	10.555	10.724	11.102	11.845	11.826	11.705	12.37	11.901	12.514	12.3
BI681172	11.442	11.509	10.673	7.653	8.863	8.45	8.47	8.331	8.139	8.126	11.232	11.168	11.135	8.494	8.771	8.47	8.719	8.411	8.536	8.376
BI681293	9.932	10.235	9.609	10.454	10.608	10.941	10.756	10.654	10.546	11.052	9.983	9.919	9.774	11.099	10.59	10.899	10.599	10.815	10.784	11.097
BI682802	8.196	5.801	4.339	4.462	5.102	4.927	4.528	5.125	4.67	4.608	5.489	5.457	4.339	5.031	4.666	4.37	4.76	5.255	4.911	5.4
BI683137	6.145	6.112	6.196	5.485	5.738	5.78	5.673	5.549	5.348	5.533	6.452	5.974	5.876	6.048	5.436	5.45	5.506	5.712	5.479	5.471
BI683199	10.188	10.651	10.63	10.694	10.911	11.13	11.125	10.755	10.963	11.297	10.432	10.595	10.504	11.115	10.904	10.977	11.105	10.918	11.227	11.422
BI683411	6.274	6.589	6.843	6.734	6.601	6.638	6.307	6.206	6.311	6.711	6.628	6.452	6.63	6.959	6.206	6.251	6.534	6.446	6.599	6.6
BI773835	13.254	12.75	12.01	9.013	9.863	9.714	9.673	9.34	9.178	9.24	13.239	12.412	12.064	9.543	9.884	9.465	10.197	9.444	9.619	9.402
BI774268	12.411	12.296	11.2	8.787	9.879	10.007	9.702	9.405	9.41	9.908	12.707	11.947	11.405	9.696	9.989	10.015	9.804	9.608	9.872	10.22
BI774334	5.833	5.785	5.962	5.638	5.978	5.941	6.107	5.489	5.954	5.973	6.032	5.649	5.837	5.821	5.767	5.749	6.081	5.738	6.154	5.965
BI774772	8.961	8.638	7.981	8.581	7.4	6.948	6.446	6.001	6.354	7.174	9.161	8.686	7.941	8.184	7.347	6.771	6.438	6.186	6.649	7.729
BI774842	9.509	10.301	9.748	10.414	9.632	9.741	10.318	8.838	8.855	9.173	9.763	9.807	9.71	10.708	9.565	9.369	9.831	9.166	9.194	9.52
BI775097	7.768	8.005	8.978	6.332	6.742	6.593	6.25	6.166	6.241	6.502	7.925	8.619	8.6	6.678	6.527	6.311	6.454	6.254	6.353	6.559
BI775810	10.053	9.041	8.363	7.221	6.839	6.781	6.698	6.682	6.659	6.83	9.164	9.036	8.876	7.368	6.803	6.864	6.583	6.645	6.892	7.433
BI775893	8.693	8.487	9.871	11.106	12.52	12.345	11.608	12.004	12.6	12.618	9.398	8.881	9.899	11.851	12.447	12.189	12.26	12.619	13.247	12.9
BI775909	6.176	5.944	5.918	5.621	5.94	6.349	5.806	5.718	5.953	5.981	6.196	5.627	5.79	5.964	5.776	6.012	6.436	5.933	6.249	6.039
BI776188	6.145	6.192	5.937	6.104	6.775	7.212	6.658	6.545	6.767	7.13	6.244	5.954	5.922	7.033	6.59	6.881	6.939	7.079	7.191	7.361
BI847429	7.065	6.924	6.783	5.042	6.584	6.789	6.634	6.126	6.313	6.601	7.085	6.975	6.643	6.228	6.162	6.388	6.707	6.128	6.498	6.869
BI847554	5.058	5.285	5.186	4.95	5.128	5.482	4.859	4.961	5.307	5.476	5.469	4.914	4.897	5.089	4.925	5.069	5.276	5.146	5.216	5.29
BI847601	12.442	13.219	12.759	11.653	11.444	11.314	12.142	11.298	11.419	11.674	12.386	12.785	12.729	12.018	11.217	11.123	11.883	11.485	11.759	11.861
BI848451	9.422	9.377	8.864	8.14	8.976	9.132	8.928	8.752	8.985	9.475	9.46	9.1	8.718	8.805	8.531	8.946	8.897	9.008	9.161	9.507
BI848620	8	7.917	7.583	7.12	7.952	8.345	7.583	7.352	7.479	7.899	8.216	7.885	7.651	7.722	7.802	7.909	7.767	7.495	7.789	7.957
BI848637	11.438	12.141	12.129	11.765	11.63	11.779	11.261	10.843	10.983	11.27	11.606	11.952	11.938	11.83	11.5	11.321	11.467	11.08	11.365	11.242
BI848789	12.946	12.882	15.16	15.157	15.107	15.064	15.024	14.802	14.584	14.862	13.485	14.399	14.559	15.303	15.003	14.91	14.937	15.062	14.643	14.79
BI849141	11.3	10.784	10.604	7.453	8.121	7.957	7.89	7.969	8.236	7.765	11.205	10.586	10.552	7.29	8.198	7.988	8.386	8.117	8.562	8.141
BI849329	12.633	13.566	14.686	14.81	15.25	15.655	15.513	15.232	15.133	15.465	12.943	14.349	14.309	14.824	14.71	15.095	15.472	15.27	15.29	15.264
BI849462	8.011	7.977	8.086	5.722	6.807	7.01	7.4	6.516	6.844	6.569	8.171	8.018	7.977	6.657	6.845	6.701	7.294	6.446	6.975	6.76
BI849774	9.666	10.624	10.863	9.962	9.87	9.997	9.74	8.856	8.351	8.521	9.543	10.422	11.209	10.672	10.25	9.654	9.457	8.8	8.783	8.483
BI849974	11.959	12.307	11.732	9.238	10.095	10.652	10.907	10.586	10.386	10.71	12.212	12.105	11.776	9.8	10.122	10.704	11.096	10.59	10.726	10.673
BI898055	7.053	6.5	6.171	4.967	6.152	6.289	6.325	5.633	5.789	6.153	6.849	6.517	5.901	5.733	6.001	6.016	6.352	5.869	5.816	6.213
BI898465	11.727	11.416	11.627	11.153	10.609	10.761	11.562	10.766	10.452	10.628	11.494	11.293	11.563	10.804	10.333	10.751	11.693	10.606	10.862	10.841
BI898777	11.809	11.523	10.831	8.001	9.363	9.268	9.28	8.868	9.154	9.274	12.078	11.396	10.672	8.814	9.286	9.048	9.466	8.984	9.328	9.416
BI898799	7.255	7.784	7.61	6.123	6.359	6.954	6.015	6.093	6.335	6.676	7.197	7.465	7.424	6.553	5.91	6.648	6.369	6.428	6.431	6.791
BI898834	6.815	6.415	6.549	6.504	6.584	6.532	6.288	6.107	6.3	6.399	6.537	6.06	6.225	6.793	6.14	6.166	6.395	6.332	6.357	6.376
BI899130	12.04	11.755	10.992	10.378	10.387	10.118	10.002	9.91	10.085	10.422	11.969	11.237	11.126	11.065	10.248	10.426	9.954	10.321	10.358	10.661
BI899213	10.708	11.189	11.047	9.543	10.028	10.397	10.219	10.206	10.444	10.513	11.055	10.715	11.157	10.481	10.317	10.398	10.708	10.599	10.758	10.859
BI975434	4.766	4.668	4.675	4.705	4.68	4.888	4.759	4.614	4.796	4.963	4.653	4.8	4.554	4.892	4.772	4.858	4.708	4.886	4.856	4.91
BI975573	11.865	11.737	11.229	12.256	12.438	12.133	12.242	10.922	10.579	10.581	11.715	11.061	10.991	11.955	11.396	11.498	12.184	10.698	10.943	10.851
BI975817	8.931	8.979	8.911	7.966	8.479	8.927	8.305	7.942	8.358	8.726	8.962	8.759	8.504	8.395	8.386	8.597	8.518	8.151	8.628	8.687
BI976038	10.387	10.479	10.094	10.988	10.262	9.978	10.159	9.253	9.84	9.369	10.302	9.994	9.788	11.014	10.04	9.818	9.927	9.416	9.847	9.411
BI976302	7.707	8.011	7.437	6.034	6.981	6.748	6.674	6.645	6.538	7.097	7.569	7.49	7.288	6.781	6.395	6.152	6.766	6.588	6.703	6.901
BI976622	12.606	12.455	11.727	11.359	11.045	10.877	11.199	10.863	10.858	11.789	12.484	12.169	11.961	11.496	10.917	10.943	11.214	11.154	11.177	12.145
BI976749	4.443	4.332	4.402	5.136	5.158	5.342	4.794	4.893	4.901	5.46	4.412	4.323	4.532	4.899	5.165	5.093	5.079	5.012	5.067	5.672
BI977025	12.524	12.01	12.486	10.649	11.242	11.589	11.715	11.2	11.028	10.952	12.989	12.658	12.588	11.2	11.225	11.522	12.01	11.189	11.406	10.988
BI977073	6.978	6.647	6.51	5.679	6.762	6.967	7.011	6.659	6.78	7.177	6.851	6.36	6.396	6.671	6.571	6.353	7.459	7.064	6.842	7.097
BICD1	7.429	6.714	6.703	6.13	6.555	6.446	6.587	6.494	6.636	6.761	7.073	6.631	6.681	6.14	6.151	6.095	6.37	6.449	6.485	6.699
BIK	6.111	6.672	5.892	4.602	4.721	4.534	4.643	4.428	4.838	4.943	5.999	5.963	5.615	4.812	4.684	4.363	4.878	4.686	4.915	5.071
BIN1	7.933	8.498	9.191	9.279	8.997	9.357	9.38	9.266	9.358	9.463	8.666	8.283	8.928	9.063	8.867	9.558	9.577	9.337	9.283	9.349
BIN2	5.782	5.824	5.345	4.747	5.503	5.441	5.125	5.048	5.673	5.309	5.789	5.684	5.344	5.038	5.401	5.247	5.216	5.19	5.505	5.383
BIN3	11.785	12.184	11.541	10.959	10.236	9.789	10.165	9.689	9.994	10.431	11.961	11.768	11.508	10.947	9.999	9.877	9.628	9.74	10.018	10.571
BIRC1	4.958	4.966	5.231	5.099	5.775	5.462	5.605	5.338	5.293	5.253	5.055	4.495	4.92	5.509	5.575	5.316	5.401	5.288	5.303	5.356
BIRC3	10.569	10.788	10.402	8.992	9.862	9.834	10.413	9.832	10.02	9.988	10.473	10.649	10.53	9.743	9.699	10.006	10.141	9.93	10.124	10.723
BIRC4BP	6.943	7.353	8.165	6.644	8.869	8.724	8.788	7.971	8.186	7.907	6.73	6.708	7.507	7.249	8.826	8.862	8.355	7.928	8.011	7.8
BIRC5	8.665	8.03	7.746	5.173	6.127	6.366	5.67	6.029	6.322	6.149	8.749	7.901	7.567	5.555	6.116	6.025	6.006	6.125	6.504	6.249
BIRC7	6.433	6.821	6.92	6.949	6.352	6.486	6.264	6.154	6.307	6.485	6.839	6.644	6.852	7.034	6.278	6.095	6.401	6.295	6.481	6.586
BIT1	10.359	10.653	10.161	10.126	10.603	10.646	10.799	10.342	10.399	10.879	10.618	10.391	10.118	11.156	10.428	10.46	10.764	10.482	10.659	10.895
BIVM	9.45	9.321	8.789	7.894	8.358	8.494	8.129	7.837	7.885	8.316	9.419	9.276	8.884	8.34	8.154	8.209	8.462	8.103	8.255	8.48
BLCAP	9.811	9.85	9.78	9.18	9.542	10.13	10.175	9.64	9.713	10.046	9.996	10.06	9.571	9.365	9.363	9.927	10.169	9.738	9.989	10.156
BLK	4.26	5.344	5.24	4.69	5.499	5.721	6.366	5.622	5.837	5.323	4.633	4.896	5.786	4.953	5.785	5.299	6.15	5.917	5.718	5.445
BLM	6.428	5.731	5.632	4.65	5.105	5.629	4.736	4.763	5.317	5.658	6.476	5.734	5.445	4.777	4.982	5.012	5.318	4.836	5.32	5.319
BLMH	13.352	13.644	13.354	13.825	13.866	14.098	13.931	13.689	13.709	14.032	13.539	13.279	13.356	14.454	13.782	14.079	13.855	13.822	13.808	14.101
BLNK	5.876	6.136	5.033	4.429	4.796	5.187	4.991	4.761	5.453	5.21	6.09	5.632	5.418	4.804	4.876	4.802	5.168	4.769	5.37	5.063
BLOC1S1	12.167	13.026	13.068	13.321	13.733	13.95	13.608	13.256	13.296	13.755	12.426	12.783	12.997	13.771	13.429	13.552	13.623	13.376	13.574	13.667
BLOC1S2	11.83	12.154	12.065	12.525	12.178	12.254	12.255	11.917	12.203	12.826	11.903	12.094	12.016	13.106	12.134	12.203	12.165	12.07	12.304	12.997
BLR1	4.906	5.147	4.914	4.482	4.5	4.479	4.418	4.636	4.48	4.44	5.269	4.664	4.815	4.977	4.733	4.826	4.876	4.704	4.715	4.565
BLVRA	7.791	7.895	7.908	5.966	7.03	7.335	7.148	6.887	7.294	7.291	7.949	7.676	7.991	6.698	6.993	7.313	7.572	7.188	7.417	7.414
BLVRB	10.768	11.644	10.421	11.712	12.288	12.651	12.532	12.292	12.458	12.979	10.906	10.617	10.448	12.262	12.311	12.657	12.738	12.66	13.048	13.268
BLZF1	8.831	9.316	9.559	9.304	9.826	10.124	10.124	9.442	9.267	9.888	9.215	9.283	9.44	9.854	9.512	9.768	9.982	9.494	9.454	9.908
BM030529	8.132	8.761	8.539	9.08	9.022	8.865	8.882	8.623	8.566	9.333	8.398	8.43	8.697	8.62	9.063	9.226	9.208	8.805	8.918	9.364
BM030594	6.501	6.537	8.009	7.301	6.914	7.123	6.188	6.595	6.187	6.993	6.783	6.635	7.581	7.246	6.778	6.789	6.712	6.687	6.635	7.145
BM030612	5.986	6.089	6.259	5.868	5.903	5.865	5.485	5.417	5.661	5.618	6.23	5.61	5.991	6.24	5.652	5.522	5.647	5.676	5.703	5.743
BM030716	9.079	8.819	9.07	5.881	7.757	8.075	7.597	7.675	7.484	7.672	9.056	9.011	8.939	7.485	7.681	7.872	8.267	7.905	8.201	7.822
BM030907	11.869	12.312	11.669	10.008	10.194	10.185	10.974	9.923	10.285	10.488	12.13	11.556	11.414	10.296	9.701	10.027	10.774	9.855	10.468	10.603
BM031003	11.016	11.53	11.521	8.967	9.633	9.889	9.657	9.172	9.458	9.344	11.122	11.165	11.4	9.079	9.721	9.522	10.131	9.251	9.883	9.299
BM031304	8.29	8.457	8.186	8.537	8.804	9.118	8.538	8.419	8.567	8.862	8.578	7.863	8.056	8.667	8.785	8.792	8.706	8.673	8.892	8.817
BM031409	12.574	13.048	12.652	12.466	12.777	13.114	12.738	12.875	13.01	13.47	12.723	12.615	12.742	12.797	12.532	12.902	12.794	12.955	12.968	13.28
BM031770	5.75	6.418	6.693	6.55	6.849	6.347	6.652	6.049	6.415	6.38	6.03	6.087	6.387	6.993	6.546	5.97	6.776	6.002	6.356	6.139
BM031914	6.726	6.709	6.976	6.232	6.163	6.093	6.105	5.942	5.839	6.234	6.978	6.576	6.563	6.669	5.868	5.912	6.228	6.308	6.101	6.056
BM086789	11.372	11.338	11.006	11.82	12.053	12.276	12.363	11.853	11.799	12.33	11.472	11.342	11.062	11.332	11.696	11.97	12.373	12	12.034	12.399
BM086898	5.535	7.045	6.175	5.796	4.906	5.105	5.542	4.746	4.957	5.354	4.862	6.67	5.203	5.075	4.422	4.584	5.225	4.69	4.798	5.479
BM087146	7.655	7.15	7.099	5.73	6.229	6.851	5.951	5.535	6.009	5.764	7.73	7.006	6.835	6.111	5.78	6.065	5.624	5.53	6.174	5.452
BM087726	11.24	11.624	11.02	10.427	10.13	10.498	10.471	10.164	10.484	10.983	11.477	11.194	11.088	10.362	9.849	10.294	10.242	10.221	10.509	11.004
BM087744	10.474	10.448	9.899	7.605	7.624	7.949	8.166	7.686	7.533	8.389	9.943	9.442	9.715	8.259	7.408	7.603	7.876	7.807	7.614	8.319
BM087770	4.972	6.442	12.323	12.385	13.612	13.958	14.14	13.65	13.643	13.51	4.975	6.785	12.119	12.558	13.234	13.68	14.727	13.592	13.872	13.952
BM088835	10.308	10.693	10.505	9.212	10.619	10.94	10.428	10.554	10.956	11.332	10.623	10.404	10.229	9.781	10.359	10.531	10.326	10.647	11.105	11.15
BM088860	5.874	5.424	5.94	5.929	4.719	5.059	6.361	4.608	5.102	5.587	5.908	5.308	5.252	6.334	4.645	4.729	5.827	4.8	5.011	5.441
BM089117	5.046	5.023	4.787	4.828	4.667	4.521	4.535	4.497	4.665	4.72	5.401	4.951	4.531	4.819	4.285	4.692	4.677	4.948	4.746	4.928
BM089844	6.207	6.084	6.286	6.408	6.202	6.186	5.973	5.665	5.525	5.77	6.345	5.982	6.085	6.338	5.915	5.778	6.191	5.725	5.769	5.82
BM089961	12.101	11.703	10.494	6.954	7.894	7.979	7.73	7.772	8.064	7.919	11.808	11.119	10.637	6.967	8.083	7.779	8.3	7.867	8.346	8.245
BM090211	10.045	10.694	10.145	8.228	8.962	9.02	8.825	8.452	8.217	8.487	10.255	10.619	9.949	8.647	8.581	8.632	8.892	8.626	8.442	8.419
BM090226	7.997	7.782	7.472	6.407	7.179	7.467	7.223	6.882	7.008	7.218	8.032	7.963	7.778	7.211	6.991	7.212	7.307	7.003	7.225	7.379
BM090260	6.163	6.156	6.083	4.773	5.021	4.714	4.578	4.753	4.955	4.985	6.405	5.844	5.946	5.293	4.762	4.836	4.976	4.946	5.297	4.933
BM090266	6.554	6.965	6.957	6.023	5.201	4.854	5.812	4.991	4.914	5.1	6.66	6.737	7.01	6.165	4.752	4.618	4.982	4.934	4.779	4.837
BM090411	11.201	12.188	10.858	7.503	8.33	8.26	8.287	8.035	8.27	8.318	11.421	11.762	10.654	7.748	8.278	8.141	8.617	8.095	8.683	8.642
BM090475	10.182	10.493	10.056	8.924	9.627	9.938	9.954	9.39	9.393	9.493	10.018	10.154	9.936	9.439	9.349	9.649	9.808	9.538	9.637	9.469
BM104759	9.392	9.47	8.864	5.542	6.27	6.554	6.326	6.275	6.236	6.249	9.688	9.384	8.572	6.525	5.863	6.403	6.336	6.503	6.132	6.333
BM104949	11.698	11.956	11.674	10.645	11.154	11.795	11.423	11.099	11.128	11.338	11.875	11.681	11.667	11.363	10.947	11.672	11.531	11.245	11.342	11.474
BM104990	11.342	11.773	11.402	10.913	11.041	11.222	11.123	10.638	10.598	11.128	11.574	11.293	11.317	11.245	10.693	10.95	11.081	10.811	10.738	11.179
BM105035	7.765	7.001	6.259	5.497	5.235	5.209	5.537	5.25	5.086	5.53	7.444	6.871	6.608	5.661	5.21	4.829	5.577	5.158	5.235	5.6
BM105227	6.458	6.872	6.429	5.546	5.727	5.661	6.654	5.343	5.383	5.778	6.634	6.702	6.834	5.989	5.457	5.481	6.748	5.497	5.476	6.085
BM105326	10.099	10.069	9.439	7.745	8.457	8.319	8.61	7.883	7.934	8.316	9.879	9.906	9.729	8.285	8.454	8.136	8.683	7.969	8.201	8.479
BM106154	9.452	8.505	7.369	4.37	4.84	4.774	4.46	4.497	5.341	4.511	9.669	8.099	7.096	4.667	4.797	4.573	4.64	4.73	4.951	4.552
BM106714	10.797	10.16	9.839	7.416	7.687	8.019	7.431	8.066	7.774	7.983	10.651	10.333	10.155	8.321	8.054	7.814	8.307	8.404	8.213	8.406
BM106981	8.415	7.541	6.453	4.718	4.604	4.996	4.906	4.594	4.934	4.903	7.247	7.373	6.649	5.295	4.886	4.932	5.255	4.513	5.182	5.241
BM107422	10.581	11.858	11.321	7.116	8.881	8.578	8.817	8.499	9.046	8.479	11.089	11.858	11.269	7.72	8.97	8.608	9.329	8.642	9.332	8.791
BM107566	9.273	8.637	8.365	5.998	6.834	7.071	7.126	6.542	6.64	6.641	9.348	8.186	8.402	6.491	6.402	6.547	6.939	6.673	6.661	6.485
BM107669	10.415	9.891	10.064	10.285	10.674	11.064	11.061	10.559	10.628	10.974	10.024	9.805	9.979	10.443	10.446	10.668	11.046	10.698	10.896	10.981
BM251291	12.087	13.517	13.235	12.601	11.896	11.661	11.224	10.937	10.782	11.227	12.502	13.015	13.003	12.239	12.01	11.806	11.757	10.842	11.134	11.56
BM251374	8.171	8.572	8.528	6.438	7.378	7.414	6.818	6.762	7.037	7.18	8.3	8.207	8.441	6.987	7.419	7.208	7.362	7.03	7.407	7.319
BM251391	6.676	6.635	6.247	5.064	5.532	5.548	5.506	4.978	5.222	5.203	6.881	6.35	6.192	5.084	5.076	5.193	5.55	5.066	5.027	5.338
BM251424	5.282	5.931	5.898	5.387	5.395	4.92	5.055	4.579	4.977	5.224	5.704	6.075	5.931	6.297	5.44	4.855	5.25	4.829	5.176	5.451
BM251595	5.881	6.283	6.02	5.68	6.372	6.588	6.178	6.169	6.444	6.776	6.131	5.877	5.982	5.998	6.054	6.155	6.579	6.237	6.631	6.889
BM251685	9.388	9.022	9.022	6.627	7.865	7.76	6.961	7.317	7.478	7.798	8.928	9.016	8.644	7.628	7.494	7.498	7.655	7.419	7.667	7.852
BM252006	13.516	13.68	13.658	13.225	13.265	13.394	13.19	12.643	12.456	12.897	13.807	13.462	13.742	13.561	13.091	13.22	13.115	12.633	12.679	13.006
BM252119	12.805	13.461	12.867	12.518	12.169	12.123	12.379	11.816	11.912	11.883	13.06	12.987	13.078	12.534	11.729	11.976	12.292	11.758	12.07	12.25
BM253126	7.533	7.243	7.041	6.206	6.723	7.074	6.84	6.787	6.637	7.134	7.369	7.219	6.944	6.878	6.33	6.862	6.853	7.216	6.713	7.162
BM253131	9.21	10.298	10.778	11.201	11.822	12.827	13.151	12.519	12.32	12.53	9.354	10.667	10.86	11.555	11.547	12.307	13.266	12.635	12.636	12.543
BM253342	7.29	7.695	7.551	6.406	6.529	6.405	6.551	6.439	6.481	6.486	7.684	7.5	7.408	7.064	6.555	6.461	6.806	6.71	6.781	6.76
BM253370	10.478	10.625	10.191	8.958	9.66	9.811	9.603	9.623	9.608	9.901	10.245	10.166	9.991	9.39	9.849	9.865	9.798	9.76	9.798	10.199
BM253482	11.244	11.282	10.908	8.868	9.687	9.988	9.887	9.534	9.888	10.367	11.272	10.739	11.074	9.679	9.789	9.996	10.117	9.756	10.327	10.712
BM253537	10.843	11.753	12.147	11.523	11.789	11.07	10.914	11.177	10.864	11.589	11.206	11.782	12.339	11.865	11.889	10.761	10.994	11.572	10.952	11.739
BM253627	6.72	6.65	6.53	5.206	5.512	5.724	5.083	5.088	5.563	5.593	6.676	6.449	6.202	5.619	5.533	5.499	5.673	5.298	5.625	5.432
BM253720	10.91	10.76	10.4	8.75	9.089	9.165	8.65	8.337	8.5	8.739	10.807	10.43	10.549	9.007	9.255	8.979	8.997	8.816	8.962	9.078
BM254386	6.207	6.156	7.417	4.587	5.387	5.363	5.433	5.088	5.441	5.424	6.391	6.016	7.204	4.941	5.111	5.327	5.485	5.426	5.459	5.544
BM254587	12.64	12.59	12.469	10.321	11.02	11.254	11.168	10.87	10.569	11.015	12.805	12.307	12.536	10.961	10.924	11.104	11.255	11.125	10.902	11.172
BM254664	8.992	8.63	8.196	7.74	7.134	7.199	7.251	6.948	6.977	7.473	9.385	8.553	8.578	8.159	7.324	7.51	7.25	7.411	7.452	8.044
BM254679	10.899	11.373	10.668	8.564	8.353	8.429	8.042	7.772	7.845	8.257	11.212	11.118	11.008	8.833	8.312	8.386	8.39	8.053	8.273	8.432
BM254738	9.749	10.125	9.817	8.927	9.874	9.543	9.788	9.308	9.618	9.804	9.945	9.763	9.838	10.016	9.44	9.167	9.926	9.37	9.92	9.905
BM255269	6.656	6	4.821	4.64	4.863	4.932	4.828	4.72	5.466	5.499	5.244	5.512	4.77	4.891	4.864	4.986	4.709	4.713	5.412	5.368
BM255454	5.24	5.115	5.05	4.923	5.25	5.02	4.862	4.695	5.096	4.996	5.544	4.833	4.727	5.168	4.968	4.889	4.991	4.697	4.929	4.967
BM255551	9.582	9.84	9.187	8.284	9.435	9.747	10.057	9.459	9.329	9.371	9.574	9.604	9.433	9.298	9.44	9.801	10.029	9.655	9.572	9.634
BM255861	8.742	8.512	8.634	7.633	9.134	10.171	9.935	9.658	9.475	9.67	8.514	8.51	8.679	8.56	9.175	10.073	10.326	9.784	9.871	9.65
BM256381	4.307	4.824	4.693	4.906	5.228	4.982	4.537	4.616	4.546	4.879	4.632	4.46	4.347	4.712	4.621	4.665	4.796	4.595	4.753	4.914
BM256404	9.109	7.742	7.775	5.318	5.297	4.816	4.936	4.679	5.244	5.097	9.295	7.891	6.957	5.877	5.148	5.194	5.194	4.964	5.047	5.058
BM256609	12.312	12.955	12.496	10.287	11.447	11.155	10.925	10.697	10.681	10.647	12.161	12.395	12.54	10.637	11.369	10.877	11.53	10.907	11.164	10.813
BM256766	12.679	12.528	12.287	11.616	11.301	11.253	11.025	10.827	10.791	10.964	12.505	12.163	12.216	11.508	11.11	10.94	11.251	11.018	11.107	11.021
BM256787	5.359	6.044	5.372	5.172	5.041	4.881	4.773	4.828	4.666	5.118	5.656	5.267	5.262	5.565	4.894	4.629	4.899	4.754	4.919	5.224
BM257395	7.616	8.54	10.399	6.322	6.421	6.385	6.133	5.955	5.914	6.179	7.944	9.257	9.874	6.652	6.171	6.03	6.222	6.083	6.085	6.035
BM257534	9.234	8.844	8.684	7.105	7.72	8.014	8.044	7.602	8.102	8.189	9.214	8.781	8.514	8.151	7.797	8.021	8.095	8.005	8.317	8.283
BM258431	11.332	11.304	10.565	9.605	10.643	10.858	11.062	10.852	10.935	11.101	11.373	11.123	10.743	10.4	10.386	10.479	10.956	10.864	10.998	11.084
BM285701	9.39	10.206	10.955	9.378	10.584	11.435	11.5	11.333	11.399	11.515	9.375	10.175	11.594	11.075	10.839	11.329	11.176	11.608	11.479	11.708
BM286287	11.645	12.259	12.682	9.901	10.961	11.272	10.771	10.868	10.908	10.914	11.512	12.405	12.558	9.734	11.267	11.041	11.414	10.806	11.671	10.76
BM286381	10.265	10.102	9.964	9.488	8.848	9.055	9.234	8.759	8.712	9.154	9.913	9.993	9.821	9.949	9.002	9.105	9.122	9.114	8.897	9.265
BM286648	9.938	9.704	9.353	8.023	8.543	8.492	8.321	7.954	8.002	8.512	9.861	9.485	9.128	8.33	8.259	8.162	8.519	8.201	8.236	8.666
BM287143	6.205	6.84	7.31	4.762	4.719	4.595	5.436	4.372	4.532	4.735	5.963	7.323	7.275	5.104	4.483	4.685	5.445	4.896	4.511	4.707
BM287263	11.405	11.528	11.24	11.556	11.285	11.553	11.237	10.704	11.021	11.731	11.565	11.179	10.928	11.406	11.109	11.219	11.055	10.849	11.266	11.616
BM287684	9.459	9.201	8.875	6.188	6.382	6.672	6.213	5.846	6.014	7.146	9.175	8.533	8.052	6.744	5.785	6.236	6.249	6.035	6.044	6.833
BM287943	4.757	5.168	5.366	4.601	4.644	4.578	4.695	4.908	4.552	4.647	5.236	4.982	4.359	5.042	4.507	4.247	4.574	4.64	4.896	4.569
BM288215	5.144	4.738	4.857	4.678	4.749	4.374	4.313	4.282	4.52	4.689	5.397	4.971	4.329	4.503	4.179	4.596	4.599	4.933	4.448	4.536
BM288548	10.383	9.956	9.133	7.239	8.469	8.849	8.519	8.289	8.326	8.829	10.205	9.675	9.073	7.879	8.284	8.397	8.844	8.434	8.592	8.664
BM288690	12.666	14.078	13.511	13.525	14.215	14.454	14.451	13.843	14.325	14.255	13.071	13.287	13.499	14.089	14.217	14.009	14.622	14.205	14.693	14.352
BM362454	4.234	4.878	5.627	6.21	8.24	8.74	9.168	7.936	8.347	7.857	4.336	4.644	5.572	6.386	7.947	8.203	9.269	7.89	8.659	7.896
BM363419	6.437	6.632	7.222	6.889	7.72	7.792	7.122	6.849	6.979	7.638	6.304	6.302	6.854	7.086	7.518	7.233	7.784	7.033	7.288	7.67
BM365980	9.865	11.614	11.643	11.041	10.924	11.082	10.587	10.272	10.23	10.496	10.858	11.241	11.617	11.636	10.706	10.785	10.775	10.486	10.553	10.556
BM366469	5.89	6.008	5.826	5.239	5.566	5.268	5.867	5.422	5.729	5.564	5.972	5.611	5.639	5.48	5.547	5.033	5.661	5.426	5.496	5.445
BM429519	9.291	9.045	8.354	8.117	8.191	8.277	8.93	8.428	8.507	8.705	9.118	8.647	8.795	8.614	8.202	8.458	8.726	8.417	8.633	8.786
BM429815	12.116	12.177	12.235	11.534	11.815	12.103	11.876	11.679	11.615	12.229	12.14	11.995	11.761	11.958	11.75	11.823	12.078	11.855	11.858	12.171
BM429871	9.317	9.329	9.05	9.241	9.461	9.675	9.622	9.261	9.07	9.395	9.248	9.341	9.023	9.238	9.203	9.492	9.663	9.435	9.322	9.468
BM430012	4.727	5.552	5.535	5.143	5.58	5.582	5.457	5.371	5.321	5.587	5.878	5.844	6.554	5.741	5.484	5.766	6.018	5.522	5.48	5.719
BM430374	11.195	12.362	11.567	10.623	10.912	11.066	10.98	10.62	10.838	10.889	11.666	11.633	11.753	11.331	10.722	11.015	11.098	11.045	11.016	11.009
BM430531	10.73	10.376	10.236	6.644	7.185	7.254	6.98	6.965	6.902	7.001	11.15	10.66	9.854	7.013	7.093	7.057	7.275	6.972	7.122	7.001
BM430647	12.981	13.182	12.253	13.545	12.338	12.576	12.627	12.505	12.607	12.789	13.14	12.474	12.478	13.351	11.874	12.307	12.624	12.61	12.711	12.878
BM430966	7.288	7.059	7.149	4.528	5.38	5.219	5.062	4.748	4.832	5.409	6.965	7.162	6.949	5.018	5.092	4.805	5.388	4.81	5.163	5.398
BM431428	10.054	10.281	9.914	8.965	9.406	9.674	9.896	9.346	9.197	9.142	10.257	10.08	9.798	9.596	9.247	9.534	10.106	9.603	9.457	9.202
BM431555	9.338	8.857	8.382	7.366	6.701	5.754	6.987	6.403	6.18	6.652	9.472	8.738	8.274	7.813	6.292	5.63	6.716	6.369	6.216	6.629
BM431615	6.58	6.729	6.868	6.249	7.021	6.97	6.903	6.4	7.031	6.686	6.911	6.454	6.69	6.957	6.861	6.545	6.911	6.578	7.256	6.49
BM431634	11.724	11.937	11.475	7.774	8.344	7.98	8.716	8.114	7.826	8.683	11.321	11.62	11.312	8.505	8.173	7.732	8.795	7.981	7.958	8.75
BM432245	10.006	10.297	10.147	8.46	9.106	8.563	9.162	8.536	9.093	8.8	10.417	9.892	9.802	8.588	8.825	8.652	9.278	8.705	9.165	8.943
BM432301	9.902	9.478	8.426	6.135	7.232	7.104	7.308	7.007	6.916	6.824	9.67	9.564	9.005	6.538	7.143	6.979	7.329	6.98	7.227	6.915
BM432747	10.71	10.604	10.313	10.04	10.563	10.278	10.356	10.087	10.029	10.439	10.845	10.532	10.38	10.29	10.203	10.116	10.324	10.294	10.24	10.737
BM432783	11.831	11.931	11.55	11.507	12.026	12.2	11.511	11.518	11.562	12.141	11.915	11.761	11.453	11.94	11.893	11.876	11.697	11.81	11.908	12.291
BM432866	11.881	11.943	11.649	11.015	10.949	10.818	10.931	10.467	10.31	10.562	11.886	11.721	11.799	11.188	10.879	10.752	10.977	10.675	10.62	10.806
BM432874	8.884	9.202	9.417	8.724	9.464	9.524	9.324	9.083	9.185	9.761	9.327	9.087	9.163	9.205	9.237	9.137	9.344	9.378	9.396	9.639
BM433081	12.891	13.099	12.804	11.411	12.441	12.798	12.893	12.745	12.489	12.769	13.129	12.776	12.751	12.08	12.301	12.652	12.833	12.81	12.604	12.908
BM433550	9.999	9.949	9.557	10.083	9.852	9.854	9.999	9.197	9.455	9.958	10.028	9.668	9.373	10.177	9.316	9.671	10.24	9.411	9.776	9.827
BM434086	11.766	11.742	11.411	10.874	11.22	11.38	11.333	11.127	11.038	11.659	11.862	11.748	11.224	11.071	11.061	11.28	11.352	11.337	11.297	11.65
BM434265	11.209	11.411	10.889	9.687	10.262	10.429	10.365	9.952	10.137	10.482	11.002	10.965	10.663	10.303	9.789	9.989	10.143	9.883	10.128	10.308
BM434559	12.749	12.58	12.403	11.281	10.231	10.356	9.845	9.679	9.901	10.223	12.913	12.46	12.084	11.79	10.434	10.223	10.216	9.854	10.336	10.343
BM434811	10.31	7.134	7.427	4.55	4.859	4.944	4.796	4.891	4.326	4.63	8.644	7.431	7.824	4.413	4.588	4.2	4.424	4.931	4.265	4.667
BM434850	11.315	11.745	10.638	10.079	9.805	9.061	9.355	9.074	9.434	9.843	11.454	11.394	10.853	11.044	9.322	9.059	9.213	9.067	9.672	9.866
BM435271	8.233	8.263	8.647	9.541	9.926	10.364	10.272	10.156	10.132	10.445	8.128	8.333	8.484	9.285	9.643	10.29	10.423	10.201	10.11	10.424
BM435408	12.758	12.817	12.417	11.571	12.07	12.39	12.136	11.641	11.705	12.035	12.923	12.393	12.251	12.278	11.959	12.276	12.296	11.855	11.912	12.122
BM435923	5.165	6.016	5.287	4.655	5.048	5.083	4.71	4.732	4.932	5.04	5.412	5.456	5.369	4.784	4.834	5.014	5.334	5.012	4.958	5.204
BM436204	11.231	11.571	11.031	8.392	9.209	8.424	9.857	8.916	8.681	8.971	11.411	11.426	11.028	9.625	8.688	8.237	9.701	8.834	8.666	8.969
BM445689	10.529	11.008	10.844	11.122	10.926	11.307	11.367	10.825	10.796	11.154	10.623	10.765	10.877	11.888	10.905	11.168	11.436	11.195	11.033	11.467
BM446241	8.927	8.684	7.694	5.525	6.134	5.84	5.728	5.682	6.125	6.292	8.555	7.791	7.617	6.165	6.085	5.648	6.168	5.908	6.44	6.466
BM446373	5.04	5.33	5.432	4.998	5.276	5.422	5.153	5.237	5.458	5.235	5.446	5.003	5.364	5.368	4.968	5.142	5.262	5.206	5.524	5.148
BM446400	11.868	11.454	11.084	8.956	9.688	9.682	9.604	9.117	9.128	9.249	11.531	11.403	11.128	9.639	9.291	9.271	9.81	9.212	9.535	9.31
BM446431	8.852	8.475	7.696	6.519	7.202	6.907	7.509	6.934	7.117	7.213	8.846	8.371	7.87	7.413	6.914	7.106	7.154	7.144	7.159	7.322
BM446532	8.154	9.685	10.004	7.399	8.345	8.754	8.47	8.177	8.567	9.101	8.983	9.449	10.069	8.188	8.521	8.996	8.591	8.525	9.372	9.911
BM480533	7.321	6.883	6.513	5.053	6.017	5.829	5.571	5.601	5.661	5.904	7.252	6.722	6.28	5.763	5.915	5.465	5.751	5.747	5.705	6.087
BM480643	11.421	11.732	11.602	12.893	12.459	12.41	12.627	12.03	12.056	13.001	11.798	11.466	11.349	12.965	12.058	12.213	12.201	12.043	12.162	12.885
BM481467	11.235	8.741	7.362	4.881	6	5.952	6.308	5.6	6.05	5.927	8.868	8.178	7.638	5.539	5.855	6.222	6.222	6.282	6.299	6.25
BM482289	10.276	10.331	9.663	9.638	8.833	9.058	8.303	8.466	8.341	9.066	10.188	9.968	10.139	9.228	8.711	8.794	8.71	8.693	8.618	9.069
BM482496	8.977	8.457	7.599	5.641	6.599	6.227	5.962	5.808	5.86	6.013	8.917	8.289	7.864	6.389	6.624	6.314	6.322	6.088	6.187	6.187
BM482729	9.809	9.761	9.455	7.65	8.177	8.445	8.963	8.034	8.234	8.344	9.805	9.66	9.246	8.459	7.838	8.152	8.646	8.023	8.484	8.198
BM483206	7.536	7.425	7.038	11.316	9.485	7.873	9.253	7.83	7.324	9.323	6.784	6.832	6.814	10.754	8.238	7.862	8.877	7.57	7.554	9.586
BM483215	7.994	9.053	8.323	5.84	6.614	6.687	6.645	6.603	6.553	6.686	7.806	8.825	8.197	6.544	6.721	6.784	6.933	6.803	6.922	6.919
BM483254	11.137	11.187	10.896	9.135	9.252	8.753	8.994	8.488	8.309	8.023	11.095	11.192	11.189	8.637	8.652	8.55	8.775	8.235	8.328	8.052
BM483415	9.05	9.938	10.031	8.693	9.542	9.648	9.456	9.186	9.295	10.073	9.374	9.67	9.786	9.165	9.123	9.106	9.13	9.02	9.307	9.632
BM890608	10.619	11.351	10.793	11.4	11.461	11.091	11.085	10.747	10.635	11.258	10.394	10.517	10.906	12.502	10.993	10.799	11.016	10.846	11.038	11.655
BM929174	12.124	12.209	11.624	9.766	10.232	10.647	10.914	10.3	10.083	10.724	12.177	12.041	11.733	10.427	9.891	10.256	10.907	10.309	10.429	10.813
BM956175	7.767	8.212	7.708	6.718	7.577	7.618	7.715	7.326	7.085	7.049	7.712	7.646	7.783	7.471	7.624	7.752	8.019	7.79	7.701	7.596
BM967987	5.069	4.671	5.34	4.792	4.862	4.701	4.349	4.621	4.982	4.919	5.48	4.566	4.532	4.864	4.674	4.773	4.943	4.533	5.427	4.977
BM986201	13.283	12.874	12.271	12.262	11.425	11.064	11.02	11.256	10.769	11.138	13.344	12.655	12.274	13.709	12.116	11.218	10.848	12.133	11.125	12.192
BMP10	4.689	4.988	5.288	5.056	4.947	4.895	4.968	4.66	4.98	4.889	5.177	4.784	4.796	5.315	4.557	4.32	4.832	4.731	4.933	4.705
BMP2	5.224	4.861	4.678	5.232	4.682	4.865	4.414	4.536	4.679	4.686	5.161	4.501	4.532	4.672	4.641	4.679	4.824	4.696	4.742	4.95
BMP2K	5.778	5.683	5.292	5.027	5.637	5.591	5.042	5.158	5.354	5.512	6.005	5.303	5.318	5.561	5.497	5.366	5.425	5.605	5.447	6.197
BMP4	7.475	6.882	6.726	5.615	6.156	6.323	6.262	5.924	6.11	6.214	7.063	6.748	7.042	5.96	5.612	5.908	6.583	6.061	6.351	6.147
BMP5	9.124	8.717	9.083	6.402	8.095	8.962	8.35	8.692	8.609	9.161	9.63	9.14	9.466	7.783	8.309	8.822	8.752	9.113	9.057	9.192
BMP7	8.277	8.003	7.148	6.784	6.956	6.803	6.147	6.083	6.298	6.843	8.18	7.604	7.309	7.042	6.824	6.595	6.567	6.289	6.647	6.842
BMPR1A	6.291	6.338	6.302	6.167	7.024	7.189	6.771	6.724	6.315	6.632	6.543	6.303	6.148	6.442	6.623	6.828	6.541	6.707	6.538	6.413
BMPR1B	5.483	5.692	6.516	5.097	5.428	5.591	5.809	4.983	5.31	5.194	5.815	5.691	6.215	5.209	5.467	5.395	5.763	5.02	5.038	5.147
BMPR2	9.176	8.818	9.025	8.422	9.059	9.152	8.618	8.739	8.455	9.073	9.073	8.953	8.857	8.669	8.92	8.805	8.71	8.856	8.668	9.006
BMS1L	11.812	11.564	10.802	10.687	10.572	10.546	10.848	10.085	10.074	10.294	11.758	11.239	11.014	11.693	10.509	10.613	10.656	10.456	10.496	10.714
BNBD-4	9.349	9.149	6.312	7.315	4.535	4.704	4.28	4.287	5.92	4.982	9.841	9.355	6.821	5.531	4.766	4.544	5.547	4.709	5.623	5.686
BNC2	6.505	5.197	4.948	4.756	4.679	4.792	4.44	4.634	4.714	4.751	6.355	5.107	4.922	5.173	4.623	4.226	4.637	5.333	4.798	4.894
BNIP1	6.976	7.271	7.183	7.136	7.117	6.67	6.247	6.03	6.719	6.686	7.354	7.063	7.114	7.386	6.861	6.66	6.4	6.522	6.844	6.782
BNIP2	4.28	4.553	4.425	4.423	4.36	4.695	4.712	4.528	5.489	4.994	4.723	4.474	4.526	4.318	4.744	4.557	4.937	4.52	5.637	4.835
BNIP3L	12.846	13.385	12.579	11.532	10.706	10.519	10.844	10.144	10.381	10.598	13.251	12.901	12.554	11.249	10.444	10.291	10.748	10.043	10.631	10.727
BOK	11.203	12.165	11.604	11.595	11.082	11.029	10.674	10.462	10.675	11.218	11.225	11.298	11.43	12.266	11.026	11.035	10.76	10.702	11.012	11.388
BOLA-DOB	4.642	5.162	5.003	4.88	5.417	5.473	5.183	5.12	6.103	5.705	5.1	4.767	4.869	5.113	5.262	5.171	5.271	5.488	5.96	5.777
BOLA-DQA2	4.683	6.558	7.13	5.22	8.163	8.417	7.806	7.986	7.185	7.664	4.905	4.853	7.743	7.039	7.317	7.146	7.49	7.175	6.966	6.363
BOLA-DQB	4.708	4.744	4.083	4.277	8.027	8.511	7.95	8.06	8.924	8.454	4.296	4.858	4.94	4.244	5.939	5.978	6.551	6.652	6.586	6.772
BOLA-DYB	5.344	5.401	5.417	4.925	5.056	4.766	4.287	4.915	4.918	5.009	5.621	5.011	4.961	5.416	4.712	4.371	4.687	5.05	5.065	5.202
BOLL	4.584	5.145	5.702	5.651	6.921	7.48	6.696	6.795	6.413	7.044	5.023	5.11	5.535	5.773	6.253	6.594	7.09	6.538	6.448	6.562
BOP1	7.292	7.385	7.342	8.144	8.061	8.171	7.79	7.751	7.336	8.001	7.261	7.789	8.18	8.937	8.221	8.343	7.901	8.451	7.155	7.841
BP107122	11.369	11.686	12.422	11.77	14.003	14.192	14.034	13.873	13.501	13.744	11.554	11.724	12.356	12.501	14.009	14.181	13.987	13.961	13.702	13.958
BP107683	9.402	9.511	9.579	10.158	9.51	9.441	9.757	9.048	9.026	9.548	9.704	9.258	9.278	10.006	9.454	9.387	9.497	9.089	9.228	9.567
BP107912	13.736	13.346	12.523	8.233	8.244	7.746	7.822	7.252	7.524	7.044	14.308	13.992	12.34	9.06	8.393	7.512	7.726	7.227	7.8	7.074
BP108095	16.724	17.334	17.007	17.189	16.69	16.578	16.508	16.307	16.186	16.554	17.092	16.762	16.803	17.643	16.352	16.22	16.728	16.492	16.593	16.671
BP108533	8.975	8.727	8.636	6.452	7.176	7.8	7.1	6.986	7.032	7.612	8.74	8.336	8.196	6.792	6.758	7.014	7.402	6.786	7.105	7.311
BP108674	6.016	5.127	4.649	4.533	4.64	4.733	4.716	4.447	5.045	5.181	6.17	4.549	4.815	4.72	4.899	4.789	4.647	4.956	5.029	5.354
BP108685	8.675	8.475	8.84	5.834	7.043	7.72	7.493	7.314	6.896	7.507	7.909	8.197	8.55	7.095	6.651	6.993	7.238	6.876	6.861	7.152
BP108821	9.973	9.496	10.155	8.139	8.149	8.899	8.659	8.023	8.141	8.327	10.223	9.656	9.406	9.081	8.112	8.403	8.349	7.993	8.244	8.157
BP108872	6.965	7.292	7.314	5.729	6.08	6.154	6.184	5.997	5.919	5.944	7.303	7.721	7.902	6.617	5.919	6.003	6.745	6.209	6.246	6.2
BP109600	9.801	10.151	10.191	9.448	9.988	10.319	10.227	9.799	9.7	10.054	9.872	9.796	10.135	9.975	10.07	10.173	10.298	10.063	10.105	10.171
BP110200	9.918	9.978	10.071	8.419	9.848	8.784	9.119	9.736	9.506	10.422	9.732	10.409	10.78	9.394	9.542	8.094	8.946	10.406	9.453	10.615
BP110264	10.429	11.002	10.881	11.052	11.069	11.502	11.328	10.995	11.118	11.635	10.393	10.612	10.864	11.255	10.853	11.074	11.444	11.121	11.391	11.622
BP110317	12.979	12.482	11.666	11.269	11.051	11.272	11.259	10.81	10.963	11.478	12.951	12.173	11.73	11.761	10.914	11.053	11.185	10.924	11.095	11.436
BP110320	9.883	10.344	9.53	9.915	10.34	10.569	10.542	10.641	10.71	10.936	9.906	9.871	9.662	10.45	10.526	10.768	11.283	10.977	11.268	11.252
BP110411	6.283	6.256	5.163	4.606	4.747	4.91	4.877	4.484	4.773	4.735	6.409	5.87	5.409	4.722	4.505	4.611	4.865	4.677	4.648	4.827
BP111365	11.648	11.937	11.64	11.812	11.772	12.154	12.076	11.733	11.556	11.919	11.697	11.647	11.724	12.109	11.773	12.059	12.123	11.923	11.878	12.116
BP112803	9.546	9.831	9.081	8.128	8.992	9.143	9.228	8.682	8.989	9.473	9.558	9.173	9.088	9.286	8.867	9.077	9.145	8.904	9.255	9.664
BPGM	5.401	5.14	5.636	7.642	9.207	9.615	8.671	8.849	8.672	9.02	5.158	4.982	5.446	7.797	9.188	9.152	8.842	8.668	8.685	8.917
BPIL1	4.772	4.918	5.043	4.999	5.542	5.532	5.284	5.35	5.262	5.496	4.945	4.635	4.856	5.253	5.342	5.244	5.526	5.376	5.339	5.389
BPIL2	4.257	4.549	4.366	4.133	4.913	5.895	5.091	4.768	5.192	5.558	4.261	4.119	4.422	4.416	4.865	5.002	4.774	4.52	5.278	5.043
BPNT1	11.09	11.352	10.518	9.053	10.864	10.842	10.918	10.306	10.403	10.512	11.078	10.713	10.701	10.468	10.595	10.626	11.141	10.344	10.677	10.535
BRAF	6.195	5.989	5.954	6.427	6.531	6.348	6.321	6.263	5.986	6.481	6.323	5.836	5.898	6.41	6.229	6.298	6.282	6.558	6.111	6.462
BRAP	9.838	9.947	9.543	8.652	8.702	8.847	8.853	8.224	8.452	8.861	10.02	9.676	9.521	9.002	8.445	8.548	8.706	8.411	8.591	8.848
BRCA1	5.644	5.114	5.138	4.653	4.63	5.015	4.616	4.85	4.739	5.02	5.876	5.214	5.004	4.823	4.513	4.935	5.096	4.876	4.632	5.114
BRCA2	8.201	7.673	6.613	4.69	5.329	4.895	5.076	5.156	4.905	4.87	8.443	7.616	6.654	4.759	5.108	4.888	5.195	5.054	5.075	5.167
BRD2	13.33	13.798	13.312	12.968	13.264	13.275	13.449	12.899	12.973	12.866	13.385	13.314	13.381	13.22	13.257	13.251	13.573	13.132	13.139	13.092
BRD4	11.742	11.488	11.371	12.023	12.031	12.337	11.617	11.287	11.418	12.274	11.932	11.419	11.245	12.139	11.752	11.922	11.774	11.623	11.776	12.242
BRD7	10.718	10.76	10.253	9.324	10.002	10.187	10.426	10.006	9.623	10.034	10.67	10.802	10.562	9.94	9.854	10.096	10.371	10.149	9.914	10.214
BRD8	12.628	12.865	12.573	12.496	12.101	12.181	12.558	11.841	11.779	12.109	12.574	12.444	12.459	12.37	11.756	12.04	12.289	11.836	11.868	12.333
BRD9	13.627	14.197	13.862	12.644	13.039	12.945	12.819	12.661	12.599	13.07	13.945	13.794	13.769	13.34	12.916	12.92	12.964	12.91	12.827	13.183
BREH1	4.973	4.513	4.648	4.756	5.347	5.439	4.796	5.167	5.571	5.883	5.114	4.728	4.604	5.194	4.976	4.798	4.747	5.249	5.453	5.894
BRF1	8.053	8.612	8.478	8.413	8.523	8.758	8.807	8.422	8.301	8.639	8.182	8.409	8.271	9.1	8.466	8.804	8.716	8.549	8.496	8.742
BRI3	4.845	5.116	4.887	4.984	4.747	4.471	4.898	4.644	4.569	5.184	4.633	4.587	4.779	5.157	4.598	4.481	5.01	5.229	4.862	5.237
BRI3BP	8.327	8.237	7.574	6.775	7.091	7.324	6.837	6.555	6.941	6.833	8.642	7.663	7.335	7.407	6.934	6.941	7.082	6.794	7.477	6.931
BRMS1	11.135	11.501	10.893	10.468	10.447	10.307	10.415	9.912	10.206	10.89	11.306	11.196	10.987	11.291	10.337	10.172	10.352	10.131	10.432	10.98
BRMS1L	11.432	10.948	10.451	9.869	10.376	10.725	10.547	10.633	10.528	10.934	11.334	10.787	10.434	10.402	10.375	10.708	10.609	10.745	10.673	10.975
BRP44L	13.52	14.98	14.971	15.165	15.558	15.55	15.589	15.191	15.227	15.426	14.042	14.857	14.99	15.763	15.597	15.33	15.558	15.316	15.611	15.583
BRPF3	7.354	7.717	7.47	7.33	7.6	7.794	7.921	7.404	7.408	7.721	7.474	7.386	7.297	8.061	7.626	7.925	7.748	7.57	7.464	7.693
BRRN1	7.142	6.483	6.34	4.459	4.663	4.577	4.8	4.422	4.402	4.62	7.466	6.615	6.122	5.229	4.74	4.735	4.431	4.67	4.912	4.604
BRS3	4.653	4.351	4.619	4.529	4.615	4.438	4.591	4.823	4.554	4.581	4.764	4.25	4.387	4.94	4.198	4.545	4.575	4.761	4.383	4.77
BRUNOL4	10.056	7.343	6.002	4.71	4.965	4.606	4.721	4.537	5.209	5.383	7.76	6.144	5.908	4.853	4.611	4.689	4.682	4.968	5.497	5.337
BRUNOL5	6.261	6.33	6.509	6.015	5.976	6.027	5.796	5.568	5.866	5.995	6.522	6.072	6.316	6.393	5.755	5.693	5.861	5.841	6.041	6.035
BRUNOL6	7.428	5.848	4.784	4.562	4.615	4.722	4.646	4.715	4.906	5.691	5.331	5.044	4.886	5.066	4.484	4.555	4.804	5.117	5.098	5.766
BSCL2	7.26	7.41	7.893	8.19	9.303	9.245	8.948	8.432	8.904	9.075	7.527	7.402	7.73	8.468	9.131	8.8	9.093	8.458	9.201	8.957
BSG	11.363	12.54	11.941	12.728	12.9	13.402	12.423	12.366	13.146	13.323	11.58	11.719	11.914	13.225	13.025	12.912	13.083	12.84	13.733	13.44
BSN	11.412	11.417	12.193	10.586	10.803	10.512	10.495	9.913	9.871	10	10.757	11.102	12.042	10.645	10.417	10.089	10.211	9.767	9.894	9.883
BSND	6.577	6.564	7.032	6.83	7.17	7.256	6.716	6.498	6.529	6.47	6.766	6.472	6.813	6.831	6.936	6.833	6.897	6.638	6.585	6.534
BSP30A	7.362	8.439	9.761	6.561	7.243	7.496	6.999	6.954	7.284	7.224	7.679	7.561	8.421	6.832	7.052	6.808	7.18	7.073	7.591	7.084
BSP30B	7.155	8.51	9.856	6.624	7.204	7.493	6.969	7.053	7.409	7.297	7.652	7.556	8.477	6.887	7.056	6.875	7.129	7.082	7.671	7.201
BSPRY	5.87	5.497	4.991	4.589	4.741	4.65	4.473	4.614	4.757	4.845	5.437	4.707	4.993	4.628	4.82	4.306	4.829	4.585	4.776	4.798
BTAF1	9.269	8.99	8.536	8.477	8.498	8.294	8.269	7.865	8.015	8.192	9.422	8.781	8.412	8.528	8.295	8.188	8.248	8.13	8.19	8.327
BTBD11	9.816	8.818	8.797	10.528	8.032	7.52	6.999	8.314	8.211	10.117	9.094	8.889	8.843	10.034	7.59	7.543	7.575	9.076	8.565	10.169
BTBD12	11.877	11.546	10.942	8.539	9.633	9.84	9.982	9.391	9.205	9.747	11.738	11.125	10.956	9.369	9.543	9.645	10.069	9.576	9.677	9.873
BTBD14A	6.151	6.75	7.252	5.869	5.941	6.146	5.785	5.546	5.836	6.237	6.34	6.409	6.684	6.335	5.578	5.744	5.722	5.901	5.869	6.119
BTBD14B	12.266	12.635	11.924	11.619	12.636	12.89	12.249	12.216	12.512	12.803	12.42	12.189	12.004	12.233	12.549	12.61	12.477	12.439	12.802	12.944
BTBD2	9.142	9.629	9.564	8.024	8.595	9.228	8.45	8.226	8.45	8.967	9.448	9.404	9.247	8.439	8.411	8.703	8.85	8.529	8.881	8.842
BTBD3	11.286	10.794	10.291	8.481	9.693	10.139	9.984	9.78	9.466	9.517	11.053	10.397	10.499	9.171	9.43	9.731	10.231	9.372	9.607	9.461
BTBD4	4.726	4.799	5.15	4.421	4.743	4.482	4.591	4.395	4.783	4.797	4.605	4.255	4.393	4.577	4.568	4.339	5.239	4.436	4.765	4.899
BTBD5	12.115	11.922	11.801	9.696	11.001	11.645	11.665	11.072	10.93	11.117	11.96	11.873	11.681	10.877	10.84	11.265	11.871	11.142	11.287	11.122
BTBD7	11.51	11.564	10.805	10.191	10.438	10.668	10.797	10.329	10.134	10.427	11.552	11.089	10.986	10.658	10.276	10.697	10.864	10.507	10.4	10.657
BTBD8	7.276	8.444	7.137	6.967	6.444	6.79	6.491	6.277	6.365	6.229	7.631	7.422	7.108	7.093	6.481	6.161	6.522	6.128	6.454	6.019
BTBD9	8.611	8.504	8.539	8.463	8.919	9.345	8.945	8.826	8.446	8.47	8.571	8.383	8.359	8.305	8.859	9.019	9.278	8.692	8.896	8.647
BTC	4.71	8.359	9.973	9.175	10.695	10.918	10.588	10.681	10.242	11.075	4.566	7.886	9.759	9.604	10.518	10.831	11.357	10.544	10.616	10.887
BTD	6.692	6.76	6.686	7.086	6.518	6.563	6.28	5.819	6.347	6.663	6.861	6.497	6.544	7.072	6.311	6.355	5.976	6.152	6.517	6.778
BTF3	11.397	12.365	12.108	11.47	10.743	11.286	11.347	10.511	9.755	10.257	12.263	11.293	10.49	11.866	11.049	11.726	11.276	11.16	10.465	10.724
BTG1	13.192	13.176	12.82	14.889	13.179	13.152	12.787	11.764	11.823	12.732	13.184	12.733	12.642	14.065	12.915	12.892	12.521	11.935	12.1	13.254
BTG2	8.845	10.048	8.167	9.963	9.49	10.165	9.915	9.525	9.163	9.225	8.391	9.659	8.697	9.102	11.839	11.951	10.021	10.281	10.802	10.07
BTG3	10.435	11.148	10.799	9.145	8.632	8.281	8.564	7.97	8.06	8.569	10.898	10.847	11.02	9.166	8.916	8.451	8.67	8.303	8.693	8.83
BTG4	4.692	4.528	4.605	4.393	4.561	4.747	4.174	4.561	4.57	4.371	4.715	4.46	4.454	4.48	4.563	4.462	4.698	4.667	4.376	4.571
BTK	6.538	6.891	5.393	5.002	5.72	5.728	5.721	5.579	6.241	5.758	6.567	6.434	6.124	5.389	5.443	5.538	5.585	5.524	6.141	6.124
BTN1A1	4.763	4.689	4.679	4.635	4.614	4.862	4.36	4.484	4.699	4.566	4.472	4.113	4.474	4.789	4.288	4.575	4.587	4.69	4.589	4.846
BTRC	10.281	10.009	9.44	7.657	8.907	9.456	9.383	9.125	9.077	9.254	10.222	9.845	9.464	8.589	8.643	9.115	9.574	9.13	9.337	9.318
BUB1	10.064	9.31	7.883	4.368	5.418	4.541	4.62	4.94	5.567	4.713	10.279	8.9	8.01	4.502	5.176	4.762	4.67	4.991	5.452	4.817
BUB3	10.523	10.055	9.143	8.042	8.091	8.056	8.145	7.898	8.034	8.235	10.445	9.853	9.418	8.862	8.213	8.177	8.168	8.155	8.346	8.676
BUCS1	5.133	8.496	5.406	5.902	7.411	7.909	6.85	8.221	8.969	10.255	5.333	7.131	6.06	6.81	6.821	8.651	7.05	8.828	10.314	11.245
BVES	5.491	5.908	6.478	5.871	7.14	7.151	7.064	6.97	7.001	7.094	6.136	6.193	6.275	6.36	6.366	6.616	6.668	6.715	6.9	6.733
BXDC1	7.804	7.875	7.528	9.33	8.095	7.973	8.014	7.689	7.76	8.127	7.808	7.6	7.458	9.784	7.857	7.789	7.712	7.903	7.93	8.308
BXDC2	11.394	11.254	10.361	10.243	9.342	9.271	9.459	9.154	9.128	9.426	11.535	11.159	10.547	10.718	9.254	9.463	9.354	9.529	9.401	9.76
BZRAP1	7.904	7.678	7.39	5.561	5.847	5.982	5.783	5.866	6.023	6.16	7.768	7.561	7.257	5.981	5.762	5.795	6.013	6.102	6.209	6.226
BZRP	11.406	12.914	11.257	10.147	11.254	11.461	11.483	11.041	11.666	11.607	10.932	11.597	11.401	10.334	11.255	11.354	11.555	11.203	11.863	11.72
BZW1	9.943	9.863	9.525	9.37	9.654	9.665	9.434	9.157	9.424	9.789	9.981	9.873	9.659	9.895	9.766	9.577	9.527	9.362	9.747	9.905
BZW2	12.95	13.019	13.826	14.154	14.259	14.493	14.39	14.142	14.361	14.685	12.687	13.134	13.352	14.611	13.74	13.777	14.858	14.141	14.385	14.511
Bv1	6.936	6.935	7.554	5.663	6.246	6.306	6.855	6.063	6.072	6.554	7.684	7.217	7.381	6.429	6.249	5.839	6.117	5.905	5.629	6.048
C10orf104	12.35	13.049	13.511	12.765	13.61	13.843	14.003	13.551	13.464	13.625	12.618	13.429	13.643	13.294	13.337	13.556	14.011	13.548	13.596	13.568
C10orf107	7.657	7.867	7.203	4.991	5.482	5.822	5.749	6.002	6.007	5.953	7.621	7.529	7.136	5.239	5.539	6.032	6.018	6.169	6.443	6.058
C10orf11	5.354	6.676	6.637	5.137	5.492	5.834	5.321	5.318	6.189	6.041	6.058	6.988	7.007	5.707	5.519	5.439	5.46	5.577	6.299	6.119
C10orf113	4.516	5.185	4.972	4.443	4.71	5.088	4.685	4.256	4.756	4.478	4.91	4.83	4.692	4.611	4.399	4.753	4.831	4.45	4.66	4.722
C10orf116	10.274	13.119	11.325	11.88	12.542	12.535	12.27	11.741	12.376	12.495	10.107	11.824	11.796	12.487	12.681	12.139	12.504	11.842	13.108	12.908
C10orf118	7.159	7.639	7.846	7.759	8.133	7.394	7.588	7.279	7.167	8.005	7.482	7.54	7.522	7.674	7.543	7.218	7.571	7.61	7.263	7.984
C10orf119	11.903	11.752	11.08	11.429	11.255	11.525	11.594	10.982	10.83	11.277	11.701	11.52	11.373	11.842	11.389	11.621	11.46	11.206	11.133	11.585
C10orf13	5.622	5.285	5.329	4.937	4.913	4.794	4.56	4.872	4.894	5.073	5.329	4.929	4.958	5.314	4.566	4.836	4.73	4.908	4.986	5.173
C10orf137	8.477	8.405	8.412	7.843	8.579	8.745	8.272	7.809	8.066	8.685	8.458	8.212	8.081	8.289	8.251	8.326	8.459	8.003	8.449	8.674
C10orf27	4.827	5.138	5.044	5.152	4.881	4.685	4.777	4.648	4.314	4.641	5.195	4.851	4.673	5.379	4.483	4.504	4.772	4.512	4.449	4.824
C10orf28	10.531	10.941	10.541	9.152	9.77	9.772	9.84	9.198	9.553	9.834	10.631	10.543	10.548	9.717	9.322	9.507	9.746	9.393	9.668	9.965
C10orf30	7.984	8.11	8.093	7.973	8.041	8.14	7.961	7.888	7.741	8.586	7.77	7.666	7.833	7.998	7.622	7.768	8.073	8.173	7.929	8.541
C10orf33	10.067	11.137	12.057	8.368	8.933	9.024	9.494	9.279	9.455	9.561	10.553	11.523	11.95	9.068	8.905	9.013	9.63	9.236	9.608	9.563
C10orf35	11.605	11.863	10.932	8.796	9.714	9.755	10.009	9.702	9.756	10.124	11.471	11.093	10.972	9.731	9.525	9.725	9.758	9.629	9.877	10.242
C10orf38	12.296	11.62	10.624	8.94	9.258	9.046	9.295	8.763	8.614	8.904	12.345	11.564	10.987	9.101	9.093	9.017	9	8.781	8.963	9.286
C10orf39	6.331	6.439	6.542	6.353	5.985	6.063	5.998	5.518	5.696	6.07	6.637	6.149	6.265	6.673	5.909	5.811	6.157	5.781	5.936	6.188
C10orf4	9.986	10.287	10.083	8.83	9.601	9.849	10.402	9.804	9.71	10.073	10.176	10.166	10.138	9.568	9.476	9.912	10.259	9.797	9.899	10.053
C10orf45	9.257	9.366	8.973	6.708	7.538	6.856	6.916	6.774	6.674	6.737	9.059	9.207	9.131	7.157	7.421	7.039	7.664	7.148	6.965	7.291
C10orf46	8.6	8.957	8.882	8.379	9.326	10.035	9.62	9.437	9.52	10.03	8.847	8.944	8.858	8.898	9.147	9.792	9.963	9.656	9.814	10.027
C10orf47	7.634	7.713	7.294	5.844	6.506	6.495	7.073	6.83	6.891	7.332	7.184	7.34	6.912	7.385	6.281	6.304	7.652	6.803	6.969	7.307
C10orf48	7.84	6.603	5.449	4.818	5.144	5.128	4.436	4.872	4.809	4.903	8.671	7.299	5.717	5.372	4.558	5.465	4.894	5.277	4.631	4.706
C10orf59	8.016	7.712	7.054	6.41	8.186	8.388	7.689	8.212	8.546	8.97	8.099	7.616	7.277	6.872	7.855	7.906	7.975	8.159	8.693	8.874
C10orf6	10.823	11.143	10.357	8.4	8.706	8.754	9.017	8.456	8.51	8.597	11.37	11.064	10.359	9.005	8.325	8.562	8.99	8.471	8.735	8.717
C10orf65	6.708	9.017	10.442	13.505	9.975	10.31	10.321	9.966	10.613	12.859	6.95	9.662	10.567	14.347	10.629	10.485	9.749	11.35	10.918	13.141
C10orf7	12.51	12.704	12.55	12.89	12.84	12.774	12.939	12.479	12.717	13.01	12.861	12.276	12.628	13.344	12.631	12.771	13.02	12.563	12.957	13.184
C10orf74	11.768	11.583	11.043	10.056	10.231	10.067	10.126	9.792	9.652	10.045	11.644	11.332	11.232	10.181	10.127	9.932	10.153	9.94	9.952	10.165
C10orf76	5.376	5.76	5.434	4.955	5.141	5.548	5.078	5.15	5.909	5.519	5.595	5.384	5.47	5.469	4.876	5.178	5.301	5.422	6.154	5.738
C10orf77	9.685	10.62	9.946	8.435	8.997	9.312	9.334	9.002	9.513	9.744	9.749	9.735	9.764	9.133	8.967	9.254	9.423	9.331	9.859	9.78
C10orf79	9.291	9.463	9.375	8.726	8.772	8.903	9.061	8.694	8.288	8.497	9.047	8.926	9.341	9.202	8.732	9.016	9.145	9.347	8.695	8.564
C10orf83	9.739	8.818	7.645	5.671	7.804	7.708	7.907	7.775	8.147	8.451	9.111	8.684	8.197	6.509	7.728	7.47	7.492	7.483	7.992	8.248
C10orf84	10.589	10.467	9.912	9.068	9.712	9.798	9.957	9.499	9.56	9.845	10.803	10.379	9.94	9.697	9.569	9.641	9.974	9.662	9.746	9.92
C10orf86	9.835	10.026	9.565	7.762	8.742	8.98	9.015	8.67	8.618	9.004	9.834	9.733	9.665	8.724	8.862	9.004	9.221	8.806	8.917	9.141
C10orf88	11.195	11.018	10.295	9.551	9.708	9.781	9.844	9.592	9.387	9.712	11.011	10.722	10.348	10.086	9.546	9.645	9.928	9.653	9.579	9.768
C10orf89	7.769	8.936	8.914	7.127	8.46	8.347	8.945	7.956	8.212	7.877	8.072	8.748	8.553	7.62	8.264	7.867	8.626	7.706	8.283	7.765
C10orf9	8.165	7.782	7.375	6.127	6.265	6.264	6.077	5.836	5.816	6.355	8.251	7.611	7.519	6.524	6.103	6.148	6.411	6.252	6.281	6.56
C10orf92	5.73	5.712	5.518	5.091	5.143	5.405	5.161	4.842	5.458	5.432	5.727	5.242	5.18	5.267	4.952	5.015	5.254	5.037	5.538	5.5
C10orf97	10.578	10.182	9.426	7.993	8.423	8.266	8.458	8.167	8.263	8.517	10.099	9.79	9.355	8.52	8.537	8.388	8.33	8.508	8.657	8.798
C11orf16	6.424	6.695	5.635	4.896	4.702	4.776	4.861	4.9	5.371	5.31	6.878	6.041	5.245	5.332	4.907	4.577	5.159	4.933	5.568	5.453
C11orf2	9.26	9.435	9.549	9.191	9.987	10.73	9.929	9.83	10.007	10.415	9.12	9.318	9.467	9.463	9.876	10.223	9.997	9.848	10.207	10.28
C11orf24	10.088	10.501	9.844	9.088	9.411	9.713	9.173	8.904	9.019	9.421	10.312	10.358	10.129	9.724	9.038	9.208	9.333	8.92	9.304	9.294
C11orf30	5.498	5.732	5.839	5.493	5.631	5.751	5.536	5.147	5.427	5.442	6.006	5.511	5.505	5.902	5.425	5.31	5.708	5.348	5.42	5.479
C11orf31	14.784	15.248	15.076	15.013	14.6	14.927	15.123	14.971	15.102	15.368	15.019	15.079	15.111	15.462	14.586	14.809	15.266	15.11	15.306	15.533
C11orf9	9.019	9.548	9.191	8.611	8.871	8.748	8.84	8.582	8.916	8.723	9.471	9.182	9.101	9.526	8.673	8.99	9.245	8.563	8.824	8.815
C12orf10	9.346	9.824	9.937	9.457	9.895	10.19	9.819	9.518	10.359	10.465	9.513	9.506	9.778	9.853	9.625	9.693	9.766	9.603	10.46	10.301
C12orf22	10.35	9.937	9.507	7.981	8.935	8.897	8.948	8.156	8.389	8.503	10.453	9.781	9.188	8.432	8.822	8.625	8.941	8.539	8.613	8.496
C12orf5	5.023	5.966	4.909	5.968	7.106	6.83	6.553	6.109	6.373	6.782	5.535	5.758	5.271	7.016	6.881	6.911	6.609	6.485	6.511	6.982
C13orf1	9.757	10.055	10.012	10.186	9.884	10.403	10.497	10.532	10.555	10.898	9.64	9.86	10.068	10.588	9.866	10.25	10.654	10.649	10.751	11.108
C13orf12	13.727	14.032	13.707	14.111	14.326	14.346	14.782	14.022	14.106	14.413	13.781	13.816	13.807	14.52	14.188	14.216	14.554	14.157	14.384	14.472
C13orf18	5.323	5.509	5.772	4.573	4.867	4.779	4.883	4.817	5.323	4.638	5.459	5.599	5.697	4.582	4.499	4.58	4.712	4.866	5.326	4.773
C13orf21	10.397	8.739	7.746	5.537	5.768	5.554	5.284	5.438	5.361	6.106	8.823	8.481	7.875	5.819	5.501	5.458	5.492	5.504	5.68	6.056
C13orf23	10.158	10.177	9.444	8.779	9.123	9.033	9.136	8.519	8.611	8.824	10.09	9.72	9.578	9.123	8.971	8.906	8.966	8.626	8.649	8.862
C13orf25	9.679	8.796	8.172	8.487	6.777	6.463	6.494	5.921	5.991	5.513	9.725	8.987	7.872	7.846	6.662	5.807	6.363	6.077	5.885	5.724
C13orf6	6.829	7.029	6.663	6.522	6.903	6.9	6.976	6.341	6.487	6.791	6.987	6.863	6.824	7.145	6.89	6.825	6.647	6.685	6.735	7.097
C13orf7	9.967	10.242	9.268	8.093	8.645	8.83	8.682	8.321	8.256	8.496	9.973	9.782	9.605	9.037	8.414	8.807	8.782	8.379	8.638	8.681
C13orf8	7.654	7.649	7.375	7.218	8.231	8.255	8.138	8.115	7.184	7.629	7.707	7.547	7.838	7.869	7.782	7.961	8.344	8.187	7.471	7.41
C14orf1	7.893	7.869	7.802	7.104	7.225	7.608	7.523	7.228	7.386	7.465	8.098	7.909	7.714	7.341	7.458	7.591	8.112	7.52	7.729	7.234
C14orf10	9	8.937	8.535	7.876	8.59	8.519	8.752	8.298	8.433	8.539	8.853	8.651	8.727	8.325	8.469	8.782	9.085	8.682	8.773	8.78
C14orf100	9.209	9.124	8.704	6.254	7.347	7.323	7.302	6.795	6.728	7.126	8.648	8.991	8.108	7.905	7.342	7.545	7.344	7.279	6.771	7.33
C14orf101	6.926	6.889	6.642	5.45	5.423	5.435	5.123	4.905	5.713	5.653	7.237	6.543	6.383	6.051	5.344	5.118	5.275	5.324	6.052	5.822
C14orf103	9.782	10.128	9.635	10.507	9.844	9.87	10.167	9.576	9.665	10.009	9.949	9.8	9.781	10.262	9.479	9.63	9.985	9.645	9.772	10.187
C14orf104	8.937	9.141	8.612	7.734	8.315	8.475	8.78	8.022	8.14	8.747	8.932	8.835	8.88	8.44	7.95	8.22	8.463	8.045	8.382	8.766
C14orf106	9.3	8.85	8.275	5.029	6.538	6.745	7.002	6.451	6.36	6.05	9.461	8.516	7.885	6.066	6.796	6.87	6.884	6.398	6.358	6.294
C14orf108	7.552	7.349	6.989	6.057	6.968	6.853	6.943	6.443	6.664	6.77	7.667	7.078	6.91	6.688	6.744	6.529	6.928	6.539	6.739	6.701
C14orf112	10.207	10.601	10.218	9.278	9.771	9.994	10.258	9.713	9.891	10.269	10.359	10.357	10.254	10.275	9.73	9.89	10.274	10.084	10.396	10.313
C14orf114	7.806	7.5	7.357	6.919	7.099	7.162	7.375	7.047	7.127	7.03	7.506	7.56	7.154	7.074	7	7.122	7.738	6.756	7.357	7.181
C14orf115	5.661	5.173	5.633	5.375	5.322	5.17	4.973	5.157	5.338	5.559	5.62	5.323	5.377	5.482	5.143	4.887	5.198	5.336	5.416	5.581
C14orf118	7.284	7.541	7.39	7.032	7.006	6.92	6.87	7.026	6.85	7.08	7.388	7.282	7.064	7.473	6.965	6.974	7.138	7.241	6.962	7.185
C14orf119	10.954	10.987	10.117	8.942	9.454	9.451	9.314	8.789	8.924	9.464	10.7	10.578	10.343	9.573	9.327	9.323	9.382	8.952	9.11	9.413
C14orf120	11.875	12.231	11.789	11.688	11.48	11.474	11.673	11.042	11.232	11.59	12.026	11.946	11.758	12.344	11.166	11.395	11.591	11.373	11.526	11.66
C14orf122	11.428	11.434	11.879	12.261	13.063	13.255	12.837	12.497	12.608	13.075	11.57	11.812	12.217	12.46	12.724	12.738	12.967	12.462	12.699	12.835
C14orf125	11.21	11.305	11.024	11.183	11.038	11.034	11.272	10.869	10.686	11.231	11.255	11.115	11.124	11.118	10.731	11.09	11.409	11.074	11.03	11.472
C14orf126	5.594	6.261	5.749	4.533	4.408	4.789	4.618	4.764	4.799	4.971	6.175	5.581	5.363	5.006	4.339	4.706	4.919	5.136	4.807	5.051
C14orf129	6.158	6.391	6.068	5.337	7.409	7.944	7.921	7.502	7.887	7.94	6.13	6.569	6.627	6.086	7.467	7.614	7.966	7.659	8.134	8.102
C14orf130	9.79	9.443	9.377	8.634	9.71	10.06	10.062	9.548	9.796	9.984	9.484	9.196	9.381	9.144	9.668	9.756	10.178	9.628	9.992	9.947
C14orf132	13.008	11.677	10.708	9.661	9.584	8.648	8.156	8.381	8.038	9.029	12.164	11.14	11.198	9.175	9.223	8.801	8.941	8.577	8.661	9.205
C14orf133	12.201	12.555	12.078	10.967	11.207	11.301	11.302	10.868	10.914	11.332	12.399	12.138	12.033	11.457	11.106	11.137	11.574	10.975	11.328	11.478
C14orf138	9.595	9.941	10.092	8.667	9.256	9.491	9.372	9.065	8.972	9.209	9.674	9.809	9.928	8.788	9.115	9.272	9.358	9.098	8.968	9.209
C14orf140	4.067	4.252	4.592	4.637	5.137	4.702	4.521	4.751	4.405	4.93	4.579	4.191	4.552	5.571	4.778	4.387	4.587	4.61	4.602	5.1
C14orf143	5.55	6.049	6.154	5.578	5.221	5.334	5.39	5.056	5.481	5.52	6.061	5.597	5.766	5.875	4.922	5.076	5.353	5.005	5.733	5.519
C14orf145	8.221	7.636	7.494	5.313	5.583	5.508	5.804	5.352	5.814	6.016	8.052	7.677	6.918	5.934	5.068	5.531	5.662	5.433	5.809	6.021
C14orf147	10.757	10.692	10.365	10.559	10.988	11.252	11.723	11.065	11.387	11.212	10.465	10.774	10.166	11.035	10.919	10.953	11.149	10.748	11.336	11.151
C14orf150	8.575	8.656	8.029	8.105	8.346	8.34	8.453	7.94	7.948	8.3	8.657	8.454	8.116	8.94	8.145	8.092	8.35	8.152	8.225	8.245
C14orf153	11.838	12.174	12.371	12.848	12.917	13.039	13.288	12.577	12.769	12.915	12.043	11.84	12.173	13.203	12.752	12.737	13.244	12.773	12.958	12.969
C14orf161	5.326	5.38	5.719	6.452	6.212	6.153	5.978	5.759	5.85	5.985	5.665	5.17	5.521	6.633	6.058	5.979	6.042	6.001	6.004	6.245
C14orf162	8.053	4.809	4.652	4.499	4.706	4.577	4.739	4.392	4.813	4.599	5.103	4.53	4.88	4.812	4.505	4.595	4.594	4.786	4.862	4.581
C14orf166	15.043	15.187	14.686	14.071	14.155	14.316	14.466	14.177	14.097	14.367	15.131	14.95	14.668	14.82	14.228	14.299	14.605	14.316	14.422	14.569
C14orf168	8.085	8.421	7.894	5.928	6.723	6.882	6.72	6.364	6.6	6.746	8.378	8.369	7.671	7.004	6.522	6.818	6.842	6.728	6.934	6.998
C14orf2	11.265	11.738	11.588	12.05	12.061	12.359	12.088	11.828	11.984	12.6	11.419	11.433	11.346	12.288	12.201	12.055	12.189	12.002	12.44	12.384
C14orf24	7.894	7.975	8.119	6.977	7.448	7.31	7.051	7.057	7.197	7.641	7.726	7.922	7.845	7.352	7.468	7.349	7.433	7.362	7.519	7.772
C14orf28	5.84	5.74	6.174	5.231	5.383	5.951	5.958	5.531	5.568	5.633	5.831	5.82	5.957	5.479	5.105	5.722	6.108	5.841	6.046	5.678
C14orf29	9.006	8.813	8.612	7.859	8.497	7.955	7.436	7.467	7.705	7.776	8.394	8.029	8.403	7.844	8.403	7.803	7.782	7.586	7.9	8.074
C14orf32	12.165	13.286	12.591	10.93	11.348	11.502	11.248	11.21	10.672	11.196	12.873	12.861	12.642	11.786	11.255	11.568	11.384	11.49	10.94	11.26
C14orf35	10.594	11.222	11.378	11.07	11.448	11.841	11.954	11.657	11.494	11.789	10.539	11.258	11.39	11.427	11.162	11.694	11.931	11.732	11.636	11.867
C14orf4	4.406	4.617	4.637	4.818	4.946	4.868	4.508	4.379	4.87	4.742	4.881	4.092	4.409	4.968	4.699	4.597	4.816	4.556	5.076	5.002
C14orf43	9.935	10.54	10.399	8.422	9.221	9.536	9.457	9.147	9.224	9.796	10.308	10.271	10.148	9.055	8.711	9.205	9.618	9.225	9.407	9.792
C14orf44	6.982	6.901	6.849	6.59	6.91	7.231	7.037	6.986	6.999	7.069	7.254	6.764	7.014	7.293	6.982	7.248	7.318	7.281	7.215	7.097
C14orf49	4.237	4.744	4.727	4.802	4.625	4.839	4.458	4.891	5.565	5.604	4.614	4.323	4.472	4.711	4.586	4.683	4.396	4.471	5.58	5.571
C14orf50	8.849	9.059	8.678	6.537	6.877	6.225	6.682	6.239	6.543	7.436	9.139	9.471	8.837	6.954	6.431	6.209	6.33	6.915	6.59	7.802
C14orf58	6.22	6.592	6.432	5.104	5.024	4.516	4.487	4.817	4.976	4.682	6.684	6.479	6.438	5.056	4.653	4.395	4.645	4.964	4.912	4.967
C14orf68	8.422	8.735	8.952	8.42	8.392	8.594	8.174	7.845	8.034	8.223	8.667	8.463	8.684	8.848	8.112	8.126	8.24	8.071	8.281	8.152
C14orf92	9.436	9.531	9.15	9.198	9.351	9.59	9.591	9.345	9.354	9.58	9.645	9.235	9.122	9.631	9.243	9.482	9.532	9.495	9.416	9.686
C14orf93	8.963	9.577	9.382	7.387	7.407	7.42	7.833	6.985	7.452	7.685	9.223	8.927	9.021	7.865	7.354	7.268	7.721	7.178	7.63	7.719
C14orf94	10.011	10.151	10.006	8.686	9.115	8.888	9.184	8.39	9.085	8.769	10.333	9.844	9.862	9.119	9.085	8.897	9.408	8.715	9.456	8.773
C15orf15	10.719	10.801	10.173	9.26	9.685	9.801	10.197	9.635	9.509	9.498	10.695	10.498	10.139	9.866	9.513	9.66	10.069	9.7	9.626	9.597
C15orf23	9.42	9.146	8.903	8.511	8.664	8.861	8.626	8.298	8.387	8.911	9.623	9.168	8.74	8.908	8.54	8.631	8.626	8.44	8.618	9.021
C15orf24	11.746	12.284	11.771	12.39	12.598	12.592	12.638	12.142	12.246	12.515	11.868	11.932	12.049	12.759	12.365	12.401	12.405	12.237	12.395	12.514
C15orf27	5.468	5.545	6.003	5.493	5.958	6.003	5.907	5.43	5.677	5.837	5.892	5.356	5.699	6.067	5.633	5.731	6.062	5.755	5.735	5.733
C16orf33	11.892	12.316	11.746	12.576	12.996	13.443	13.431	13.048	13.337	13.622	12.253	11.928	11.936	13.259	13.09	13.168	13.38	13.094	13.574	13.626
C16orf34	12.651	12.925	11.834	10.099	10.303	10.53	10.573	10.21	10.062	10.162	12.988	12.344	11.979	11.329	10.104	10.439	10.782	10.453	10.485	10.447
C16orf5	10.852	11.575	12.12	10.733	11.885	12.528	12.304	11.685	11.661	12.223	10.992	11.41	11.847	11.048	11.779	12.151	12.314	11.705	11.846	12.039
C16orf7	9.398	9.859	9.715	8.021	9.037	9.088	9.118	8.585	9.003	9.02	9.442	9.367	9.558	8.782	8.997	8.814	9.231	8.907	9.337	9.007
C17orf28	5.237	5.582	6.042	5.097	5.393	5.552	5.161	5.062	5.359	5.727	5.308	5.405	5.829	5.728	5.188	5.067	5.509	5.336	5.425	5.672
C17orf31	10.807	10.98	10.704	9.325	10.072	10.548	10.616	9.853	10.126	10.374	11.001	10.629	10.603	9.842	9.82	10.149	10.669	9.902	10.391	10.403
C17orf32	10.222	10.175	9.956	8.236	9.209	9.271	9.609	8.897	9.026	9.328	10.348	9.979	9.91	9.553	9.014	9.265	9.396	9.087	9.471	9.484
C17orf37	10.511	10.956	10.616	10.039	9.952	10.506	10.158	10.089	10.265	10.612	10.766	10.688	10.578	10.409	9.828	10.172	10.281	10.06	10.486	10.566
C17orf39	6.143	6.029	5.824	6.27	6.453	6.696	6.239	6.376	6.482	6.942	6.365	5.814	5.777	6.431	6.217	6.531	6.262	6.548	6.614	7.065
C18orf10	10.074	10.388	9.87	8.595	8.708	8.968	8.513	8.323	8.619	9.245	10.277	10.2	9.895	9.425	8.812	8.879	8.601	8.634	8.93	9.293
C18orf17	8.144	7.54	7.518	7.629	7.569	7.374	7.56	7.368	7.172	7.752	7.669	6.762	7.445	7.786	7.457	7.437	7.749	7.883	7.473	8.288
C18orf21	10.08	10.288	10.644	10.546	10.664	10.382	10.938	10.119	10.324	10.553	10.638	10.283	10.399	11.03	10.408	10.288	10.988	10.417	10.675	10.632
C18orf24	7.658	6.757	6.753	4.77	5.343	5.248	5.248	5.094	5.123	5.18	8.329	7.219	6.766	4.919	5.332	4.986	5.328	5.428	5.51	5.34
C18orf25	7.895	8.001	7.807	7.425	8.01	8.255	7.922	7.62	7.671	7.947	8.025	7.842	7.73	8.008	7.81	7.835	8.091	7.867	7.861	7.912
C18orf37	9.94	10.375	10.581	9.826	10.364	10.607	10.835	10.268	10.564	10.462	10.141	10.442	10.389	10.188	10.071	10.2	10.656	10.185	10.632	10.4
C18orf4	8.003	7.589	6.927	5.745	5.979	5.633	5.344	5.683	5.565	5.637	8.12	7.519	7.202	6.2	5.943	5.758	5.649	5.696	5.928	5.863
C19orf10	10.324	10.674	10.7	8.376	8.876	8.707	8.563	8.455	8.512	8.738	10.39	10.481	10.647	9.06	8.832	8.495	8.873	8.6	8.817	8.775
C19orf12	8.628	8.395	7.315	5.533	6.153	6.303	6.386	6.072	6.282	6.454	8.47	7.752	7.507	6.273	6.113	6.392	6.479	6.234	6.6	6.977
C19orf2	8.656	8.82	8.628	7.961	8.203	8.603	8.546	8.181	8.453	8.587	8.984	8.787	8.582	8.334	8.152	8.494	8.589	8.552	8.668	8.791
C19orf20	11.041	11.498	11.31	10.956	11.319	11.533	11.375	10.984	11.33	12.035	11.131	11.143	11.194	11.203	11.077	11.12	11.336	11.14	11.608	11.798
C19orf24	10.658	11.54	11.026	10.919	10.938	10.91	10.597	10.315	10.263	11.081	11.004	11.235	10.927	11.382	10.626	10.507	10.584	10.612	10.641	11.071
C19orf25	5.544	5.996	6.078	5.45	5.499	5.566	5.467	5.206	5.668	5.834	5.66	5.73	5.916	5.653	5.287	5.32	5.568	5.37	5.762	5.895
C19orf27	11.239	11.52	11.736	11.623	12.344	12.74	12.201	11.94	12.149	12.622	11.499	11.369	11.415	12.049	12.244	12.238	12.361	12.128	12.433	12.432
C19orf28	9.254	9.784	9.583	8.44	8.847	9.027	8.746	8.48	8.589	8.89	9.496	9.273	9.319	9.061	8.501	8.723	8.992	8.687	8.826	8.886
C19orf32	5.505	6.005	6.185	5.244	5.534	5.078	5.225	4.756	5.386	5.655	5.67	5.567	5.976	5.389	5.266	4.827	5.467	5.058	5.62	5.381
C19orf4	13.054	10.61	7.481	5.442	5.819	6.05	5.599	5.693	6.479	6.799	12.674	9.832	7.671	5.943	5.586	5.618	5.47	5.786	6.585	7.007
C19orf6	8.527	9.038	9.184	10.043	9.742	10.227	9.562	9.345	9.251	9.909	8.63	9.024	9.103	10.197	9.568	9.65	9.821	9.458	9.574	9.88
C19orf7	11.472	11.09	11.244	10.886	10.776	10.691	10.682	10.083	10.071	10.466	11.472	11.056	11.1	10.754	10.505	10.577	10.713	10.278	10.293	10.509
C1GALT1C1	8.687	9.196	8.94	7.28	8.123	8.498	8.605	8.119	8.377	8.406	8.789	9.051	9.099	8.38	8.17	8.393	8.503	8.261	8.522	8.599
C1QA	11.659	13.109	11.827	10.366	12.205	11.908	11.241	11.329	12.064	12.191	11.683	12.551	12.538	11.045	12.01	11.909	11.341	11.153	12.203	12.185
C1QB	10.742	12.351	10.829	9.176	10.851	10.6	9.918	10.281	10.696	11.033	10.801	11.734	11.681	10.06	10.696	10.902	10.001	10.119	10.726	10.983
C1QBP	10.473	10.368	9.959	10.133	9.679	9.811	9.878	9.206	9.375	9.54	10.637	10.058	9.897	10.853	9.621	9.537	10.017	9.362	9.665	9.591
C1QDC1	7.596	7.541	7.197	5.842	5.849	5.819	5.591	5.45	5.655	5.718	7.81	7.195	7.067	6.25	5.675	5.639	5.832	5.626	5.681	5.695
C1QG	9.54	11.704	10.413	8.591	10.114	9.895	9.113	9.372	9.818	10.161	9.512	11.11	11.13	9.36	9.8	9.754	9.28	9.203	9.936	9.991
C1QL2	7.361	7.059	6.798	6.027	6.029	6.267	5.465	5.806	6.018	6.237	7.581	7.169	6.861	6.591	5.935	5.922	5.758	6.252	6.303	6.372
C1QR1	10.032	10.9	11.521	8.491	9.492	9.426	8.652	9.207	9.152	9.06	10.035	10.896	11.41	9.181	9.438	8.947	9.278	9.189	9.416	8.936
C1QTNF1	11.645	11.639	11.564	10.685	12.14	12.466	11.733	11.598	12.115	12.021	11.784	10.945	11.801	11.313	12.129	12.195	12.107	11.475	12.426	12.054
C1QTNF2	10.144	9.527	8.25	4.393	5.81	7.189	6.51	6.526	7.272	7.465	9.971	9.417	9.008	6.094	6.235	7.043	6.981	6.63	7.645	7.283
C1QTNF5	11.93	12.686	12.405	10.642	10.603	10.238	9.884	10.039	10.34	10.395	12.062	12.52	12.502	10.371	10.464	10	10.13	10.012	10.646	10.206
C1QTNF7	6.132	5.934	6.194	5.02	5.276	5.258	5.12	5.05	4.891	5.064	5.787	5.688	6.068	5.639	5.001	5.014	5.345	4.963	5.018	5.048
C1QTNF8	5.484	5.542	6.227	5.5	5.887	5.755	5.033	5.243	5.577	5.535	6.12	5.465	5.996	5.761	5.764	5.309	5.419	5.256	5.737	5.527
C1R	6.194	7.311	6.55	5.884	6.667	6.696	6.58	6.397	6.254	6.291	6.64	6.881	6.776	6.245	6.441	6.682	6.782	6.314	6.43	6.355
C1S	10.905	12.752	11.771	11.6	12.547	12.421	12.327	11.855	12.182	12.174	10.772	12.035	12.568	12.329	12.374	12.615	12.595	11.907	12.466	12.591
C1orf14	5.296	5.197	4.878	4.685	4.672	4.548	4.61	4.529	4.756	4.935	5.905	5.212	4.627	4.775	4.546	4.601	4.985	4.658	5.139	4.796
C1orf16	9.755	9.662	9.309	8.316	8.65	9.067	8.852	8.541	8.424	8.749	9.827	9.282	9.143	8.864	8.178	8.659	8.943	8.65	8.628	8.748
C1orf21	12.18	11.779	12.749	12.647	12.219	12.169	11.89	11.775	11.857	12.094	12.194	11.881	12.463	12.625	12.157	11.909	12.005	11.986	12.134	12.032
C1orf22	7.248	6.952	6.753	6.137	6.375	6.797	6.523	6.47	6.638	6.987	7.369	6.801	6.59	6.654	6.398	6.574	6.812	6.7	7.013	6.807
C1orf24	13.309	14.247	13.664	11.512	12.185	12.412	11.879	11.73	12.019	11.971	13.864	14.146	13.707	11.702	12.063	11.899	12.23	11.715	12.348	11.878
C1orf25	10.228	10.885	10.803	10.322	11.501	11.96	11.834	11.639	11.895	12.215	10.491	10.725	10.672	10.854	11.356	11.77	11.863	11.717	12.047	12.149
C1orf26	7.824	7.796	7.294	6.79	6.636	6.591	6.775	6.52	6.508	7.041	7.898	8.027	7.881	6.778	7.068	7.067	7.071	6.904	6.73	6.994
C1orf32	5.033	4.806	4.697	4.506	4.809	5.194	4.501	4.396	4.661	4.429	4.604	4.656	4.376	4.819	4.67	4.518	4.693	4.652	4.626	4.699
C1orf34	10.662	10.774	10.521	10.421	10.374	10.688	11.057	9.986	10.019	10.146	10.652	10.833	10.562	10.716	10.309	10.5	10.54	10.051	10.292	10.401
C1orf35	10.97	11.586	10.989	10.696	10.347	10.318	10.587	10.039	10.311	11.117	11.393	11.178	10.716	11.22	10.116	10.078	10.537	10.257	10.507	11.046
C1orf37	11.132	11.571	10.812	10.416	10.752	10.728	10.413	10.297	10.374	10.578	11.315	11.419	10.963	10.912	10.531	10.504	10.132	10.257	10.285	10.538
C1orf38	4.995	5.095	4.97	4.423	5.007	4.975	4.519	4.501	5.073	4.938	5.24	4.632	4.789	4.768	4.719	5.51	4.815	5.04	5.165	5.187
C1orf41	10.941	11.428	11.344	9.84	10.299	10.706	10.593	10.509	10.259	10.733	11.442	11.662	11.027	10.508	10.282	10.403	10.44	10.512	10.472	10.698
C1orf43	10.819	11.001	10.606	10.437	11.035	11.27	11.249	10.938	11.013	11.293	10.911	10.8	10.716	10.894	10.992	11.014	11.27	11.013	11.171	11.288
C1orf9	8.382	9.315	8.873	7.545	8.277	7.919	8.041	7.624	7.336	8.198	9.547	9.331	8.177	8.308	8.392	7.859	8.286	7.857	7.724	7.724
C2	7.683	8.229	7.011	6.376	7.041	7.205	7.021	6.58	7.332	7.498	7.824	7.628	6.976	6.74	6.634	7.266	7.084	6.741	7.694	7.804
C20orf10	8.171	7.647	6.634	6.783	6.757	6.58	6.752	6.264	7.344	7.151	7.71	7.252	6.806	7.695	6.443	6.377	6.813	6.788	7.55	7.296
C20orf100	7.989	7.379	6.932	6.262	6.085	6.253	5.881	5.991	6.071	6.175	7.001	6.694	6.811	6.69	5.92	6.247	6.033	6.219	6.298	6.254
C20orf102	12.59	12.8	12.625	12.038	12.064	12.182	12.274	11.602	11.61	11.839	12.769	12.414	12.693	12.397	11.882	12.057	12.194	11.675	11.791	11.859
C20orf106	5.802	6.254	6.185	5.543	5.65	5.757	5.24	5.353	5.29	5.538	6.161	5.607	5.918	6.052	5.354	5.294	5.375	5.607	5.421	5.387
C20orf108	9.262	10.12	10.684	11.528	12.933	13.066	12.899	13.012	12.752	13.093	9.048	9.227	10.659	11.679	12.524	12.704	12.915	12.664	12.646	13.068
C20orf11	9.983	10.444	10.142	9.363	9.585	9.397	9.758	8.761	8.71	8.498	10.144	10.09	10.397	9.727	9.474	9.417	9.395	8.755	8.756	8.669
C20orf111	9.927	10.079	10.357	10.841	10.437	10.376	10.395	9.997	9.994	10.316	10.291	9.798	9.904	10.49	10.145	9.869	10.486	10.164	10.127	10.372
C20orf112	7.738	8.226	6.855	4.55	5.25	5.267	6.2	4.533	5.42	5.291	7.808	7.328	6.855	4.779	5.157	4.968	6.539	4.881	5.513	5.375
C20orf116	10.664	11.366	11.397	11.711	11.727	11.741	11.886	11.343	11.597	11.984	10.296	10.763	10.86	11.814	11.089	11.255	11.751	11.36	11.619	11.723
C20orf117	8.372	8.419	8.144	6.398	6.736	6.702	6.293	6.235	6.419	6.644	8.65	8.173	7.944	6.87	6.593	6.325	6.629	6.441	6.665	6.682
C20orf12	8.716	8.09	7.33	6.459	6.83	6.703	6.852	6.526	6.998	7.222	8.463	7.323	7.254	6.995	6.702	6.57	7.035	6.838	7.291	7.369
C20orf121	5.878	5.991	6.136	5.873	5.433	5.471	5.288	5.034	5.55	5.638	6.34	5.683	5.804	6.015	5.274	5.201	5.566	5.366	5.814	5.562
C20orf123	4.738	5.162	5.196	5.065	4.88	4.824	4.599	5.035	5.235	5.347	5.153	4.839	4.872	5.331	4.662	4.911	4.937	4.657	5.356	5.353
C20orf13	9.129	8.727	8.357	6.635	7.372	7.354	7.833	7.313	7.556	7.393	8.91	8.506	8.591	7.603	7.384	7.315	7.632	7.225	7.57	7.54
C20orf135	4.65	5.666	5.084	5.04	4.624	4.858	4.92	4.792	5.291	5.083	5.28	5.503	4.961	4.773	4.725	4.841	4.815	5.021	5.219	5.065
C20orf14	13.129	13.782	13.67	13.194	13.16	13.233	13.14	12.852	12.938	13.198	13.496	13.396	13.511	13.652	12.917	13.129	13.31	13.028	13.198	13.302
C20orf142	7.951	8.269	8.191	8.315	8.395	8.362	8.091	7.987	7.988	8.259	8.193	7.949	8.072	8.645	8.088	8.079	8.195	8.162	8.264	8.209
C20orf152	4.519	5.553	5.197	4.872	5.064	4.757	4.891	4.633	5.066	5.1	4.624	4.826	5.085	5.119	4.885	4.599	4.936	4.725	5.139	5.156
C20orf155	10.589	11.166	10.516	10.509	10.842	10.826	10.884	10.534	10.689	11.123	10.951	10.383	10.386	10.833	10.439	10.622	10.748	10.47	10.769	11.142
C20orf161	6.657	6.823	6.911	6.878	6.565	6.545	6.45	6.225	6.342	6.534	6.931	6.533	6.61	7.084	6.335	6.199	6.561	6.514	6.557	6.628
C20orf172	10.832	10.339	9.217	6.681	8.005	8.056	8.071	7.721	7.803	7.935	10.793	9.839	9.188	7.583	7.503	7.794	8.202	7.688	8.019	7.985
C20orf175	9.576	8.912	8.738	8.718	8.053	8.054	7.719	7.466	7.63	8.163	9.594	8.7	8.565	8.841	7.722	7.553	7.597	8.187	7.833	8.069
C20orf177	4.673	4.897	5.113	4.367	4.528	4.445	4.769	4.698	5.018	4.865	4.803	4.948	4.785	4.55	4.516	4.526	4.797	4.743	5.03	4.912
C20orf179	5.648	6.003	6.088	5.796	5.887	5.915	5.45	5.419	5.519	5.712	6.138	5.669	5.713	6.2	5.706	5.627	5.806	5.613	5.872	5.698
C20orf18	10.844	12.049	11.371	11.046	11.872	12.024	12.025	11.581	11.986	11.927	11.287	11.514	11.541	11.576	11.803	12.058	12.14	11.856	12.254	12.156
C20orf185	6.714	7.01	7.282	6.992	6.48	6.648	6.394	6.191	6.207	6.464	7.037	6.837	7.161	7.095	6.289	6.393	6.556	6.427	6.485	6.462
C20orf194	6.509	6.548	8.35	8.74	8.886	9.346	9.624	9.317	8.679	9.081	6.491	6.26	7.773	9.772	9.273	9.257	9.18	9.077	8.79	8.98
C20orf20	12.142	12.324	11.327	8.979	10.595	10.646	11.047	10.268	10.344	10.319	12.302	11.962	11.72	9.969	10.192	10.403	10.962	10.382	10.429	10.424
C20orf22	9.567	9.661	9.481	8.545	9.012	8.722	8.736	8.282	8.786	8.89	9.731	9.473	9.324	9.099	8.858	8.626	8.859	8.318	8.973	8.915
C20orf24	9.071	9.307	9.083	9.186	9.42	9.562	9.361	9.004	9.161	9.439	9.503	8.986	9.075	9.635	9.282	9.258	9.537	9.204	9.446	9.496
C20orf27	11.182	11.816	11.255	10.576	11.249	11.688	11.128	11.163	11.398	11.686	11.489	11.343	11.305	11.293	11.265	11.431	11.432	11.416	11.623	11.75
C20orf29	4.673	5.296	4.948	5.078	4.893	4.94	4.724	4.807	4.718	5.27	5.484	4.797	4.697	5.547	4.749	4.79	5.104	5.054	5.066	5.282
C20orf31	10.815	11.655	10.89	9.072	10.302	10.146	10.088	9.649	9.922	10.44	11.021	11.118	11.062	10.027	10	9.919	10.142	9.743	10.209	10.599
C20orf36	8.244	8.525	8.612	9.266	8.758	8.661	8.948	8.266	8.499	9.039	8.347	8.225	8.404	9.187	8.28	8.37	9.132	8.471	8.808	9.456
C20orf38	3.96	4.227	4.416	4.265	4.591	4.523	4.432	4.17	4.897	4.892	4.049	4.659	4.245	4.582	4.486	4.125	4.669	4.985	5.132	4.936
C20orf4	10.312	10.768	10.453	9.326	10.363	10.425	10.588	9.98	10.319	10.196	10.486	10.353	10.518	10.015	10.367	10.427	10.379	10.195	10.582	10.422
C20orf43	10.776	11.201	11.076	10.456	10.85	11.156	11.044	10.624	10.756	11.096	10.955	10.852	10.912	10.97	10.75	11.022	10.934	10.733	10.967	11.111
C20orf44	6.239	6.895	6.715	6.521	7.043	6.854	7.327	6.74	6.924	6.872	6.676	6.601	6.607	6.836	7.28	7.053	7.366	7.008	7.171	7.081
C20orf45	11.855	12.055	11.267	11.561	11.618	11.971	11.895	11.452	11.631	11.813	11.641	11.811	11.421	12.228	11.618	11.844	11.822	11.725	11.897	11.887
C20orf46	5.116	5.174	5.439	5.05	5.255	5.323	5.214	5.134	5.258	5.84	5.052	4.69	5.256	5.634	5.143	5.088	5.231	5.46	5.378	5.605
C20orf54	6.478	6.432	6.778	6.749	6.989	7.02	6.476	6.26	6.403	6.637	6.739	6.293	6.396	7.082	6.696	6.653	6.789	6.626	6.576	6.669
C20orf55	12.313	12.027	10.91	9.203	8.917	8.927	8.655	8.474	8.743	8.792	12.817	11.486	10.879	9.544	8.903	8.948	8.997	8.778	9.119	8.954
C20orf59	5.483	6.055	4.822	4.746	5.326	4.84	4.77	4.846	4.891	5.102	5.557	6.205	5.369	5.525	5.181	4.591	4.716	4.689	4.915	5.311
C20orf6	8.248	8.358	7.813	7.173	7.68	7.452	7.601	7.129	7.435	7.454	8.381	8.369	7.83	7.746	7.431	7.426	7.537	7.468	7.654	7.482
C20orf7	10.538	10.781	10.259	9.698	10.291	10.201	10.276	9.917	10.406	10.393	10.515	10.939	10.391	10.355	10.4	10.097	10.36	10.32	10.647	10.544
C20orf70	16.983	17.113	16.68	16.218	15.365	15.404	15.471	14.945	14.962	15.505	17.096	16.846	16.452	17.014	15.351	15.265	15.718	15.264	15.584	15.609
C20orf72	10.5	10.429	9.536	7.167	8.246	8.48	8.89	8.22	8.585	8.566	10.792	9.803	9.521	8.127	8.376	8.515	8.827	8.198	8.73	8.562
C20orf77	11.731	12.534	12.072	11.478	11.854	12.121	11.766	11.845	11.468	11.748	12.118	12.153	12.242	12.305	11.477	12.004	12.177	11.872	11.707	11.892
C20orf79	5.282	6.059	5.652	4.761	4.905	4.717	4.965	4.62	5.082	4.811	5.56	5.876	5.884	4.975	4.693	4.442	4.959	4.931	5.101	4.848
C20orf82	8.378	7.299	7.359	7.705	7.221	7.18	6.784	6.764	6.736	7.136	8.138	7.045	7.271	7.829	7	6.984	7.187	6.98	7.038	7.122
C20orf85	6.139	5.861	6.255	6.385	6.236	6.216	6.186	5.961	5.927	6.026	6.092	5.633	6.258	6.322	5.998	5.995	6.173	6.129	6.101	5.934
C20orf96	6.312	5.884	5.459	4.571	4.551	4.722	4.27	4.587	4.701	4.588	6.338	5.742	5.205	4.761	4.173	4.553	4.717	4.474	4.798	4.6
C20orf98	6.076	6.003	5.975	5.79	6.285	6.349	5.785	5.292	6.007	6.291	6.218	5.713	5.827	5.86	5.804	5.866	5.92	5.596	6.214	6.084
C21orf18	7.991	7.864	7.399	6.332	7.183	7.388	7.011	7.11	7.769	8.636	7.915	7.631	7.03	7.117	7.109	6.972	6.994	7.252	7.91	8.294
C21orf25	8.296	8.766	7.797	7.053	7.105	7.384	7.002	6.867	6.993	7.532	8.32	8.298	7.935	7.498	7.08	7.211	7.281	6.979	7.42	7.91
C21orf33	11.836	12.676	12.33	12.593	12.687	12.865	12.844	12.654	12.706	12.905	12.165	12.022	12.267	13.042	12.894	12.942	13.435	13.081	13.312	13.286
C21orf34	8.828	8.456	7.665	5.336	6.143	6.783	7.372	6.49	6.85	6.484	8.945	7.876	7.378	6.752	5.63	6.537	7.182	6.459	6.94	6.44
C21orf45	9.766	8.842	7.735	4.775	5.229	4.904	4.748	4.897	5.535	4.943	9.74	8.675	7.827	4.756	5.198	4.626	4.912	4.791	5.794	5.013
C21orf5	8.849	10.048	10.311	8.78	9.174	8.986	9.172	8.744	8.698	9.092	8.728	9.816	10.074	9.031	8.876	8.75	9.331	8.735	8.818	9.057
C21orf56	5.118	5.375	4.972	4.689	5.487	5.821	5.386	5.105	5.41	5.737	5.517	5.242	4.863	5.187	5.222	5.38	5.432	5.117	5.709	5.521
C21orf58	5.024	5.568	5.848	4.816	4.963	4.783	4.899	4.914	4.831	5.076	5.328	5.224	5.592	5.15	4.869	4.81	5.253	5.01	4.958	5.041
C21orf6	8.131	8.803	9.208	8.885	10.382	10.685	10.818	10.433	10.397	10.801	8.315	8.825	9.025	10.145	10.207	10.586	10.714	10.358	10.535	10.873
C21orf62	9.659	10.12	10.32	10.311	10.31	10.618	10.434	10.054	10.334	10.696	9.927	9.882	10.081	10.752	10.13	10.18	10.488	10.29	10.687	10.55
C21orf63	4.433	4.939	4.683	4.594	4.425	4.823	4.308	4.26	4.575	4.964	4.518	4.685	4.7	4.367	4.527	4.679	4.766	4.628	4.621	4.95
C21orf66	12.428	12.191	11.702	11.563	11.508	10.804	11.275	10.518	10.339	10.942	12.315	11.93	11.548	11.35	10.924	10.292	11.007	10.49	10.341	10.789
C21orf7	9.279	9.937	9.534	5.964	8.056	7.691	8.235	7.07	7.009	7.06	9.616	10.773	9.571	6.729	8.168	7.282	7.154	7.073	7.014	7.152
C21orf91	5.28	5.54	5.425	4.701	5.165	5.219	5.091	4.796	4.837	5.009	5.461	5.608	5.336	5.195	4.904	5.096	5.082	4.694	4.669	4.588
C22orf13	13.794	14.736	14.817	14.077	14.263	14.466	14.457	13.877	14.004	14.145	14.117	14.558	14.792	14.864	14.227	14.389	14.55	14.215	14.369	14.307
C22orf16	12.264	14.185	14.211	15.713	16.383	16.826	16.518	16.353	16.254	16.559	11.813	13.3	14.53	16.152	16.348	16.289	16.642	16.528	16.644	16.457
C22orf18	9.562	9.085	8.1	5.606	7.201	6.717	6.338	5.941	6.684	6.483	9.661	8.834	7.97	5.991	7.03	6.278	6.353	5.904	6.772	6.338
C22orf19	12.626	12.601	11.947	11.166	11.139	11.658	11.899	11.29	11.41	11.707	12.651	12.16	12.172	11.608	10.99	11.608	11.902	11.568	11.592	12.017
C22orf3	12.302	12.613	12.326	11.954	12.215	12.394	12.322	11.859	12.224	12.417	12.6	12.212	12.134	12.334	12.108	12.101	12.418	12.111	12.534	12.399
C22orf5	7.944	8.028	7.794	6.704	6.963	7.175	6.676	6.594	6.612	7.06	8.16	8.097	7.792	6.887	6.864	7.094	6.966	6.742	6.964	7.135
C22orf8	10.032	9.846	9.444	7.496	8.184	8.181	8.453	7.493	7.769	8.034	10.105	9.385	9.065	7.983	8.204	8	8.275	7.671	7.863	8.05
C22orf9	10.1	9.731	9.626	9.52	8.554	8.535	8.365	8.034	8.373	8.632	9.886	9.654	9.556	9.544	8.431	8.262	8.504	8.256	8.595	8.641
C2orf11	11.384	11.213	10.604	9.028	9.401	8.907	8.833	8.442	8.492	8.651	11.564	10.919	10.498	9.317	9.116	8.637	9.019	8.579	8.736	8.662
C2orf13	9.974	9.878	9.561	8.13	8.119	8.427	8.541	8.35	8.078	8.839	10.011	9.651	9.124	8.307	7.881	8.223	8.376	8.294	8.246	8.857
C2orf17	13.566	14.06	13.641	13.169	13.336	13.579	13.363	13.26	13.081	13.636	13.666	13.576	13.647	13.633	13.074	13.41	13.348	13.469	13.285	13.774
C2orf18	11.009	10.273	9.339	5.071	6.523	5.62	5.043	6.116	6.15	5.5	11.179	9.963	9.089	4.925	6.484	5.165	5.075	5.685	6.27	5.566
C2orf23	11.67	10.522	10.175	8.776	10.97	11.63	11.05	11.221	11.425	11.635	11.248	10.542	9.8	9.401	10.867	11.482	11.295	11.216	11.574	11.532
C2orf24	6.346	6.459	6.471	5.969	5.661	5.63	5.545	5.335	5.538	5.887	6.689	6.172	6.398	6.318	5.574	5.433	5.728	5.471	5.712	6.148
C2orf25	12.259	12.563	12.128	12.717	12.686	12.663	12.704	12.47	12.558	12.788	12.402	12.464	12.271	13.211	12.628	12.712	12.607	12.642	12.709	12.89
C2orf28	10.673	11.382	10.953	10.546	11.264	11.369	11.328	10.852	11.272	11.756	10.884	11.051	11.137	11.254	11.015	11.165	11.394	10.962	11.597	11.686
C2orf29	12.962	13.173	12.821	12.017	12.711	12.693	12.802	12.305	12.422	12.644	13.103	12.76	12.891	12.755	12.47	12.656	12.757	12.41	12.682	12.77
C2orf3	8.765	8.946	8.655	7.246	7.917	8.051	8.307	7.589	7.909	7.776	8.659	8.906	8.204	8.174	7.734	7.846	8.397	7.704	8.028	7.85
C2orf30	10.476	10.742	10.003	9.237	9.879	10.175	10.155	9.976	9.928	10.225	10.823	10.669	10.327	9.785	9.73	9.954	10.208	9.945	10.054	10.243
C2orf32	12.542	12.18	12.075	9.918	10.058	10.081	10.59	10.249	9.776	9.824	12.417	11.743	11.999	10.609	9.881	9.975	10.477	10.075	9.986	9.919
C2orf33	10.426	11.453	11.096	9.18	10.24	10.73	10.297	10.048	10.037	10.421	10.831	10.789	10.716	10.388	10.286	10.363	10.442	10.151	10.24	10.347
C2orf4	8.502	9.276	8.402	8.861	8.596	9.622	9.44	9.268	9.068	9.691	9.317	9.07	8.968	9.771	9.812	9.364	9.593	9.624	9.6	9.366
C2orf7	10.681	11.53	11.579	11.924	12.237	12.203	12.224	11.588	12.188	12.381	10.869	11.111	11.503	12.634	12.032	12.054	12.231	11.849	12.453	12.371
C3	7.089	6.89	5.259	5.449	5.931	6.762	6.466	6.273	7.521	6.918	7.156	6.18	5.835	6.068	5.895	6.646	6.853	6.648	7.897	7.273
C3AR1	6.693	6.936	6.716	6.962	6.627	6.702	6.467	6.119	6.447	6.558	7.191	6.447	6.562	7.085	6.243	6.295	6.627	6.243	6.472	6.498
C3F	5.636	6.334	7.314	8.61	8.236	8.422	8.229	7.98	8.232	8.465	6.02	6.068	7.067	8.482	7.895	8.142	8.481	8.315	8.792	8.656
C3orf1	9.004	7.968	8.291	7.046	7.867	8.417	8.324	7.971	7.285	7.809	8.621	8.893	7.101	8.862	7.927	8.05	8.246	8.143	7.572	7.53
C3orf10	10.997	11.33	10.827	9.106	9.607	9.45	9.886	9.262	9.295	9.611	11.083	10.952	10.884	9.6	9.43	9.24	10.028	9.365	9.577	9.767
C3orf15	6.915	6.723	6.312	4.65	5.645	5.394	5.841	5.253	5.493	5.698	6.882	6.666	6.167	5.245	5.441	5.144	6.138	5.395	5.7	5.809
C4BPA	6.166	5.504	5.328	5.141	5.368	5.22	4.846	5.084	4.94	5.549	6.136	5.653	4.984	5.59	5.196	4.898	5.206	5.076	5.135	5.409
C4orf14	8.842	8.889	8.492	9.669	9.146	9.089	8.94	8.76	8.552	9.041	8.858	8.502	8.485	9.741	8.763	8.868	9.197	8.887	8.914	9.142
C4orf16	6.801	6.868	6.061	5.343	6.21	6.305	6.187	5.617	6.372	6.582	6.856	6.439	6.228	5.67	6.28	6.212	6.411	5.988	6.554	6.761
C4orf6	9.341	9.072	9.048	6.284	6.766	6.892	6.617	6.54	6.993	7.472	9.191	9.286	8.647	7.403	6.935	6.896	7.184	6.856	7.273	7.637
C4orf9	11.829	12.183	11.7	11.805	10.524	10.541	10.606	10.293	10.469	11.148	11.948	11.654	11.642	12.332	10.401	10.401	10.403	10.437	10.648	11.373
C5orf13	12.313	12.893	13.146	10.003	12.227	11.628	11.617	11.087	10.541	9.103	12.568	12.653	13.456	10.841	12.309	11.958	11.674	10.972	10.535	8.996
C5orf14	10.891	10.909	10.291	10.381	10.67	10.802	10.901	10.516	10.689	11.132	10.575	10.576	10.536	10.84	10.563	10.683	10.965	10.638	10.859	11.171
C5orf15	13.311	13.32	12.808	11.791	12.579	12.434	12.626	12.156	12.018	12.18	13.419	13.138	13.004	12.288	12.463	12.318	12.486	12.159	12.255	12.244
C5orf18	12.869	14.013	13.726	14.046	14.396	14.219	14.457	14.021	14.055	14.495	13.091	13.842	13.859	14.456	13.868	14.13	14.091	14.016	14.137	14.557
C5orf3	10.761	10.847	10.837	10.638	11.186	11.322	11.448	10.937	10.922	11.158	10.818	10.743	10.696	11.027	11.249	11.256	11.274	10.898	11.134	11.337
C5orf4	9.17	9.649	9.15	8.343	8.772	8.464	8.286	8.091	8.283	8.535	9.403	9.221	9.235	8.819	8.386	8.175	8.422	8.248	8.546	8.749
C6orf10	5.842	5.576	5.473	4.75	5.371	5.653	5.443	5.443	5.243	5.208	5.454	5.346	5.29	5.328	5.125	5.563	5.436	5.586	5.069	5.17
C6orf106	8.799	8.896	9.214	9.705	10.672	11.222	10.534	10.753	10.804	11.214	9.483	8.858	8.908	10.02	10.435	10.869	10.879	10.998	11.034	11.188
C6orf107	7.533	6.925	6.993	7.125	7.39	7.48	7.316	7.28	7.338	7.722	6.951	6.941	6.901	7.464	7.266	7.45	7.407	7.472	7.447	7.843
C6orf11	11.746	12.012	11.255	11.267	10.488	10.77	10.662	10.268	10.493	11.061	12.253	11.661	11.402	12.245	10.423	10.594	10.367	10.47	10.761	11.212
C6orf111	11.613	11.783	11.514	11.145	11.394	11.062	11.517	10.891	10.655	11.107	11.794	11.536	11.301	11.481	11	10.612	11.436	10.852	10.687	10.88
C6orf113	10.752	10.822	10.274	8.738	10.061	9.933	10.131	9.578	9.464	9.769	10.908	10.771	10.356	9.803	9.829	9.898	9.942	9.796	9.774	9.888
C6orf115	9.693	9.391	7.865	4.704	6.27	5.776	5.786	5.817	6.305	5.939	9.817	9.492	8.42	5.46	6.238	5.851	5.863	5.876	6.243	6.02
C6orf118	11.438	11.489	10.841	10.867	11.766	11.495	11.666	11.002	11.449	11.2	11.357	10.876	10.979	12.065	11.314	11.08	11.621	11.271	11.728	11.416
C6orf120	6.343	6.321	6.395	5.638	5.474	5.393	5.332	5.218	5.502	5.711	6.307	6.105	6.285	5.884	5.246	5.074	5.471	5.373	5.521	5.679
C6orf128	9.658	10.334	10.392	11.017	10.212	9.753	9.249	9.413	9.147	8.639	9.83	9.738	10.479	10.211	9.855	9.479	9.355	9.474	9.335	8.541
C6orf129	12.133	12.212	11.06	8.038	9.39	9.426	9.663	9.483	9.914	9.948	12.314	11.813	10.99	8.759	9.282	9.137	9.767	9.553	10.214	10.065
C6orf130	11.981	12.802	12.578	11.237	11.92	12.604	12.619	12.321	12.084	12.249	12.282	12.544	12.632	12.233	11.702	12.479	12.567	12.351	12.255	12.28
C6orf134	10.567	10.415	10.313	7.326	7.761	7.902	8.077	7.638	7.391	7.701	10.324	10.089	9.831	7.958	7.476	7.494	8.156	7.557	7.581	7.805
C6orf136	10.652	10.92	10.971	10.898	11.4	11.629	11.573	11.032	11.144	11.411	10.672	10.628	10.973	11.973	11.303	11.331	11.763	11.411	11.5	11.403
C6orf139	7.203	6.688	6.109	5.128	6.03	5.977	6.134	5.836	6.119	5.921	7.067	6.519	5.981	5.549	6.214	6.07	6.282	5.803	6.07	6.059
C6orf143	4.397	4.617	4.663	4.504	4.451	4.658	4.599	4.784	4.402	4.561	4.589	4.339	5.09	4.559	4.835	5.035	4.782	4.562	4.424	4.667
C6orf146	4.383	4.867	4.629	4.421	4.471	4.389	4.524	4.196	4.089	4.446	4.963	5.125	4.304	4.976	4.07	4.581	4.733	4.46	4.465	4.633
C6orf150	8.134	7.483	6.408	5.098	5.275	5.211	5.322	4.727	5.063	4.979	8.202	7.397	6.528	5.216	5.28	5.6	5.411	4.995	5.05	4.935
C6orf151	9.718	10.437	9.858	8.693	8.445	8.129	8.3	7.738	8.095	8.458	10.142	9.933	9.656	9.045	8.223	7.934	8.524	8.081	8.486	8.638
C6orf157	9.576	10.333	10.309	9.116	9.506	9.865	10.068	9.493	9.968	9.587	9.661	10.457	10.186	9.972	9.638	9.904	9.988	9.607	10.047	9.7
C6orf162	9.503	10.087	10.027	10.947	11.13	11.404	11.347	10.77	10.824	11.521	9.902	9.71	9.954	11.316	11.086	11.155	11.487	11.161	11.334	11.487
C6orf163	7.47	7.789	7.703	7.091	7.97	8.075	8.681	7.839	8.31	8.003	7.562	7.648	7.634	7.626	7.88	8.063	8.834	8.351	8.772	8.264
C6orf165	5.17	4.916	4.515	4.851	4.57	4.689	4.896	4.475	5.078	4.95	5.143	4.525	4.854	4.955	4.624	4.578	4.963	4.57	5.24	5.014
C6orf166	10.806	10.676	10.401	10.604	11.762	11.531	11.192	11.063	10.857	11.559	10.989	10.474	10.585	10.821	11.497	11.279	11.362	11.37	11.22	11.573
C6orf167	6.326	5.758	5.127	4.81	4.996	4.923	4.593	4.277	4.873	5.193	6.357	5.627	5.071	4.491	4.533	4.967	4.612	4.585	4.656	5.074
C6orf168	7.829	7.567	7.302	6.406	7.002	7.16	7.346	6.72	6.566	6.842	7.719	7.356	7.279	7.314	6.843	7.047	7.345	6.801	6.772	6.878
C6orf170	6.549	6.026	5.677	4.487	5.019	4.865	4.798	4.501	5.111	5.243	6.714	5.915	5.421	5.021	4.946	4.686	4.931	4.742	5.161	5.173
C6orf173	8.874	9.246	7.636	5.944	6.692	6.382	6.69	6.37	6.71	6.111	9.565	8.847	8.661	6.582	7.177	7.101	6.588	6.884	7.357	7.106
C6orf182	6.629	6.692	6.609	6.759	6.809	6.971	7.238	6.765	6.891	7.277	6.647	6.736	6.67	6.643	6.423	6.697	7.245	6.644	6.967	7.262
C6orf188	5.001	5.199	5.673	4.425	4.904	5.021	4.659	4.704	4.749	4.717	5.554	5.605	5.698	4.726	4.697	5.058	5.129	4.837	5.036	4.744
C6orf192	7.271	7.565	7.108	6.099	6.06	5.878	6.537	5.998	6.128	6.397	7.385	7.153	7.009	6.498	5.672	5.714	6.286	5.784	5.962	6.738
C6orf194	4.933	4.978	4.725	4.388	5.039	4.877	4.798	4.625	4.756	4.834	5.166	4.649	4.38	4.418	4.62	4.595	4.972	4.777	4.815	4.746
C6orf195	11.259	11.881	11.244	10.605	11.004	11.47	11.486	10.951	11.266	11.116	11.519	11.375	11.257	11.436	11.142	11.454	11.323	11.231	11.584	11.292
C6orf199	7.769	7.434	7.341	5.78	6.296	6.253	6.356	6.139	6.313	7.018	6.849	6.51	6.535	6.588	5.693	6.007	5.545	5.474	5.903	6.372
C6orf201	8.316	8.341	8.3	8.51	9.506	10.237	10.054	9.536	9.876	9.863	8.703	8.209	8.376	9.108	9.816	10.064	10.547	10.113	10.671	10.063
C6orf203	9.438	10.05	9.689	9.666	11.253	11.648	11.525	10.995	11.468	11.202	9.633	9.681	9.783	10.798	11.086	11.36	11.913	11.197	11.797	11.379
C6orf204	5.19	5.661	7.798	9.698	11.101	11.272	11.225	11.112	11.377	11.754	5.486	6.427	7.664	10.534	11.268	11.305	11.609	11.879	12.216	12.061
C6orf206	7.075	7.761	7.459	7.252	9.404	8.32	8.209	8.509	7.521	7.962	7.13	7.52	7.1	7.781	7.596	7.896	8.379	8.136	7.671	7.928
C6orf21	5.943	6.331	6.123	5.47	5.661	5.674	5.506	5.528	5.793	5.804	6.492	5.869	5.936	5.77	5.577	5.42	5.652	5.611	5.907	5.753
C6orf210	8.394	8.882	8.581	7.423	8.06	8.507	8.259	8.096	8.317	8.205	8.627	8.496	8.536	7.86	8.049	8.267	8.446	8.198	8.56	8.219
C6orf25	6.534	6.617	6.566	6.338	6.105	6.369	6.246	6.022	6.004	6.135	6.857	6.234	6.284	6.796	5.898	6.017	6.301	6.191	6.166	6.095
C6orf26	8.247	8.694	8.812	7.07	7.09	7.146	7.09	6.773	6.773	7.154	8.375	8.899	8.663	6.933	7.032	7.356	7.307	7.103	7.165	7.365
C6orf27	8.56	8.762	9.033	9.096	9.178	9.159	8.959	8.672	8.581	8.697	8.87	8.589	8.833	9.267	8.944	8.745	9.065	8.741	8.82	8.643
C6orf32	9.456	9.168	9.386	6.608	7.42	7.638	8.28	7.657	7.645	7.954	9.59	9.195	9.206	7.852	7.679	8.397	7.799	8.408	7.83	8.392
C6orf47	10.384	11.1	10.419	9.32	9.461	9.54	9.53	9.095	9.416	9.626	10.782	10.553	10.356	9.887	9.569	9.548	9.858	9.534	9.933	9.905
C6orf49	13.058	13.472	13.16	13.094	13.526	13.806	13.802	13.419	13.533	13.865	13.324	13.144	13.065	13.792	13.463	13.673	13.764	13.512	13.647	13.897
C6orf55	9.325	8.985	8.637	8.377	8.816	9.128	9.245	8.781	9	9.192	9.344	9.022	8.634	8.685	8.744	9.073	9.133	8.952	9.074	9.233
C6orf57	9.456	9.478	9.687	9.026	9.355	9.569	9.587	9.196	9.435	9.692	9.554	9.377	9.451	9.591	9.223	9.383	9.76	9.415	9.731	9.614
C6orf62	6.123	6.293	6.153	5.883	5.624	5.625	5.571	5.482	5.642	5.977	6.359	5.944	6.035	6.335	5.335	5.443	5.738	5.67	5.738	5.937
C6orf64	9.194	10.005	9.276	9.206	9.637	9.636	9.928	9.039	9.543	9.722	9.131	9.48	9.308	9.814	9.437	9.517	9.507	9.002	9.6	9.675
C6orf65	7.46	6.574	5.711	4.567	4.864	4.736	4.482	4.724	4.757	4.852	7.319	6.662	6.073	4.623	4.67	4.544	4.722	4.898	4.885	4.857
C6orf68	8.832	8.669	8.398	7.897	8.344	8.329	8.408	7.883	8.116	8.1	9.025	8.399	8.342	8.635	8.169	8.149	8.302	8.026	8.207	8.156
C6orf69	8.756	9.012	8.345	7.756	8.279	8.336	8.228	8.12	8.177	8.35	8.828	8.545	8.412	8.302	8.014	8.282	8.379	8.209	8.399	8.618
C6orf79	7.861	7.769	6.984	7.429	7.905	8.317	8.032	7.928	7.999	8.441	7.893	7.081	6.825	8.204	8.046	8.131	8.216	8.177	8.346	8.524
C6orf81	6.123	5.237	4.892	8.138	7.051	5.361	6.051	4.924	5.44	7.849	6.302	4.837	4.657	7.739	6.329	5.189	5.988	4.915	5.651	7.507
C6orf82	12.426	12.921	12.412	11.783	12.504	12.837	12.814	12.281	12.437	12.77	12.669	12.549	12.331	12.473	12.336	12.632	12.778	12.4	12.703	12.758
C6orf84	7.547	7.539	6.983	4.372	5.591	5.342	5.341	5.017	5.283	5.672	7.797	7.191	6.611	5.201	5.269	5.183	5.357	5.403	5.475	5.801
C6orf85	9.213	9.747	9.354	9.842	9.379	9.611	9.364	9.414	8.981	9.29	9.194	9.585	9.228	10.28	9.333	9.14	9.607	9.647	9.155	9.552
C6orf89	8.122	8.326	8.31	7.539	7.762	7.816	7.586	7.245	7.512	7.82	8.301	8.146	8.316	8.226	7.623	7.611	7.6	7.497	7.802	7.945
C6orf96	9.69	9.576	8.852	7.02	7.967	7.555	8.338	7.798	7.762	8.08	9.681	9.354	9.172	8.003	7.384	7.313	8.226	7.794	7.8	8.051
C7	8.781	10.243	9.651	9.93	9.872	10.412	10.069	10.14	10.064	10.294	9.694	9.361	9.675	10.382	9.773	10.15	10.049	10.187	10.041	10.32
C7orf19	8.027	8.457	8.242	7.955	8.204	7.825	8.349	8.378	8.017	8.458	8.27	7.913	8.102	8.39	7.969	8.342	8.104	8.55	8.183	8.567
C7orf20	10.303	10.553	11.365	12.347	11.619	12.023	11.347	11.308	11.395	12.088	10.664	10.637	11.329	12.416	11.31	11.543	11.648	11.464	11.78	11.96
C7orf21	12.404	12.404	11.622	12.171	11.873	12.289	11.99	11.576	11.814	12.366	12.446	12.074	11.87	12.836	11.828	12.158	11.936	11.861	12.063	12.365
C7orf23	6.157	5.445	5.468	4.583	4.989	5.015	4.802	4.645	4.798	5.161	6.241	5.373	5.319	4.856	4.833	4.641	4.868	5.2	4.702	5.154
C7orf24	8.855	8.195	7.615	5.622	7.185	7.098	7.716	6.712	7.704	6.677	8.922	7.794	7.624	6.237	7.598	7.257	7.903	6.844	7.677	6.89
C7orf25	7.883	7.906	7.666	8.047	7.772	8.755	8.239	8.559	8.11	8.793	8.37	8.417	7.93	8.984	8.218	8.582	8.557	8.047	7.804	8.229
C7orf28A	11.691	11.8	11.295	10.953	11.25	11.375	11.483	10.883	10.977	11.296	11.85	11.58	11.391	11.659	11.078	11.151	11.243	10.939	11.161	11.355
C7orf30	9.493	9.693	9.293	7.245	8.588	8.467	9.045	8.414	8.731	8.759	9.351	9.311	9.233	8.312	8.256	8.468	8.939	8.597	8.75	8.711
C7orf36	6.966	7.06	6.767	6.114	6.488	6.549	6.554	6.258	6.194	6.659	7.204	6.888	6.731	6.91	6.363	6.366	6.486	6.51	6.496	6.775
C8B	5.85	5.835	5.389	5.113	5.074	5.302	4.854	5.194	5.088	5.405	6.05	5.397	5.063	5.283	4.823	5.31	5.075	5.262	5.128	5.214
C8G	12.777	12.957	13.672	13.399	13.614	13.903	13.46	13.327	13.362	13.668	12.802	12.894	13.336	13.415	13.312	13.444	13.598	13.472	13.66	13.602
C8orf1	9.567	9.731	9.302	9.27	9.944	10.318	10.212	9.939	10.083	10.28	9.374	9.516	9.351	10.021	9.995	10.3	10.454	10.209	10.292	10.576
C8orf13	6.845	6.441	6.193	4.706	4.47	4.696	4.841	4.914	4.681	4.65	5.858	5.941	6.282	4.991	4.401	4.495	4.617	4.759	4.6	4.676
C8orf20	11.665	12.24	11.251	8.572	9.851	9.546	9.294	9.114	9.268	9.636	11.853	11.569	11.339	9.636	9.673	9.4	9.386	9.147	9.503	9.648
C8orf4	9.817	10.495	11.014	9.556	10.587	10.495	10.159	10.154	10.016	10.524	10.242	10.111	10.824	9.62	10.72	10.847	11.246	10.583	10.664	10.526
C9ORF59	10.325	10.506	10.693	10.188	11.239	11.64	11.023	10.409	10.774	10.866	10.613	10.48	10.424	10.463	11.096	11.145	11.256	10.54	10.973	10.523
C9orf100	9.059	9.306	9.124	7.378	7.394	7.138	7.151	6.922	7.182	7.261	9.195	8.969	8.909	7.774	7.04	7.014	7.285	6.964	7.344	7.202
C9orf102	8.291	8.201	8.172	6.705	7.203	7.614	7.677	7.149	7.451	7.965	8.056	7.908	7.996	7.529	7.132	7.5	7.408	7.282	7.778	8.091
C9orf11	5.875	5.477	5.384	5.795	5.089	4.793	5.021	4.831	5.19	5.148	6.175	5.122	4.876	5.307	4.82	4.948	4.86	4.838	5.088	5.052
C9orf114	8.625	9.449	9.083	10.031	9.513	10.316	9.819	9.493	9.924	10.163	8.759	8.846	9.093	10.323	9.565	10.093	10.165	9.909	10.367	10.149
C9orf115	8.06	9.304	8.096	7.84	6.971	7.039	6.731	6.484	6.731	7.297	8.676	8.861	8.567	8.697	6.956	7.102	6.884	6.887	7.169	7.674
C9orf116	9.42	9.6	9.628	9.266	9.187	9.479	9.131	8.835	8.622	9.841	9.204	9.499	9.488	9.953	9.119	9.238	8.969	8.953	8.777	9.781
C9orf117	9.469	9.721	9.058	8.616	7.583	6.843	6.867	7.017	7.097	7.553	9.676	9.49	8.97	8.712	7.476	7.01	7.21	7.322	7.493	7.927
C9orf119	12.994	13.282	12.856	12.172	12.101	12.163	12.787	11.898	12.072	12.103	13.314	12.995	12.813	12.724	12.105	12.025	12.72	11.957	12.29	12.185
C9orf123	10.507	10.051	9.264	8.629	8.511	8.226	8.439	7.964	8.035	8.566	10.074	9.902	9.515	9.118	8.586	8.417	8.629	8.374	8.532	8.891
C9orf125	8.077	7.245	7.195	5.274	6.491	6.714	6.162	6.005	6.071	6.147	7.833	7.155	7.128	6.063	6.227	6.293	6.326	6.182	6.161	6.129
C9orf127	6.922	7.066	7.316	6.543	6.728	6.972	6.597	6.32	6.411	6.651	7.102	6.965	6.944	6.905	6.531	6.609	6.966	6.616	6.703	6.783
C9orf150	9.204	9.719	8.995	6.713	8.046	7.991	7.868	7.618	7.206	7.124	8.921	9.364	9.756	7.769	7.876	7.561	8.07	7.49	7.552	7.097
C9orf156	5.968	6.343	6.618	5.743	6.951	7.164	7.182	6.675	6.896	6.698	5.952	6.283	6.819	6.551	6.71	6.887	7.218	6.8	7.128	6.884
C9orf16	9.963	10.291	9.919	9.814	10.192	10.095	10.083	9.521	10.002	10.135	10.32	9.963	9.975	9.666	10.046	9.613	10.128	9.467	10.232	10.048
C9orf19	10.901	11.042	9.776	7.321	8.309	7.984	7.039	7.201	7.419	8.207	11.485	11.339	10.28	8.565	8.295	7.896	7.364	7.573	7.827	8.4
C9orf21	10.888	11.407	10.948	9.688	10.124	10.134	9.868	9.805	10.034	10.652	11.623	11.365	11.104	10.302	9.886	10.185	10.103	10.117	10.208	10.619
C9orf23	10.927	11.2	11.143	10.462	11.212	11.545	11.632	11.225	11.042	11.63	11.022	10.69	11.103	11.083	10.806	11.296	11.715	11.259	11.33	11.573
C9orf24	5.297	5.68	5.661	5.339	5.227	4.964	5.503	4.945	5.333	5.157	5.804	5.257	5.356	5.603	4.854	4.653	5.312	4.933	5.371	5.217
[truncated: 9,058 more rows]
