# Supplementary material for: A Differential Wiring Analysis of Expression Data Correctly Identifies the Gene Containing the Causal Mutation
Source: PLoS Comput Biol. 2009 May 1;5(5):e1000382. doi: 10.1371/journal.pcbi.1000382 (PMC2671163; doi:10.1371/journal.pcbi.1000382)
Supplement: Table S2 — The list of the transcriptional regulators (column 1) with their DE (column 2) and their combined, averaged RIF scores from Eq4 and Eq5 (column 3). (0.09 MB XLS) [file pcbi.1000382.s003.xls]

## Sheet: DE and RIF scores
AATF	-0.0002	-1.653
ABLIM1	0.0036	-0.198671
ABLIM3	-0.2035	-0.214744
ACTL6A	0.1092	-1.35901
ACTL6B	0.0431	3.02125
ADNP	0.0719	0.418024
ADRB2	-0.1618	-1.06262
AES	-0.156	-0.068537
AHR	-0.0114	1.15436
ALX3	0.0722	-0.825633
ALX4	-0.0218	-0.881244
ANKRD1	-0.5386	-1.03844
APBB1	0.0921	0.769613
AR	0.0199	-0.808575
ARID1B	0.0795	1.9848
ARID2	-0.0303	0.0811072
ARID3A	0.1213	0.0892411
ARID4A	-0.0006	-0.71764
ARID4B	0.0856	0.717794
ARID5A	-0.1001	-1.68436
ARID5B	0.1744	-1.76547
ARNT	0.0123	0.227077
ARNT2	-0.0107	-0.256785
ARNTL	0.1981	-1.79301
ARNTL2	-0.1207	-0.681906
ARX	-0.2136	-0.367973
ASB2	-0.0541	-1.08493
ASCL4	-0.0539	-1.45341
ASF1A	-0.0406	1.31095
ASF1B	-0.0618	-0.717692
ASH1L	-0.0151	0.963402
ASH2L	-0.1293	0.771605
ASIP	-0.4179	0.607104
ATBF1	0.1027	1.78232
ATF1	0.0225	-1.01919
ATF3	-0.6055	-1.51988
ATF4	0.089	-0.70353
ATF6	-0.083	0.390175
ATF7	0.008	0.8855
ATF7IP	0.1005	-0.501337
ATF7IP2	-0.0744	-0.927325
ATOH1	-0.0987	-1.32093
ATOH7	-0.0066	-1.32175
ATOH8	0.1134	-1.75857
ATRX	-0.2329	2.85036
BACH1	-0.0408	-0.691091
BACH2	0.2967	0.447352
BARHL1	0.0256	1.4951
BARX1	-0.0274	-0.818012
BATF	0.0186	-1.12289
BAZ1B	-0.023	0.910042
BAZ2A	-0.1515	-0.214152
BBX	0.0079	1.24777
BCL3	0.0016	-0.0188166
BCL6	0.1301	-0.928802
BCLAF1	-0.0828	-0.86387
BHLHB2	0.0153	-0.283726
BHLHB3	0.1128	-0.895213
BHLHB4	-0.0001	-1.64241
BHLHB5	0.3275	2.02749
BLZF1	-0.0229	-0.0950444
BMP5	-0.4069	1.99223
BRCA1	-0.0664	-0.137918
BRCA2	-0.0551	-0.176302
BRD7	-0.1239	1.34882
BRD8	0.1162	-0.920742
BTAF1	-0.0116	-0.436475
BTF3	-0.1073	-0.465538
BTG2	-0.6307	-0.928421
C10orf48	-0.2588	-0.108368
C11orf30	-0.0118	0.311496
C14orf106	-0.0928	1.47365
C14orf92	-0.0361	-0.0625813
C19orf2	-0.1295	0.391542
C1orf32	0.0719	-0.297127
C20orf100	0.0851	-0.431598
C20orf20	-0.0754	1.49401
C21orf5	0.0638	-0.0820955
C2orf3	-0.0341	1.1403
C6orf49	-0.0546	-0.0430789
CBFA2T2	-0.0755	0.913023
CBFA2T3	-0.0134	1.09029
CBFB	-0.2118	-1.63687
CBX3	-0.0077	-0.130262
CBX5	-0.1368	0.193693
CBX6	-0.1132	0.675736
CBX7	0.0621	-0.191519
CBX8	0.0936	0.333472
CCNDBP1	0.0741	0.71907
CCNK	-0.1216	2.79444
CCNT1	-0.0498	1.19238
CCNT2	-0.0962	1.10084
CDC42SE1	-0.1613	-0.245694
CDK7	0.0211	-2.39409
CDK9	-0.4888	1.27571
CDKN1A	-0.0558	-1.44475
CDKN1C	-0.0922	0.149188
CDX1	0.0159	-0.930437
CDX4	-0.0082	-0.198846
CDYL2	-0.0353	-0.742441
CEBPA	0.0158	-1.4882
CEBPB	0.0143	-1.25583
CEBPD	0.0452	-1.46515
CEBPE	0.1181	-1.6512
CEBPG	-0.1089	-0.148434
CFDP1	-0.0564	-0.177075
CHAF1A	-0.0112	0.963775
CHAF1B	0.0312	0.140617
CHD1L	0.0944	-0.516161
CHD2	0.0584	0.0654654
CHD3	-0.0834	-0.500832
CHD4	0.0043	-0.0351126
CHD6	-0.0667	0.501783
CHD7	0.1907	-0.480931
CHD8	-0.072	1.55845
CHD9	-0.0234	-0.507978
CHES1	0.0492	0.634093
CHORDC1	-0.2208	-0.673423
CHRDL2	-0.447	1.03174
CIC	0.0233	1.54287
CILP	-0.4441	1.30198
CITED1	-0.2249	-0.759341
CITED2	0.1165	-1.21323
CLOCK	-0.0718	-0.0816324
CNOT2	-0.1055	1.44574
CNOT3	-0.1295	-0.194907
CNOT8	-0.0273	0.453099
CREB1	-0.2391	0.972531
CREB3	-0.1025	0.946866
CREB3L1	-0.0754	-0.132461
CREB3L2	0.0245	1.2018
CREB5	-0.1248	0.341805
CREBL1	-0.1513	-0.501723
CREBL2	-0.0414	2.50104
CREG1	-0.0948	-1.17974
CREM	-0.1946	-0.405811
CRHR1	-0.009	-0.626681
CRK	-0.0135	1.55047
CRX	-0.0587	0.495603
CSDA	-0.1735	-0.934804
CSRP1	-0.3564	2.77206
CSRP2	-0.1107	-0.393343
CSRP3	-0.8367	-1.36061
CTCF	0.0219	1.18839
CTDSP1	-0.1024	2.38757
CTDSPL	0.0352	-0.364614
CTNNA1	-0.1423	0.442108
CTNNBIP1	0.0459	0.314115
CTNND2	0.06	-2.10461
CUTL1	-0.0535	-0.866619
CUTL2	-0.0028	-0.0714093
DACH1	-0.0484	0.119118
DAPK3	-0.1145	-1.34478
DBP	0.0183	2.06382
DCBLD2	-0.4523	1.86553
DDEF1	-0.0802	-0.0561157
DDIT3	-0.0246	-0.892464
DDX20	0.1981	-0.893355
DLX4	-0.0235	0.407554
DLX5	0.0301	-0.0699028
DLX6	-0.0382	0.357219
DMAP1	-0.0653	-0.0753309
DMBX1	-0.0266	0.413935
DMRT1	0.0028	1.07622
DMRT2	-0.0253	0.00152995
DMRTA2	-0.0363	-0.265748
DMRTB1	-0.0588	-1.4941
DNMT1	-0.0888	0.765467
DNMT2	0.0352	0.324246
DNMT3A	-0.0642	0.955544
DNMT3B	-0.077	1.33159
DOT1L	-0.0337	-1.73615
DR1	-0.0378	0.711093
E2F1	-0.1291	-0.0524696
E2F2	-0.0074	-0.316729
E2F3	-0.0118	-0.201021
E2F6	0.0041	-0.674039
E2F7	-0.0357	-0.37387
E4F1	0.0746	-0.252342
EBF	0.0472	1.22385
EBF2	-0.1669	0.0778925
EED	-0.0881	1.11219
EGR1	-0.0958	-0.0130778
EGR4	-0.0524	-0.865042
EHF	0.1002	-0.756381
EHMT1	-0.0398	-0.805462
EIF2C4	0.0295	-0.492286
ELF2	0.0383	1.32486
ELF3	0.0896	-0.466464
ELF4	-0.0562	-0.339965
ELF5	0.0337	-0.826137
ELK1	0.1317	-1.47187
ELK3	-0.1543	0.624473
ELK4	-0.1239	0.288871
ELL2	-0.0058	-0.57682
ELL3	-0.0471	-0.658616
EMX2	-0.173	-0.253813
ENG	-0.0993	1.73558
EP300	0.0342	0.733827
EP400	0.0189	-0.000574463
EPAS1	-0.1272	-0.342368
EPC1	0.0998	0.693918
EPC2	0.0176	-0.159988
ERCC3	-0.0388	0.970731
ERCC6	-0.1256	-0.480433
ERG	-0.0446	1.41252
ESR1	0.0929	-0.589628
ESRRA	-0.1314	-1.4546
ESRRB	-0.0174	-0.688653
ETS1	-0.2295	0.648448
ETS2	-0.101	-1.16442
ETV1	0.0171	-0.324191
ETV2	-0.1574	0.152561
ETV3	0.0166	-0.523143
ETV4	0.1451	2.03007
ETV6	0.0217	1.24982
EVI1	0.0633	0.827579
EVX1	-0.0747	-1.53221
EYA2	0.0547	-0.904674
EYA3	-0.2187	0.39488
EZH1	-0.1049	-0.316008
EZH2	0.156	-0.655357
FBXL10	0.0231	0.380581
FBXL11	0.0774	1.05347
FHL1	-0.4067	-0.888138
FHL3	-0.0262	-1.46018
FKHL18	0.0607	-1.16523
FLI1	-0.0922	0.47623
FOS	-0.4443	-1.36633
FOSB	-0.0638	-0.958316
FOSL2	-0.0762	-2.30217
FOXA3	0.1887	-0.91682
FOXC2	0.0986	-1.56108
FOXD1	-0.0994	0.0709755
FOXD2	-0.1971	-0.923297
FOXD3	0.0289	-0.326747
FOXF1	0.0469	0.227439
FOXF2	-0.029	0.61571
FOXH1	-0.0502	0.602496
FOXI1	0.0627	-0.852949
FOXJ1	0.0557	-0.779945
FOXJ2	-0.0113	-0.197996
FOXJ3	-0.0608	0.324406
FOXK2	-0.0551	1.0073
FOXL1	0.098	-1.05272
FOXL2	0.129	-0.171384
FOXM1	0.0465	-0.222962
FOXO1A	0.323	-0.54387
FOXO3A	0.0842	-1.13666
FOXP1	0.0972	-0.477168
FOXP3	-0.021	-0.785045
FOXP4	0.0322	0.404973
FOXQ1	0.2647	-1.82763
FRZB	-0.4199	2.56445
FST	-0.4239	-0.47623
FSTL1	-0.2008	0.282333
FSTL3	-0.0086	-0.238965
FSTL4	-0.0535	-0.470878
FUBP1	-0.0721	-0.5742
FUBP3	0.0131	0.0907253
GABPB2	-0.0664	-0.109975
GATA2	-0.019	-0.346988
GATA3	0.1843	0.0497204
GATA4	0.0259	-1.34953
GATA5	-0.0348	-0.487819
GATA6	0.0778	-0.640134
GBX2	-0.2085	1.00602
GDF8	0.0832	3.49358
GFI1B	0.0182	-0.706115
GLI2	-0.0712	-0.162374
GLI3	-0.095	-0.0550195
GLIS1	-0.0098	-0.375054
GMEB1	-0.0952	0.137784
GRIP1	-0.0096	-0.41886
GSH1	-0.0775	-1.20914
GTF2A1	-0.269	1.49477
GTF2A2	0.0168	0.844247
GTF2B	-0.0643	-0.0904311
GTF2E1	0.0886	-1.19356
GTF2E2	0.0394	0.877815
GTF2F1	-0.1226	-0.332948
GTF2F2	-0.2343	-0.87897
GTF2H1	-0.0299	-0.279201
GTF2H4	-0.0134	0.223899
GTF2I	-0.0748	1.01339
GTF2IRD1	-0.0429	0.0137637
H2AFY	-0.0072	0.603463
H2AFY2	0.0187	-0.0346026
HAND1	0.0377	-0.174942
HAT1	0.0198	2.79295
HBP1	0.2044	-2.02735
HCFC2	-0.0209	2.10442
HDAC1	-0.0692	0.354897
HDAC10	0.002	-0.402376
HDAC11	-0.0494	2.57595
HDAC2	-0.1579	2.17998
HDAC3	-0.0578	0.582775
HDAC4	0.1719	-1.1147
HDAC5	-0.0193	-0.838013
HDAC6	-0.019	0.039468
HDAC9	-0.2307	1.04306
HELLS	-0.0936	0.141105
HEMK1	-0.1129	-0.0646916
HES4	0.0716	-0.220395
HES6	-0.1236	-0.634571
HESX1	-0.0139	-0.161149
HEY1	-0.256	1.75673
HEY2	0.1195	-0.275731
HEYL	-0.3585	1.64672
HHEX	-0.1882	0.727484
HIF1A	-0.1159	-0.777091
HIP1	-0.1322	-0.135386
HIRA	-0.1412	-0.244135
HIRIP3	-0.0767	0.399915
HIVEP2	0.1031	0.70493
HLF	-0.068	-0.643452
HLX1	-0.0807	0.797065
HMG20A	-0.0863	2.35155
HMGA1	-0.1258	1.10901
HMGB1	-0.1505	0.318031
HMGB2	0.1781	-0.497374
HMGN1	-0.1198	0.486841
HMX2	-0.0145	-0.901567
HNF4A	-0.0751	-1.21787
HNRPD	-0.4103	3.01025
HOMER2	-0.4232	-0.801031
HOXA1	0.1896	-0.549627
HOXA2	0.214	0.0888794
HOXA3	-0.0284	-0.844156
HOXA4	0.0712	0.120089
HOXB1	0.1059	-1.06672
HOXB13	0.1045	-2.46218
HOXB2	0.0915	-0.44338
HOXB3	0.1296	-0.160258
HOXB4	0.0313	-1.06831
HOXB5	0.3372	0.129235
HOXB6	0.3688	-0.797062
HOXB7	0.0033	-0.789406
HOXC10	0.212	-0.259704
HOXC13	0.1364	-1.58708
HOXC4	0.0148	-0.268714
HOXC6	-0.0353	1.59952
HOXC8	-0.0519	0.642931
HOXC9	-0.0588	0.616656
HOXD10	0.1453	-0.338851
HOXD11	0.0882	-1.19589
HOXD13	0.1349	-0.789717
HOXD3	0.2191	1.2228
HOXD4	0.1906	-0.163148
HOXD9	-0.0263	-0.852463
HSBP1	-0.0836	-0.225078
HSF4	-0.0656	-0.229393
HTATIP	-0.0638	-0.278275
HTATIP2	-0.0851	0.00158271
HTATSF1	-0.0836	-0.0250536
HTLF	-0.2149	-1.11465
ID1	-0.2695	1.45335
ID2	-0.0746	-0.749639
ID3	-0.184	1.09564
ID4	0.1059	-0.536174
IFRD1	-0.0967	-2.42581
IKBKAP	-0.017	-0.503312
ILF2	-0.1323	0.151725
ING3	-0.039	-0.764986
INHBA	-0.0948	0.264503
INSM1	0.0484	-0.532563
INSM2	0.0505	1.36923
IPF1	-0.0116	0.395952
IRF2	-0.0248	0.908589
IRF3	0.0162	-0.147297
IRF4	0.0414	-1.08121
IRF5	0.0188	-0.572758
IRF6	0.0485	-0.450684
IRS4	0.1086	-0.321741
IRX3	0.013	-1.25642
IRX4	-0.0878	0.862609
IRX5	0.0619	-0.613204
IRX6	0.1603	-0.271498
ISGF3G	-0.0765	2.82183
ISL2	0.2456	-0.589183
JARID1A	-0.0072	0.299186
JARID1B	0.0747	-0.4292
JARID2	0.0121	-0.487004
JMJD1A	0.045	-1.81607
JMJD1B	-0.0902	-0.0381842
JMJD1C	0.006	0.380515
JMJD2B	0.0754	0.889762
JMJD2C	-0.1127	-0.654982
JMJD2D	-0.0216	-1.15785
JUB	-0.0206	0.159132
JUN	-0.2305	-0.220184
JUNB	0.0066	-1.36551
JUND	0.0189	1.20861
KCNJ5	-0.0166	-0.612249
KIAA1193	-0.0184	-0.698266
KIAA1443	-0.1038	0.502955
KLF12	-0.0911	0.461749
KLF13	0.0059	-0.751445
KLF15	0.2302	-2.04678
KLF16	0.0094	-1.85473
KLF5	-0.1206	0.682059
KLF7	-0.1509	1.12231
L3MBTL	-0.0255	-0.208665
L3MBTL2	-0.0719	0.454891
L3MBTL4	0.3816	0.358344
LASP1	-0.0688	0.460611
LASS5	-0.0897	0.13168
LDB1	0.0041	1.256
LHX4	-0.0576	0.322231
LHX6	0.0518	0.660672
LIMD1	-0.0783	0.247379
LIMS1	-0.1432	1.13762
LITAF	0.044	0.529153
LMCD1	-0.3448	-2.11214
LMO1	0.1188	-0.878407
LMO2	-0.1377	1.6827
LMO3	-0.1014	-0.77345
LMO4	-0.0336	-0.575999
LMO6	-0.0199	-0.484091
LMO7	-0.0878	-1.02993
LMX1B	0.0405	-0.565108
LPP	-0.0357	0.000152409
LPXN	0.0274	-1.34881
LRRFIP1	-0.1839	2.65227
LYL1	0.0506	-0.338834
LZTFL1	-0.1116	2.05137
LZTS1	-0.1874	-0.577623
MAFB	-0.0113	0.745614
MAFF	0.0036	-1.57112
MAFG	0.0916	-0.849051
MAFK	-0.0057	-2.28001
MAL	0.0813	-0.87217
MAML1	-0.052	0.111643
MAML2	-0.0412	-0.324566
MAP3K12	-0.0944	0.108278
MAPK8IP1	0.0385	1.13067
MAX	0.2631	-1.39836
MBD1	-0.0417	1.19971
MBD2	0.0139	-1.08054
MBD3	0.0108	-0.0977232
MBD4	-0.1517	1.05785
MCM10	-0.1047	-0.502755
MDC1	-0.0546	-0.164607
MDFI	-0.2039	-0.459887
MDM2	-0.1319	2.11089
MDM4	-0.0052	-0.372891
MECP2	-0.0459	1.28064
MED4	0.0348	0.767767
MEF2A	-0.1281	-0.575202
MEF2B	0.0587	0.978095
MEF2C	0.0806	3.21491
MEIS1	0.1038	-0.0358629
MEIS2	0.1344	-0.363776
MEIS3	0.0201	-0.117314
MEN1	0.026	0.415938
MEOX1	0.0208	-1.10629
MEOX2	-0.1976	1.00095
MIB1	-0.07	1.31652
MID1	-0.0312	-0.205224
MITF	0.0979	-1.03535
MKL2	0.0438	-0.317831
MLL	0.052	0.429488
MLL2	0.0191	-1.29017
MLL3	0.092	-0.200757
MLLT1	-0.0246	-0.048507
MLLT10	0.2799	2.40435
MLLT4	-0.02	-0.949178
MLLT7	-0.0073	0.526683
MLX	0.0413	-0.503716
MORF4L1	-0.1337	0.281073
MORF4L2	0.0182	1.92786
MSI1	0.0655	-0.676431
MSL3L1	0.0617	1.00167
MSX1	-0.1366	-1.53391
MSX2	0.032	-1.55241
MTA2	-0.0293	0.116049
MTF1	0.0346	2.0216
MUC1	0.0198	-0.532416
MXD3	0.0388	-0.165064
MXD4	-0.062	0.0355698
MXI1	0.1499	-1.49032
MYBL1	0.0718	-0.570354
MYBL2	0.0085	-0.191208
MYC	-0.2058	-1.14694
MYCBP	-0.0854	-0.0132361
MYCL1	0.0226	-0.0526572
MYCPBP	-0.0849	1.94024
MYEF2	0.0192	-0.132261
MYF5	-0.1883	0.967064
MYF6	-0.2667	-1.35864
MYO6	0.2612	1.19297
MYOD1	-0.4077	2.94278
MYOG	-0.0422	1.53381
MYST1	0.0415	-0.797525
MYST2	-0.0118	-1.05334
MYST3	0.018	1.96271
MYST4	-0.0013	0.053853
MYT1	0.0347	-2.28258
NAB1	-0.226	1.14674
NAB2	0.098	0.392928
NANOG	0.0185	-0.404264
NCOA1	-0.0646	0.584729
NCOA2	0.0259	1.28921
NCOA6	-0.0057	0.243332
NCOR1	-0.0716	-0.902324
NCOR2	-0.2704	1.37423
NEDD8	-0.0508	-0.0466253
NET1	-0.1129	-0.680956
NEUROD4	0.0411	-0.96715
NFAT5	0.036	0.467807
NFATC1	0.0454	-2.02041
NFATC2	-0.1247	1.77068
NFATC3	-0.0034	-0.580665
NFATC4	0.026	-0.152708
NFE2	0.1966	-0.825557
NFE2L1	0.1091	-1.73023
NFE2L2	-0.0004	0.567944
NFE2L3	0.0622	-0.937126
NFIA	0.0771	2.0897
NFIB	-0.0237	1.26375
NFIC	-0.0298	-0.654654
NFIL3	-0.0097	-1.52836
NFIX	-0.025	-0.406333
NFKB2	-0.1632	-0.949324
NFKBIA	0.0205	-0.91903
NFKBIE	-0.1519	-0.280713
NFRKB	0.0466	-0.377757
NFX1	0.0129	0.169194
NFYA	0.0112	0.700185
NFYC	-0.1203	2.1611
NIPBL	0.0495	-0.034204
NKX2-8	-0.0167	-0.596187
NKX3-1	-0.009	-0.55145
NKX6-1	-0.1981	-1.12217
NME2	-0.0801	-0.500358
NOTCH1	-0.0539	0.176269
NOTCH2	0.0069	0.606921
NOTCH3	-0.3203	1.87321
NOTCH4	-0.1589	0.0891684
NP	-0.1666	-0.560512
NPAS1	-0.0239	-1.0289
NPAS2	0.0183	-0.785637
NPAS3	-0.0079	-0.342175
NR1D2	0.0126	-0.711578
NR1H2	0.0335	-0.246468
NR1H3	0.0022	-0.594745
NR1I2	-0.0849	2.1936
NR2C1	0.0178	-0.848793
NR2C2	0.0201	-0.856759
NR2F1	0.0169	0.0104459
NR2F6	-0.0655	-0.387388
NR3C1	-0.0183	0.983061
NR3C2	-0.0813	1.99522
NR4A1	-0.1398	-0.877118
NR4A2	-0.2811	1.43612
NR4A3	0.0573	-1.1326
NR5A1	0.0394	-1.09976
NR5A2	-0.1618	0.579184
NR6A1	-0.0076	-1.3087
NRF1	-0.0281	-0.0679508
NRIP1	-0.0468	0.250083
NRL	0.0444	-1.59599
NSEP1	-0.0913	-0.904
NT5C2	-0.2589	-0.76233
NTF3	-0.1082	-0.438222
NUCB2	-0.0317	1.10316
NUFIP1	-0.0377	0.763942
OLIG1	0.0199	-1.20861
OLIG2	0.1244	-0.666782
OLIG3	0.0126	-0.433714
ONECUT2	0.183	-0.214779
OTP	0.2278	-0.961646
OVOL1	-0.1462	-0.272196
PADI4	0.0128	-2.11822
PARG	-0.0961	1.42113
PAWR	-0.0244	-0.529239
PAX1	-0.0196	0.294185
PAX4	0.0335	-0.237312
PAX5	-0.0191	-0.547534
PAX7	-0.1314	0.818208
PAX8	0.0504	-0.57172
PBX1	-0.0394	1.60262
PBX2	0.0261	0.702131
PBX3	-0.0953	-0.294858
PBX4	-0.06	-1.2536
PC	0.0623	0.366229
PCAF	-0.1098	-0.663833
PCQAP	0.0102	-0.88421
PDLIM1	-0.1324	0.0798821
PDLIM3	-0.2456	-0.992743
PDLIM4	-0.1905	0.137874
PDLIM7	-0.0827	-0.837679
PER1	0.0515	-0.807613
PFN1	-0.056	1.63556
PGR	-0.0681	-1.48221
PHC2	0.0568	-0.704052
PHF17	0.0192	0.313717
PHF2	-0.0157	1.38012
PHOX2A	0.0225	-1.08117
PIAS2	-0.0699	1.02953
PIAS4	0.0078	0.148163
PIR	-0.0786	-0.83323
PITPNC1	-0.0402	0.179352
PITX1	-0.0232	-1.38669
PITX2	-0.3152	2.12082
PITX3	0.0682	-1.23899
PKNOX1	0.0367	-1.24683
PKNOX2	0.0072	0.0884457
PLAGL1	-0.1392	-0.235325
PLAGL2	0.02	0.935795
PMF1	0.1387	2.14168
PML	-0.0301	2.31096
POLR2A	-0.0525	2.1961
POLR2I	-0.0278	-0.735465
POU1F1	-0.0569	-0.485955
POU2F1	0.0625	0.0118058
POU2F3	-0.0523	-0.41672
POU3F3	0.141	-0.319056
POU5F1	0.1194	-0.218589
POU6F1	-0.0222	0.351114
PPARA	-0.3083	-0.865611
PPARBP	-0.0955	0.410444
PPARD	0.0319	0.394173
PPARG	0.0305	-0.525757
PPARGC1A	-0.0036	0.00936141
PPRC1	-0.206	-0.499683
PRDM1	-0.0183	0.233506
PRDM12	0.0267	-0.642086
PRDM15	0.0554	-1.10397
PRDM2	0.05	1.76864
PRDM4	-0.1272	1.03142
PREB	-0.063	-1.53953
PRICKLE1	-0.2506	0.479477
PRICKLE2	0.0502	-0.295649
PRKAR1A	-0.0454	0.156195
PROK2	-0.0629	-0.236784
PROX1	-0.1477	-0.521613
PRRX1	-0.1517	0.0959958
PTTG1	0.0473	-0.101938
PURA	-0.0806	0.110412
PURB	-0.0618	-0.0755654
RAD54L	-0.0241	-0.676788
RAP1GDS1	-0.0921	0.361247
RARA	-0.0635	0.0256164
RARB	-0.1198	0.95722
RARG	0.0357	-0.00134823
RB1	0.0152	-0.4342
RBBP7	-0.0225	-0.385412
RBL1	-0.0944	1.01205
RBL2	-0.2433	0.35976
RBM14	0.0693	0.240645
RBPSUHL	0.0946	-0.798416
RCBTB1	0.038	0.268743
RCHY1	0.0478	-0.771194
RCOR1	0.0602	0.468956
RCOR3	0.0459	0.839728
RELA	-0.0924	-0.462402
RELB	-0.0613	0.925035
REST	-0.0852	0.129057
RFP	-0.1069	-0.805913
RFX1	0.1355	-0.569686
RFX2	-0.1136	-1.20054
RFX3	-0.0508	0.692563
RFX5	-0.1611	0.980717
RFXANK	-0.0205	-0.106405
RFXAP	-0.2398	1.52182
RING1	0.009	1.34454
RNF14	-0.0977	-0.483358
RNF20	-0.0726	-0.408977
RNF4	-0.0312	0.443493
RNF40	-0.0347	-0.704867
RORA	0.2281	1.59771
RORC	-0.0538	-0.974091
RREB1	0.0586	-1.19945
RUNX1	-0.1562	-0.325662
RUNX2	0.18	-0.827432
RUNX3	0.0373	-1.36322
RXRA	0.0468	-0.457009
RXRB	-0.029	-0.845798
RXRG	-0.2848	1.61976
RYBP	-0.0163	-0.418192
SAFB	0.0359	-0.378747
SAP18	-0.0898	-0.373038
SAP30	0.0601	-1.0643
SATB1	-0.0605	0.01061
SBNO1	-0.0115	0.804736
SCAND1	0.3002	-0.621259
SCMH1	0.0109	-1.01141
SDCCAG33	0.0589	0.979526
SERPINH1	-0.2408	0.741626
SERTAD2	-0.2057	0.0831964
SET	-0.0663	0.0512152
SETDB2	-0.0204	-0.809782
SETMAR	0.1554	0.182315
SFMBT1	-0.1691	0.389338
SHOX2	-0.192	-0.176431
SIN3A	0.0856	0.108556
SIRT1	0.0714	0.297996
SIRT2	0.0386	-0.663546
SIRT4	-0.0035	-0.212868
SIRT5	-0.13	-0.181888
SIRT6	0.0224	0.419402
SIRT7	-0.1071	-1.36142
SIX1	-0.1892	-0.745982
SIX2	-0.281	-0.353594
SIX3	-0.1147	-0.0738537
SIX4	-0.0576	-0.907042
SIX5	-0.0219	-0.569973
SIX6	0.0138	-1.75542
SKIL	0.0309	-0.546502
SLA2	-0.1497	0.30275
SLBP	0.0202	1.12875
SMAD1	0.0069	0.938446
SMAD2	-0.0367	1.36383
SMAD3	-0.139	1.41225
SMAD4	-0.0863	0.589711
SMAD6	-0.0394	0.0812713
SMAD7	-0.1456	-0.351876
SMAD9	-0.1433	-0.323353
SMARCA1	-0.0883	-0.220623
SMARCA3	-0.2016	0.723034
SMARCA4	-0.0619	-0.124834
SMARCA5	-0.0441	-0.601686
SMARCAD1	-0.0152	0.173783
SMARCAL1	-0.0515	-0.121704
SMARCB1	-0.1054	-0.347222
SMARCC2	-0.0079	1.00825
SMARCD2	-0.026	-0.450965
SMARCD3	-0.1553	-0.860775
SMARCE1	-0.1272	0.035986
SMOC2	-0.0413	0.0257746
SMYD1	-0.2651	2.42679
SMYD3	-0.0499	0.0288052
SNAI1	-0.0061	-0.531595
SNAI2	-0.2422	0.261945
SNAPC1	0.0628	-0.912494
SNAPC2	0.0444	-0.219515
SNAPC3	-0.1277	1.70171
SNAPC5	0.0303	0.182229
SNW1	-0.1002	-0.592067
SOD2	-0.2219	-0.838588
SOX10	-0.0425	-0.372287
SOX11	-0.1583	-0.0269998
SOX12	0.0025	-0.258802
SOX14	0.0191	-1.00484
SOX17	-0.1433	0.810863
SOX18	-0.0517	0.258203
SOX2	0.088	0.346867
SOX4	-0.0106	-0.0442161
SOX6	0.0833	1.59527
SOX7	0.0027	-0.220864
SOX8	-0.1265	1.41793
SP1	-0.0732	2.19151
SP2	-0.0823	-0.735032
SP3	-0.049	0.988955
SP4	0.0878	-0.541701
SP6	-0.0766	-0.244499
SP7	-0.0393	-0.870101
SPDEF	0.0559	-0.99602
SQSTM1	0.1929	-0.755519
SREBF2	-0.2091	0.296002
SRF	-0.2315	0.740834
SSRP1	-0.1219	-0.445156
STAT1	-0.1075	2.41435
STAT2	0.0203	-0.519526
STAT3	-0.2487	-0.112308
STAT4	0.0752	-0.654742
STAT5A	-0.0644	-1.02719
STAT5B	0.1839	-1.17908
SUPT16H	-0.0116	0.131006
SUPT4H1	-0.0158	0.191476
SURB7	-0.0565	0.507817
SUV39H1	0.0086	2.12056
SUV39H2	-0.0494	3.12801
SUV420H2	0.0603	-0.818135
TADA2L	-0.0843	-0.412336
TADA3L	-0.1095	-0.13283
TAF1	-0.0328	-0.569627
TAF1A	-0.0643	0.558867
TAF2	-0.0264	-0.499543
TAF5	-0.0254	1.23237
TAF6L	-0.0557	-0.377329
TAF7	0.162	-0.221004
TAF9	-0.0361	-0.798768
TAL1	-0.0467	0.0132361
TARBP1	-0.0378	1.57424
TARBP2	-0.0495	0.877798
TARDBP	0.1556	-0.155211
TBL1XR1	0.0107	-0.772313
TBP	-0.0731	1.01522
TBR1	-0.0089	-0.879679
TBX10	0.0205	-0.397622
TBX15	0.0054	-0.796939
TBX18	0.12	-0.233273
TBX19	0.0555	-0.178107
TBX2	-0.0362	-0.911292
TBX3	-0.125	0.531761
TBX4	0.0907	-0.153862
TBX5	0.0135	0.445494
TCEAL1	-0.0951	1.31789
TCEB2	-0.0339	0.0752195
TCEB3	0.0242	1.11944
TCERG1	-0.0407	-0.418801
TCF12	-0.0003	0.0968932
TCF15	-0.3103	0.963836
TCF20	-0.0259	0.195284
TCF3	-0.0463	-0.400424
TCF4	-0.0541	0.813788
TCF7	-0.0123	0.0713566
TCF7L1	0.0315	-0.177779
TCF7L2	0.0644	-0.00912107
TCF8	-0.0226	0.635583
TCFL1	-0.0219	-0.420267
TCFL5	0.0616	0.491938
TDP1	0.0097	-0.196349
TEAD1	-0.0555	0.958045
TEAD2	-0.0212	1.8219
TEAD3	-0.0906	-0.504174
TEF	-0.0894	1.11987
TFAM	-0.1596	0.770283
TFB1M	-0.0212	1.11212
TFB2M	-0.1303	-0.876655
TFCP2	-0.1218	1.27496
TFCP2L1	0.0443	-0.742388
TFDP1	0.0062	-0.726397
TFDP2	0.3502	-0.877217
TFE3	-0.0021	-0.588403
TFEB	0.0231	0.0667315
TFEC	-0.1208	-1.6078
TGFB1	-0.0386	1.72466
TGFB1I1	-0.0036	-0.390629
TGIF	-0.0482	-0.748907
TGIF2	-0.017	-1.59887
THRA	-0.0656	0.31868
THRB	0.118	-0.641441
TIAL1	-0.0124	1.96923
TLE1	-0.048	1.69607
TLK1	-0.0121	0.232557
TLK2	-0.0165	0.466756
TLX1	-0.0856	-1.34344
TLX2	0.0664	-0.461564
TMF1	-0.0973	-0.979032
TNF	-0.1411	-0.380142
TNFRSF1A	0.1495	1.52463
TOP2A	0.1051	0.0295087
TOP2B	-0.1164	2.29221
TP53	-0.0435	1.33131
TP73L	-0.0335	-0.826366
TRA1	-0.1144	-0.393724
TRAF4	0.0615	-0.135345
TRERF1	0.0611	0.23333
TRIM10	0.0921	-0.751961
TRIM28	0.0523	-0.877833
TRIM54	-0.2738	-1.28955
TRPS1	-0.1254	0.866196
TRRAP	-0.0121	-0.0236468
TSPYL2	-0.0631	-0.752043
TTF1	-0.0295	-1.10494
TWIST1	-0.0086	0.0362146
TWIST2	0.0445	-0.522592
UBN1	-0.0352	-1.10887
UBP1	-0.1227	1.0559
UBTF	0.0527	-0.32167
UHRF1	0.0038	0.0920525
USF1	-0.0204	1.57697
USF2	0.0137	-0.313399
USP6	0.0779	0.409213
VAV1	0.023	-0.212487
VAX2	-0.0063	-1.36793
VDR	-0.0901	-0.295485
VEGF	0.1251	-0.803827
VGLL1	0.0701	-0.0781036
VHL	-0.0637	1.56177
WDHD1	-0.1323	0.412738
WDR39	-0.0508	0.383258
XBP1	-0.225	1.14908
YAF2	0.0051	0.0144847
YAP1	-0.0263	2.14998
YEATS4	-0.0041	2.45383
ZBTB16	0.171	-1.3548
ZFHX1B	0.0325	0.182205
ZFHX2	-0.078	-0.547229
ZFHX4	-0.0478	-0.126927
ZFP161	-0.0643	-0.788093
ZFP36	-0.0705	-0.865195
ZFP36L1	-0.0171	-0.447653
ZFP36L2	-0.0026	-0.94137
ZFPM1	-0.0235	-0.919821
ZFPM2	-0.0859	-0.157327
ZHX1	-0.0641	0.765366
ZHX2	0.1096	0.493673
ZHX3	0.0523	-0.0255578
ZNF136	0.1682	0.198233
ZNF143	0.1244	-0.295649
ZNF148	-0.0132	0.627079
ZNF161	0.1739	0.30206
ZNF174	-0.1535	2.25578
ZNF177	0.0699	0.148566
ZNF185	-0.1617	0.0695101
ZNF189	-0.0418	1.78721
ZNF202	0.0015	-0.0111141
ZNF217	0.0963	-1.54488
ZNF238	-0.1219	0.287332
ZNF239	-0.0081	-0.129794
ZNF254	0.0566	-1.00362
ZNF263	-0.0533	0.296691
ZNF278	-0.0098	0.310476
ZNF281	0.0507	1.51624
ZNF287	-0.027	1.96519
ZNF354A	0.0254	0.822748
ZNF367	-0.1109	0.75716
ZNF398	0.0614	0.218875
ZNF406	0.0497	0.844563
ZNF42	0.0245	-0.697158
ZNF423	-0.2702	0.118785
ZNF541	-0.0039	-0.258157
ZNF76	0.0152	0.489142
ZNFN1A2	0.0776	0.33746
ZNFN1A4	0.114	1.24216
ZNFN1A5	-0.0461	-0.266463
